1 **TITLE**

2 Slowly evolving dopaminergic activity modulates the moment-to-moment probability of  
3 movement initiation.

4

5 **AUTHOR NAMES**

6 Allison E. Hamilos<sup>1\*</sup>, Giulia Spedicato<sup>1</sup>, Ye Hong<sup>1</sup>, Fangmiao Sun<sup>2</sup>, Yulong Li<sup>2</sup> &

7 John A. Assad<sup>1,3\*</sup>

8

9 **AFFILIATIONS**

10 <sup>1</sup>Department of Neurobiology, Harvard Medical School, Boston, Massachusetts, 02115, USA.

11 <sup>2</sup>State Key Laboratory of Membrane Biology, Peking University School of Life Sciences,  
12 Beijing, 100871, P.R. China.

13 <sup>3</sup>Istituto Italiano di Tecnologia, Genova, Italy.

14 \*For correspondence: A.H. ([ahamilos@g.harvard.edu](mailto:ahamilos@g.harvard.edu)) or J.A.A. ([jassad@hms.harvard.edu](mailto:jassad@hms.harvard.edu)).

15

16 **ABSTRACT**

17 Clues from human movement disorders have long suggested that the neurotransmitter dopamine  
18 plays a key role in motor control, but how the endogenous dopaminergic system regulates  
19 movement is unknown. Here we show dynamic dopaminergic signaling over seconds-long  
20 timescales controls movement timing in mice. Animals were trained to initiate licking after a self-  
21 timed interval following a start-timing cue. The movement time was variable from trial-to-trial, as  
22 expected from previous studies. Surprisingly, dopaminergic signals ramped-up over seconds  
23 between the start-timing cue and the self-timed movement, with variable dynamics that predicted

24 the movement time on single trials. Steeply rising signals preceded early lick-initiation, whereas  
25 slowly rising signals preceded later initiation. Higher baseline signals also predicted earlier self-  
26 timed movements. Optogenetic activation of dopamine neurons during self-timing did not trigger  
27 immediate movements, but rather caused systematic early-shifting of movement initiation,  
28 whereas inhibition caused late-shifting, as if modulating the probability of movement. Consistent  
29 with this view, the dynamics of the endogenous dopaminergic signals quantitatively predicted the  
30 moment-by-moment probability of movement initiation on single trials. These results reveal a  
31 causal role for dynamic dopaminergic signaling unfolding over seconds in modulating the decision  
32 of when to move.

33

## 34 INTRODUCTION

35 What makes us move? Empirically, a few hundred milliseconds before movement, thousands of  
36 neurons in the motor system suddenly become active in concert, and this neural activity is relayed  
37 via spinal and brainstem neurons to recruit muscle fibers that power movement (*Shenoy et al.,*  
38 *2013*). Yet just before this period of intense neuronal activity, the motor system is largely quiescent.  
39 How does the brain suddenly and profoundly rouse motor neurons into the coordinated action  
40 needed to trigger movement?

41

42 In the case of movements made in reaction to external stimuli, activity evoked first in sensory brain  
43 areas is presumably passed along to appropriate motor centers to trigger this coordinated neural  
44 activity, thereby leading to movement. But humans and animals can also self-initiate movement  
45 without overt, external input (*Deecke, 1996; Hallett, 2007; Lee and Assad, 2003; Romo et al.,*  
46 *1992*). For example, while reading this page, you may decide without prompting to reach for your

47 coffee. In that case, the movement cannot be clearly related to an abrupt, conspicuous sensory cue.  
48 What “went off” in your brain that made you reach for your coffee at this *particular* moment, as  
49 opposed to a moment earlier or later?

50

51 Human movement disorders may provide clues to this mystery. Patients and animal models of  
52 Parkinson’s Disease experience difficulty self-initiating movements, exemplified by perseveration  
53 (*Hughes et al., 2013*), trouble initiating steps when walking (*Bloxham et al., 1984*), and problems  
54 timing movements (*Malapani et al., 1998; Meck, 1986, 2006; Mikhael and Gershman, 2019*). In  
55 contrast to these self-generated actions, externally cued reactions are often less severely affected  
56 in Parkinson’s, a phenomenon sometimes referred to as “paradoxical kinesia” (*Barthel et al., 2018;*  
57 *Bloxham et al., 1984*). For example, patients’ gait can be normalized by walking aids that prompt  
58 steps in reaction to visual cues displayed on the ground (*Barthel et al., 2018*).

59

60 Because the underlying neuropathophysiology of Parkinson’s includes the loss of dopaminergic  
61 neurons (DANs), the symptomatology of Parkinson’s suggests DAN activity plays an important  
62 role in deciding when to self-initiate movement. Indeed, pharmacological manipulations of the  
63 neurotransmitter dopamine causally and bidirectionally influence movement timing (*Dews and*  
64 *Morse, 1958; Lustig and Meck, 2005; Meck, 1986; Mikhael and Gershman, 2019; Schuster and*  
65 *Zimmerman, 1961*). This can be demonstrated in the context of *self-timed* movement tasks, in  
66 which subjects reproduce a target-timing interval by making a movement following a self-timed  
67 delay that is referenced to a start-timing cue (*Malapani et al., 1998*). Species across the animal  
68 kingdom, from rodents and birds to primates, can learn these tasks and produce self-timed  
69 movements that occur, on average, at about the target time, although the exact timing exhibits

70 considerable variability from trial-to-trial (*Gallistel and Gibbon, 2000; Meck, 2006; Mello et al.,*  
71 *2015; Merchant et al., 2013; Rakitin et al., 1998; Remington et al., 2018; Schuster and*  
72 *Zimmerman, 1961; Sohn et al., 2019; Wang et al., 2018*). In such self-timed movement tasks,  
73 decreased dopamine availability/efficacy (*e.g., Parkinson's, neuroleptic drugs*) generally produces  
74 late-shifted movements (*Malapani et al., 1998; Meck, 1986, 2006; Merchant et al., 2013*),  
75 whereas high dopamine conditions (*e.g., amphetamines*) produce early-shifting (*Dews and Morse,*  
76 *1958; Schuster and Zimmerman, 1961*).

77

78 Although exogenous dopamine manipulations can influence timing behavior, it remains unknown  
79 whether endogenous DAN activity is involved in determining when to move. DANs densely  
80 innervate the striatum, where they modulate the activity of spiny projection neurons of the direct  
81 and indirect pathways, which are thought to exert a push-pull influence on movement centers  
82 (*Albin et al., 1989; DeLong, 1990; Freeze et al., 2013; Grillner and Robertson, 2016*). Moreover,  
83 phasic bursts of dopaminergic activity have been observed just prior to movement onset (within  
84 ~500 ms) (*Coddington and Dudman, 2018, 2019; da Silva et al., 2018; Dodson et al., 2016;*  
85 *Howe and Dombeck, 2016; Wang and Tsien, 2011*), and dopaminergic signals have been reported  
86 to reflect more general encoding of movement kinematics (*Barter et al., 2015; Engelhard et al.,*  
87 *2019; Parker et al., 2016*). However, optogenetic activation of dopamine neurons—within  
88 physiological range—does not elicit immediate movements (*Coddington and Dudman, 2018,*  
89 *2019*). We hypothesized that rather than overtly triggering movements, the ongoing activity of  
90 nigrostriatal DANs could influence movement initiation over longer timescales by controlling or  
91 modulating the moment-by-moment decision of *when* to execute a planned movement.

92



93 To test this hypothesis, we trained mice to make a movement (lick) after a self-timed interval  
94 following a start-timing cue. The mice learned the timed interval, but, as observed in other species,  
95 the exact timing of movement was highly variable from trial-to-trial, spanning seconds. We  
96 exploited this inherent variability by examining how moment-to-moment nigrostriatal DAN  
97 signals differed when animals decided to move relatively early versus late. We found that  
98 dopaminergic signals “ramped up” during the timing interval, with variable dynamics that were  
99 highly predictive of trial-by-trial movement timing, even seconds before the movement occurred.  
100 Optogenetic DAN manipulation during the timing interval produced bidirectional changes in the  
101 probability of movement timing, with activation causing a bias toward earlier self-timed  
102 movements and suppression causing a bias toward later self-timed movements. These combined  
103 observations suggest a novel role for the dopaminergic system in movement initiation, wherein  
104 slowly evolving signals modulate the moment-to-moment probability of whether a movement will  
105 occur.

106

## 107 **RESULTS**

108 We trained head-fixed mice to make self-timed movements to receive juice rewards (*Figure 1A*).  
109 Animals received an audio/visual start-timing cue and then had to decide when to first-lick in the  
110 absence of further cues. Animals only received juice if they waited a proscribed interval following  
111 the cue before making their first-lick (>3.3 s in most experiments). As expected from previous  
112 studies, the distribution of first-lick timing was broadly distributed over several seconds, and  
113 exhibited the canonical scalar property of timing, as described by Weber’s Law (*Figure 1B* and  
114 *Figure 1—figure supplement 1A-B; (Gallistel and Gibbon, 2000)*). We note this variability in

115 timing was not imposed on the animal by training it to reproduce a variety of target intervals (*e.g.*,  
116 2 vs. 5 s), but is rather a natural consequence of timing behavior, even for a single target interval.  
117  
118 Our main objective was to exploit the inherent variability in self-timed behavior to examine how  
119 differences in neural activity might relate to variability in movement timing. Nonetheless, the  
120 trained animals well-understood the timing contingencies of the task. In self-timed movement tasks  
121 in which a *single* movement is used to assess timing, the distributions of movement times (in both  
122 rodents and monkeys) tend to anticipate the target interval, even at the expense of reward on many  
123 trials (*Eckard and Kyonka, 2018; Kirshenbaum et al., 2008; Lee and Assad, 2003*). In these  
124 paradigms, however, once a movement occurs, it removes future opportunities to move, which  
125 creates premature “bias” in the raw timing distributions (*Anger, 1956*). To correct this bias,  
126 movement times must be normalized by the (ever-diminishing) number of opportunities to move  
127 at each timepoint (*Jaldow et al., 1990*). This yields the hazard function (the conditional probability  
128 of movement given that movement has not already occurred, as a function of time), which is  
129 equivalent to the instantaneous probability of movement. For example, on the first day of training,  
130 our animals displayed fairly flat hazard functions, indicating a uniform instantaneous probability  
131 of movement over time—*i.e.*, the animals did not yet understand the timing contingency  
132 (*Figure 1C-D*). However, after training, the hazard function for our animals peaked near the target  
133 time (either 3.3 or 5 s), suggesting an accurate latent timing process reflected in the instantaneous  
134 movement probability (*Figure 1E*). Mice trained on a variant of the self-timed movement task  
135 without lamp-off/on events showed no systematic differences in their timing distributions  
136 (*Figure 1—figure supplement 1C*), suggesting that the mice referenced their timing to the start-  
137 timing cue rather than the lamp-off event.

138

139 When mice were fully trained, we employed fiber photometry to record the activity of genetically-  
140 defined DANs expressing the calcium-sensitive fluorophore GCaMP6f (12 mice, substantia nigra  
141 pars compacta (SNc); *Figure 1—figure supplement 2*). We controlled for mechanical/optical  
142 artifacts by simultaneously recording fluorescence modulation of a co-expressed, calcium-  
143 insensitive fluorophore, tdTomato. We also recorded bodily movements with neck-muscle EMG,  
144 high-speed video, and a back-mounted accelerometer.

145

#### 146 **DAN signals ramp up slowly between the start-timing cue and self-timed movement**

147 DAN GCaMP6f fluorescence typically exhibited brief transients following cue onset and  
148 immediately before first-lick onset (*Figure 2A*), as observed in previous studies (*Coddington and*  
149 *Dudman, 2018; da Silva et al., 2018; Dodson et al., 2016; Howe and Dombeck, 2016; Schultz et*  
150 *al., 1997*). However, during the timed interval, we observed slow “ramping up” of fluorescence  
151 over seconds, with a minimum after the cue-aligned transient and maximum just before the lick-  
152 related transient. The relatively fast intrinsic decay kinetics of GCaMP6f ( $t_{1/2} < 100$  ms at 37°;  
153 (*Helassa et al., 2016*)) should not produce appreciable signal integration over the seconds-long  
154 timescales of the ramps we observed.

155

156 We asked whether this ramping differed between trials in which the animal moved relatively early  
157 or late. Strikingly, when we averaged signals pooled by movement time, we observed systematic  
158 differences in the steepness of ramping that were highly predictive of movement timing  
159 (*Figure 2B-C*). Trials with early first-licks exhibited steep ramping, whereas trials with later first-  
160 licks started from lower fluorescence levels and rose more slowly toward the time of movement.

161 The fluorescence ramps terminated at nearly the same amplitude, regardless of the movement time.  
162 Ramping dynamics were not evident in control tdTomato signals (*Figure 2C*), indicating that the  
163 ramping in the GCaMP6f signals was not an optical artifact. The quantitative relationship between  
164 GCaMP6f dynamics and movement time will be addressed in a subsequent section of this paper.

165

### 166 **Higher pre-cue DAN signals are correlated with earlier self-timed movements**

167 In addition to ramping dynamics, average DAN GCaMP6f signals were correlated with first-lick  
168 timing even before cue-onset (the “baseline” period, between lamp-off to cue event), with higher  
169 baseline fluorescence predicting earlier first-licks (Pearson’s  $r=-0.89$ ,  $n=12$  mice; *Figure 2B-C*).  
170 Because  $dF/F$  correction methods can potentially distort baseline measurements, we rigorously  
171 tested and validated three different  $dF/F$  methods, and we also repeated analyses with raw  
172 fluorescence values compared between pairs of sequential trials with different movement times  
173 (*Figure 2—figure supplement 1*; see *Methods*). All reported results, including the systematic  
174 baseline differences, were robust to  $dF/F$  correction.

175

176 In principle, the amplitude of the baseline signal on a given trial  $n$  could be related to the outcome  
177 of the previous trial or the animal’s behavior during the baseline interval. To test this, we  
178 performed 4-way ANOVA on the baseline signal (averaged for each trial between lamp-off and  
179 the start-timing cue,  $n=12$  mice), including factors 1) outcome of the previous ( $n-1^{\text{th}}$ ) trial  
180 (rewarded or unrewarded); 2) presence or absence of spontaneous licking during the baseline  
181 period; 3) upcoming movement time on trial  $n$  (categorized as  $<3.3$  s or  $>3.3$  s, to provide a simple  
182 binary proxy for movement time); and 4) session number (to account for signal variability across  
183 animals and daily sessions). Although previous trial outcome and baseline-licking were significant

184 predictors of baseline amplitude ( $p < 0.01$  for both), the upcoming movement time had a significant  
185 independent (main) effect ( $p < 10^{-5}$ ). This raises the possibility of an additional source of variance  
186 in baseline dopaminergic activity that is independent from previous trial events, but potentially  
187 influences the upcoming movement time on that trial.

188

### 189 **Movement timing-related ramping dynamics in other dopaminergic areas and striatal** 190 **dopamine release**

191 We found similar ramping dynamics in SNc DAN axon terminals in the dorsolateral striatum (DLS;  
192 *Figure 2—figure supplement 2A-B*) at a location involved in goal-directed licking behavior  
193 (*Sippy et al., 2015*). Ramping was also present in GCaMP6f-expressing DAN cell bodies in the  
194 ventral tegmental area (VTA, *Figure 2—figure supplement 2C*), reminiscent of mesolimbic  
195 ramping signals described in goal-oriented navigation tasks (*Howe et al., 2013; Kim et al., 2019*).

196

197 To determine if these movement-timing-related signals are available to downstream targets that  
198 may be involved in movement initiation, we monitored dopamine release in the DLS with two  
199 complementary fluorescent dopamine sensors (dLight1.1 and DA<sub>2m</sub>) expressed broadly in striatal  
200 cells (*Figure 3 and Figure 2—figure supplement 2D-E*). The decay kinetics of the two  
201 extracellular dopamine sensors differ somewhat (*Patriarchi et al., 2018; Sun et al., 2020*), which  
202 we confirmed (dLight1.1  $t_{1/2} \sim 75$  ms, DA<sub>2m</sub>  $t_{1/2} \sim 125$  ms; *Figure 3—figure supplement 1*), yet both  
203 revealed similar timing-related ramping dynamics on average (*Figure 3 inset*). These combined  
204 data argue that the seconds-long dopaminergic ramping signals were not artifacts of sluggish  
205 temporal responses of the various fluorescent sensors and were ultimately expressed as ramp-like  
206 increases in dopamine release in the striatum.

207

208 **First-lick timing-predictive DAN signals are not explained by ongoing body movements**

209 The systematic ramping dynamics and baseline differences were not observed in the tdTomato  
210 optical control channel nor in any of the other movement-control channels, at least on average  
211 (*Figure 4*), making it unlikely that ramping dynamics could have arisen from optical artifacts.  
212 Nevertheless, because DANs show transient responses to salient cues and movements  
213 (*Coddington and Dudman, 2018; da Silva et al., 2018; Dodson et al., 2016; Howe and Dombeck,*  
214 *2016; Schultz et al., 1997*), it is possible that fluorescence signals could reflect the superposition  
215 of dopaminergic responses to multiple task events, including the cue, lick, ongoing spurious body  
216 movements, and hidden cognitive processes like timing. For example, accelerating spurious  
217 movements could, in principle, produce motor-related neural activity that “ramps up” during the  
218 timed interval, perhaps even at different rates on different trials.

219

220 We thus derived a nested generalized linear encoding model of single-trial GCaMP6f signals  
221 (*Engelhard et al., 2019; Park et al., 2014; Runyan et al., 2017*), a data-driven, statistical approach  
222 designed to isolate and quantify the contributions of task events (timing-independent predictors)  
223 from processes predictive of movement timing (timing-dependent predictors; *Figure 5A-B* and  
224 *Figure 5—figure supplement 1A-D*). The model robustly detected task-event GCaMP6f kernels  
225 locked to cue, lick and EMG/accelerometer events, but these timing-independent predictors alone  
226 were insufficient to capture the rich variability of GCaMP6f signals for trials with different first-  
227 lick times, especially the timing-dependent ramp-slope and baseline offset (n=12 mice, *Figure 5C*  
228 and *Figure 5—figure supplement 1E-G*). In contrast, two timing-dependent predictors robustly  
229 improved the model: 1) a baseline offset with amplitude linearly proportional to first-lick time;

230 and 2) a “stretch” feature representing percentages of the timed interval (*Figure 5B-C* and *Figure*  
231 *5—figure supplement 1E*). The baseline offset term fit a baseline level inversely proportional to  
232 movement time, and the temporal stretch feature predicted a ramping dynamic from the time of  
233 the cue up to the first-lick, whose slope was inversely proportional to first-lick time. Similar results  
234 were obtained for SNc DAN axon terminals in the DLS, VTA DAN cell bodies, and extracellular  
235 striatal dopamine release (*Figure 5—figure supplement 1H*).

236

237 We note that the stretch feature of this GLM makes no assumptions about the underlying shape of  
238 the dopaminergic signal; it only encodes percentages of timing intervals to allow for temporal  
239 “expansion” or “contraction” to fit whatever shape(s) were present in the data. In particular, the  
240 stretch feature cannot produce ramping unless ramping is present in the signal *and* temporally  
241 scales with the length of the interval. Because this feature empirically found a ramp (although not  
242 constrained to do so), the stretch aspect indicated that the underlying ramping process took place  
243 at different rates for trials with different movement times, at least on average.

244

245 In contrast to the GCaMP6f model, when the same GLM was applied to the tdTomato control  
246 signal, the timing-independent predictors (which could potentially cause optical/mechanical  
247 artifacts—cue onset, first-lick, EMG/accelerometer) improved the model, but timing-dependent  
248 predictors did not (*Figure 5C* and *Figure 5—figure supplement 1F-H*). In addition, separate  
249 principal component (PC) analysis revealed ramp-like and baseline-offset-like components that  
250 explained as much as 93% of the variance in DAN signals during the timing interval  
251 (mean: 66%, range: 16-93%), but similar PCs were not present when tdTomato control signals

252 were analyzed with PCA (mean variance explained: 4%, range: 1.6-15%, *Figure 5—figure*  
253 *supplement 2*).

254

### 255 **Single-trial DAN ramping and baseline signals predict movement timing**

256 Given that ramping and baseline-offset signals were not explained by nuisance movements or  
257 optical artifacts, we asked whether DAN GCaMP6f fluorescence could predict first-lick timing on  
258 single trials. Using a simple threshold-crossing decoding model (*Maimon and Assad, 2006*), we  
259 found that single-trial GCaMP6f signals were predictive of first-lick time even for low thresholds  
260 intersecting the “base” of the ramp, with the predictive value of the model progressively improving  
261 for higher thresholds (n=12 mice; mean R<sup>2</sup> low: 0.54, mid: 0.71, high: 0.82; analysis for one mouse  
262 shown in *Figure 6A*). We will return to this observation in more detail in the upcoming section on  
263 single-trial dynamics (see below).

264

265 To more thoroughly determine the independent, additional predictive power of DAN baseline and  
266 ramping signals over other task variables (*e.g.*, previous trial first-lick time and reward outcome,  
267 *etc.*), we derived a nested decoding model for first-lick time (*Figure 6A*). All predictors  
268 contributed to the predictive power of the model. However, even when we accounted for the  
269 contributions of prior trial history, tdTomato artifacts and baseline GCaMP6f signals, GCaMP6f  
270 threshold-crossing time robustly dominated the model and absorbed much of the variance  
271 explained by baseline dopaminergic signals, alone explaining 10% of the variance in first-lick time  
272 on average (range: 1-27%, *Figure 6B-D*). Alternate formulations of the decoding model produced  
273 similar results (*Figure 6—figure supplement 1*).

274



## 275 **Characterizing single-trial dopaminergic dynamics**

276 Although the threshold-crossing analysis made no assumptions about the underlying dynamics of  
277 the GCaMP6f signals on single-trials, in principle, ramping dynamics in *averaged* neural signals  
278 could be produced from individual trials with a single, discrete “step” occurring at different times  
279 on different trials. Ramping has long been observed in averaged neural signals recorded during  
280 perceptual decision tasks in monkeys, and there has been considerable debate over whether single-  
281 trial responses in these experiments are better classified as “ramps” or a single “step” (*Latimer et*  
282 *al., 2015, 2016; Shadlen et al., 2016; Zoltowski et al., 2019; Zylberberg and Shadlen, 2016*). It  
283 has even been suggested that different sampling distributions can produce opposite model  
284 classifications in ground-truth synthetic signals (*Chandrasekaran et al., 2018*).

285

286 We attempted to classify single-trial dynamics as a discrete stepping or ramping process with  
287 hierarchical Bayesian models implemented in probabilistic programs (*Figure 6—figure*  
288 *supplement 2A-B*). However, like the perceptual decision-making studies, we also found  
289 ambiguous results, with about half of single-trials best classified by a linear ramp and half best  
290 classified by a discrete step dynamic (*Figure 6—figure supplement 2C*). Nonetheless, three  
291 separate lines of evidence suggest that single trials are better characterized by slowly-evolving  
292 ramps:

293

294 First, the relationship of threshold-crossing time to first lick time is different for the step *vs.* ramp  
295 models when different threshold levels are sampled (*Maimon and Assad, 2006*), as schematized  
296 in *Figure 6—figure supplement 3A*. Increasing slope of this relationship is consistent with ramps  
297 on single trials, but not with a discrete step, which would be expected to have the same threshold-

298 crossing time regardless of threshold level (*Figure 6—figure supplement 3B*). We found that the  
299 slope of this relationship increased markedly as the threshold level was increased, consistent with  
300 the ramp model (n=12 mice, mean slope low: 0.46, mid: 0.7, high: 0.82, *Figure 6—figure*  
301 *supplement 3C*).

302

303 Second, if single trials involve a step change occurring at different times from trial-to-trial, then  
304 aligning trials on that step should produce a clear step on average (rather than a ramp) (*Latimer et*  
305 *al., 2015*). We thus aligned single-trial GCaMP6f signals according to that optimal step position  
306 determined from a Bayesian step model fit for each trial and then averaged the step-aligned signals  
307 across trials. The averaged signals did not resemble a step function, but rather yielded a sharp  
308 transient superimposed on a “background” ramping signal (*Figure 6—figure supplement 4A*).  
309 Step-aligned tdTomato and EMG averages showed a small inflection at the time of the step, but  
310 neither signal showed background ramping. This suggests that the detected “steps” in the  
311 GCaMP6f signals were likely transient movement artifacts superimposed on the slower ramping  
312 dynamic rather than *bona fide* steps.

313

314 Third, the ideal step model holds that the step occurs at different times from trial-to-trial, producing  
315 a ramping signal when trials are averaged together. In this view, the trial-by-trial variance of the  
316 signal should be maximal at the time at which 50% of the steps have occurred among all trials, and  
317 the signal should be minimal at the beginning and end of the interval (when no steps or all steps  
318 have occurred, respectively). We thus derived the optimal step time for each trial using the  
319 Bayesian step model, and then calculated variance as a function of time within pools of trials with  
320 similar movement times. The signal variance showed a monotonic downward trend during the

321 timed interval, with a minimum variance at the time of movement rather than at the point at which  
322 50% of steps had occurred among trials, inconsistent with the discrete step model (*Figure 6—  
323 figure supplement 4B*).

324

325 Thus, altogether, we did not find evidence for a discrete step dynamic on single trials; on the  
326 contrary, our observations concord with slow ramping dynamics on single trials. Regardless, our  
327 GLM movement-time decoding approaches in *Figure 6* did not make any assumptions about  
328 underlying single-trial dynamics.

329

### 330 **Moment-to-moment DAN activity causally controls movement timing**

331 Because dopaminergic ramping signals robustly predicted first-lick timing and were apparently  
332 transmitted via dopamine release to downstream striatal neurons, ramping DAN activity may  
333 causally determine movement timing. To test this, we optogenetically activated or inhibited DANs  
334 (in separate experiments) on 30% of randomly-interleaved trials (*Figure 7A* and *Figure 7—figure  
335 supplement 1*). For activation experiments, we chose light levels that elevated DAN activity within  
336 the physiological range observed in our self-timed movement task, as assayed by simultaneous  
337 photometry in the DLS with a fluorescent sensor of released dopamine (dLight1.1, *Figure 7—  
338 figure supplement 2*). DAN activation significantly early-shifted the distribution of self-timed  
339 movements on stimulated trials compared to unstimulated trials (12 mice,  $p < 2.8 \times 10^{-26}$ , 2-sample  
340 Kolmogorov-Smirnov (KS) Test), whereas inhibition produced significant late-shifting compared  
341 to unstimulated trials (4 mice,  $p < 0.0004$ , 2-sided KS Test) (*Figure 7B* and *Figure 7—figure  
342 supplement 3A*). Stimulation of mice expressing no opsin produced no consistent effect on timing  
343 (5 mice,  $p = 0.62$ , 2-sided KS Test). The direction of these effects was consistent across all animals

344 tested in each category (*Figure 7B*). Complementary analysis methods revealed consistent effects  
345 (bootstrapped difference in mean first-lick times between categories:  $p < 0.05$ , *Figure 7C-D*;  
346 bootstrapped comparison of difference in area under the cdf curves:  $p < 0.05$ , *Figure 7—figure*  
347 *supplement 3B*; bootstrapped difference in median first-lick times between categories:  $p < 0.05$ ,  
348 *Figure 7—figure supplement 3C*). Similar effects were obtained with activation of SNc DAN  
349 axon terminals in the DLS (2 mice, *Figure 7—figure supplement 3A-B*).

350

351 Recent studies have shown that physiological ranges of optogenetic DAN activation (as assayed  
352 by simultaneous recordings from DANs) fail to elicit overt movements (*Coddington and Dudman,*  
353 *2018*). We likewise found that optogenetic DAN activation did not elicit immediate licking outside  
354 the context of the task (*Figure 7—figure supplement 4A*). Additionally, optogenetic DAN  
355 inhibition did not reduce the rate of spontaneous licking outside the context of the task (*Figure 7—*  
356 *figure supplement 4B*). In both cases, we used the same light levels that had elicited the robust  
357 shifts in timing behavior during the self-timed movement task. In other control experiments, we  
358 purposefully drove neurons into non-physiological activity regimes during the task by applying  
359 higher activation light levels. Over-stimulation caused large, immediate, sustained increases in  
360 DLS dopamine (*Figure 7—figure supplement 2*), comparable in amplitude to the typical reward-  
361 related dopamine transients on interleaved, unstimulated trials. These non-physiological  
362 manipulations resulted in rapid, nonpurposeful body movements and disrupted performance of the  
363 task. Together, these results suggest that the optogenetic effects on timing in *Figure 7* did not  
364 result from direct, immediate triggering or suppression of movement, nor from non-physiological  
365 dopamine release due to over-stimulation.

366

367 **Linking endogenous DAN signals to the moment-to-moment probability of movement**  
368 **initiation**

369 Optogenetic manipulations of DAN activity in the physiological range appeared to modulate the  
370 *probability* of initiating the pre-potent, self-timed movement. Given that endogenous DAN signals  
371 increased during the timing interval of the self-timed movement task, we reasoned that the  
372 probability of movement should likewise increase over the course of the timed interval. We thus  
373 derived a nested probabilistic movement-state decoding model to explore the link between DAN  
374 signals and movement propensity (*Figure 8A*). We applied a GLM based on logistic regression,  
375 in which we classified each moment of time as either a non-movement (0) or movement (1) state  
376 (*Figure 8A-B*), and we examined how well various parameters could predict the probability of  
377 transitioning from the non-movement state to the movement state. Unlike the decoding model in  
378 **Figure 6**, which considers a single threshold-crossing time, the probabilistic approach takes into  
379 account continuous DAN signals. Initial model selection included previous trial history  
380 (movement time and reward outcome history) in addition to the DAN GCaMP6f signal, but  
381 Bayesian Information Criterion (BIC) analysis indicated that the instantaneous GCaMP6f signal  
382 alone was a robustly significant predictor of movement state, whereas previous trial outcomes were  
383 insignificant contributors and did not further improve the model (*Figure 8—figure supplement*  
384 *1*). We thus only considered the DAN GCaMP6f signal as a predictor in subsequent analyses.

385

386 The continuous DAN GCaMP6f signal was indeed predictive of current movement state at any  
387 time  $t$ , and it served as a significant predictor of movement state, up to at least 2 seconds in the  
388 past (*Figure 8C*). However, the signals became progressively more predictive of the current  
389 movement state as time approached  $t$ . That is, the dopaminergic signal levels closer to time  $t$  tended

390 to absorb the behavioral variance explained by more distant, previous signal levels (*Figure 8C*),  
391 reminiscent of how threshold crossing time absorbed the variance explained by the baseline  
392 dopaminergic signal in the movement-timing decoding model (*Figure 6B-C*). This observation is  
393 consistent with a diffusion-like ramping process on single trials, in which the most recent  
394 measurement gives the best estimate of whether there will be a transition to the movement state  
395 (but is difficult to reconcile with a discrete step process on single trials, consistent with the results  
396 in *Figure 6—figure supplements 3-4*).

397

398 We applied the fitted instantaneous probabilities of transitioning to the movement state to derive  
399 a fitted hazard function for each behavioral session (*Figure 8D*). The DAN GCaMP6f signals were  
400 remarkably predictive of the hazard function, both for individual sessions and on average,  
401 explaining 65% of the variance on average (n=12 mice). Conversely, when the model was fit on  
402 the same data in which the timepoint identifiers were shuffled, this predictive power was  
403 essentially abolished, explaining only 5% of the variance on average (*Figure 8E*).

404

405 Together, these results demonstrate that slowly-evolving dopaminergic signals are predictive of  
406 the moment-to-moment probability of movement initiation. When combined with the optogenetics  
407 results, they argue that dopaminergic signals causally modulate the moment-to-moment  
408 probability of the pre-potent movement. In this view, trial-by-trial variability in the DAN signal  
409 gives rise to trial-by-trial differences in movement timing in the self-timed movement task.

410

## 411 DISCUSSION

### 412 **A role for slowly ramping DAN activity in the timing of self-initiated movements**

413 We found that both baseline and slowly ramping DAN signals were predictive of the timing of  
414 self-initiated movements. A number of studies have reported short-latency (<500 ms) increases in  
415 DAN activity following sensory cues and immediately preceding self-initiated movements  
416 (*Coddington and Dudman, 2018; da Silva et al., 2018; Dodson et al., 2016; Howe and Dombeck,*  
417 *2016; Schultz et al., 1997*), similar to the sensory- and motor-related transients we observed within  
418 ~500 ms of the cue and first-lick. However, the ramping DAN signals we observed during self-  
419 timing were markedly different. The ramping signal unfolded over *seconds*, preceding the first-  
420 lick by as long as 10 s. Furthermore, variations in both ramping dynamics and baseline amplitude  
421 predicted the trial-by-trial timing of the first-lick, whether signals were recorded from SNc cell  
422 bodies, SNc axon terminals in the DLS, or VTA cell bodies. DAN signals were also reflected in  
423 the dynamics of dopamine release in the DLS, indicating availability of this information to  
424 downstream striatal effectors.

425

426 Optogenetic augmentation and suppression of DAN activity during the timing interval causally  
427 altered movement timing. Importantly, optogenetic DAN activation within the physiological range  
428 did not evoke immediate movements, consistent with prior work (*Coddington and Dudman, 2018;*  
429 *Lee et al., 2020*). This suggests that, rather than serving as direct drivers of movement, DANs  
430 influence *when* movements occur by modulating the moment-by-moment probability of movement.  
431 Applying this probabilistic view to the endogenous dopaminergic signals, we found that the  
432 ramping dynamics were highly predictive of the moment-by-moment probability of movement (as

433 captured by the hazard function), with DAN signals became progressively better predictors as the  
434 time of movement onset approached. These findings suggest that variations in slow DAN  
435 dynamics affect movement timing by influencing the moment-to-moment probability of  
436 generating a movement.

437

438 This view of dopaminergic modulation could be related to classic findings from extrapyramidal  
439 movement disorders, in which dysfunction of the nigrostriatal pathway produces aberrations in  
440 movement initiation rather than paralysis or paresis (*Bloxham et al., 1984; Fahn, 2011; Hallett*  
441 *and Khoshbin, 1980*). That is, movements do occur in extrapyramidal disorders, but at  
442 inappropriate times, either too little/late (*e.g.*, Parkinson's), or too often (*e.g.*, dyskinesias).  
443 Moreover, based on the deficits observed in Parkinsonian states (*e.g.*, perseveration), this role may  
444 extend to behavioral transitions more generally, *e.g.*, starting new movements *or* stopping ongoing  
445 movements.

446

#### 447 **Dopaminergic ramping in other contexts**

448 Previous studies have reported slow ramping dopaminergic signals in certain behavioral contexts,  
449 including goal-directed navigation (*Howe et al., 2013*); multi-step tasks culminating in reward  
450 (*Hamid et al., 2016; Howard et al., 2017; Mohebi et al., 2019*); and passive observation of  
451 dynamic visual cues indicating proximity to reward (*Kim et al., 2019*). It has been proposed that  
452 slowly ramping mesolimbic DAN signals could encode increasing value or reward anticipation as  
453 animals approach reward (*Hamid et al., 2016; Mohebi et al., 2019*), or alternatively could reflect  
454 “ongoing” reward-prediction errors (RPE) (*Kim et al., 2019; Mikhael et al., 2019*). The origin of  
455 the ramping signals we observed in the nigrostriatal system are consistent with either value or RPE



456 interpretations. (In a companion theoretical paper (*Hamilos and Assad, 2020*), we examine the  
457 possible origins of these dopaminergic signals in value and reward-prediction error computational  
458 frameworks (*Kim et al., 2019; Mikhael and Gershman, 2019; Mikhael et al., 2019*), which offers  
459 a reconciliation of apparently contradictory DAN signals reported in the context of a perceptual  
460 timing task (*Soares et al., 2016*)).

461

462 Regardless of their origin, it has been unclear how the brain *employs* slowly ramping DAN signals  
463 in behavior. Our study moves beyond previous work by finding that trial-by-trial variability in  
464 ramping dynamics explains the precise timing of a behavioral output—the self-timed lick—and  
465 that optogenetically manipulating SNc DAN activity causally alters the timing of that output. Thus,  
466 SNc ramping may not merely encode progress toward a behavioral goal, but could play a causal  
467 role in advancing that progress. In this view, ramping DAN signals could be related to, or even  
468 drive, ramping signals that have been observed in the motor system in anticipation of self-initiated  
469 movements, *e.g.*, readiness potentials in human EEG recordings (Deecke, 1996; Libet et al., 1983).

470

471 This view raises the question of whether the slow-timescale DAN signals we observed are unique  
472 to the timing requirement of our task or are present before any self-initiated movement. When we  
473 averaged DAN signals aligned to “spontaneous” licks during the ITI, we also observed noisy, slow  
474 ramping signals building over seconds to the time of the next lick, with a time course related to  
475 the duration of the inter-lick interval (*Figure 8—figure supplement 2*). This observation raises the  
476 possibility that slowly evolving DAN signals may be integral to the generation of self-initiated  
477 movements more generally—although our highly trained animals may have also been “rehearsing”  
478 timed movements between trials. It would be interesting to see whether slow ramping dynamics

479 predictive of movement timing could be detected in previously published datasets if DAN signals  
480 were similarly averaged according to the interval between self-initiated movement bouts.

481

482 **Relationship to setpoint and stretching dynamics in other networks during self-timed**  
483 **movement**

484 We found that DAN signals predict movement timing via two low-dimensional signals: a baseline  
485 offset and a ramping dynamic that “stretches” depending on trial-by-trial movement timing.  
486 Intriguingly, similar stretching of neural responses has been observed before self-timed movement  
487 in other brain areas in rats and primates, including the dorsal striatum (*Emmons et al., 2017; Mello*  
488 *et al., 2015; Wang et al., 2018*), lateral interparietal cortex (*Maimon and Assad, 2006*),  
489 presupplementary and supplementary motor areas (*Mita et al., 2009*), and dorsomedial frontal  
490 cortex (DMFC) (*Remington et al., 2018; Sohn et al., 2019; Wang et al., 2018; Xu et al., 2014*).  
491 In the case of DMFC, applying dimensionality reduction to the population responses revealed two  
492 lower-dimensional characteristics that resembled our findings in DANs: 1) the speed at which the  
493 population dynamics unfolded was scaled (“stretched”) to the length of the produced timing  
494 interval (*Wang et al., 2018*), and 2) the population state at the beginning of the self-timed  
495 movement interval (“setpoint”) was correlated with the timed interval (*Remington et al., 2018;*  
496 *Sohn et al., 2019*). Recurrent neural network models suggest variation in stretching and setpoint  
497 states could be controlled by (unknown) tonic or monotonically-ramping inputs to the cortico-  
498 striatal system (*Remington et al., 2018; Sohn et al., 2019; Wang et al., 2018*). We found that  
499 DANs exhibit both baseline (*e.g.*, “setpoint”) signals related to timing, as well as monotonically-  
500 ramping input during the timing interval. Thus, through their role as diffusely-projecting

501 modulators, DANs could potentially orchestrate variations in cortico-striatal dynamics observed  
502 during timing behavior.

503

#### 504 **Possible relationship to motivational/movement vigor**

505 In operant tasks in which difficulty is systematically varied over blocks of trials, increased inter-  
506 trial dopamine in the nucleus accumbens has been associated with higher average reward rate and  
507 with decreased latency to engage in a new trial, suggesting a link between dopamine and  
508 “motivational vigor,” the propensity to invest effort in work (*Hamid et al., 2016; Mohebi et al.,*  
509 *2019*). Intriguingly, we observed the *opposite* relationship in the self-timed movement task:  
510 periods with higher average reward rates had *lower* average baseline dopaminergic signals and  
511 later first-lick times. Moreover, for a given first-lick time (*e.g.*, 3.5-3.75 s), we did not detect  
512 differences in baseline (or ramping) signals during periods with different average reward rates,  
513 such as near the beginning or end of a session. This difference between the two tasks may be due  
514 to their opposing strategic constraints: in the aforementioned experiments, faster trial initiation  
515 increased the number of opportunities to obtain reward, whereas earlier first-licks tended to  
516 decrease reward acquisition in our self-timed movement task.

517

518 The basal ganglia have also been implicated in controlling “movement vigor,” generally referring  
519 to the speed, force or frequency of movements (*Bartholomew et al., 2016; Dudman and Krakauer,*  
520 *2016; Panigrahi et al., 2015; Turner and Desmurget, 2010; Yttri and Dudman, 2016*). The  
521 activity of nigrostriatal DANs has been shown to correlate with these parameters during movement  
522 bouts and could promote more vigorous movement via push-pull interactions with the direct and  
523 indirect pathways (*Barter et al., 2015; da Silva et al., 2018; Mazzoni et al., 2007; Panigrahi et*

524 *al., 2015*). Movement vigor might also entail earlier self-timed movements, mediated by moment-  
525 to-moment increases in dopaminergic activity.

526

527 If moving earlier is a signature of greater movement vigor, then earlier self-timed movements  
528 might also be executed with greater force/speed. We looked for movement-related vigor signals,  
529 examining both the amplitude of lick-related EMG signals and the latency between lick initiation  
530 and lick-tube contact. We detected no consistent differences in these force- or speed-related  
531 parameters as a function of movement time; on the contrary, the EMG signals were highly  
532 stereotyped irrespective of the first-lick time (data not shown). It is possible that vigor might affect  
533 movement timing without affecting movement kinematics/dynamics—but, if so, the distinction  
534 between “timing” and “vigor” would seem largely semantical.

535

### 536 **Overall view**

537 Lesion and pharmacological studies have long suggested roles for the SNc and dopamine in timing  
538 (*Meck, 2006; Merchant et al., 2013*). Broadly speaking, conditions that increase dopamine  
539 availability affect timing as if speeding an internal “pacemaker” (*Dews and Morse, 1958; Mikhael*  
540 *and Gershman, 2019; Schuster and Zimmerman, 1961*), whereas conditions that decrease  
541 dopamine availability/efficacy generally have the opposite effect (*Malapani et al., 1998; Meck,*  
542 *1986, 2006; Merchant et al., 2013*). The dopaminergic ramping signals we observed bear some  
543 resemblance to Pacemaker-Accumulator models of neural timing, a longstanding conceptual  
544 framework for timing behavior in which a hypothetical accumulator signals that an interval has  
545 elapsed when it reaches a threshold level (*Gallistel and Gibbon, 2000; Lustig and Meck, 2005;*  
546 *Meck, 2006*).

547

548 However, we would suggest a more nuanced view of the role of DANs in self-timed movements.

549 Our optogenetic manipulations indicate that, rather than abruptly triggering movement when

550 threshold is attained, DAN activity modulates the probability of the pre-potent movement. In this

551 view, as DAN activity ramps up, the probability of movement likewise increases, and thus different

552 rates of increase in DAN activity equate to shorter or longer elapsed intervals before movement,

553 on average. This framework leaves open the question of what makes movements “probabilistic.”

554 One possibility is that recurrent cortical-basal ganglia–thalamic circuits could act to generate

555 movements “on their own,” without direct external triggers. By providing crucial modulation of

556 these circuits, DANs could tune the propensity to make self-initiated movements—and

557 pathological loss of DANs could reduce the production of such movements. Future experiments

558 should address how dynamic dopaminergic input influences downstream motor circuits involved

559 in self-initiated movements.

560

561 **FIGURES**

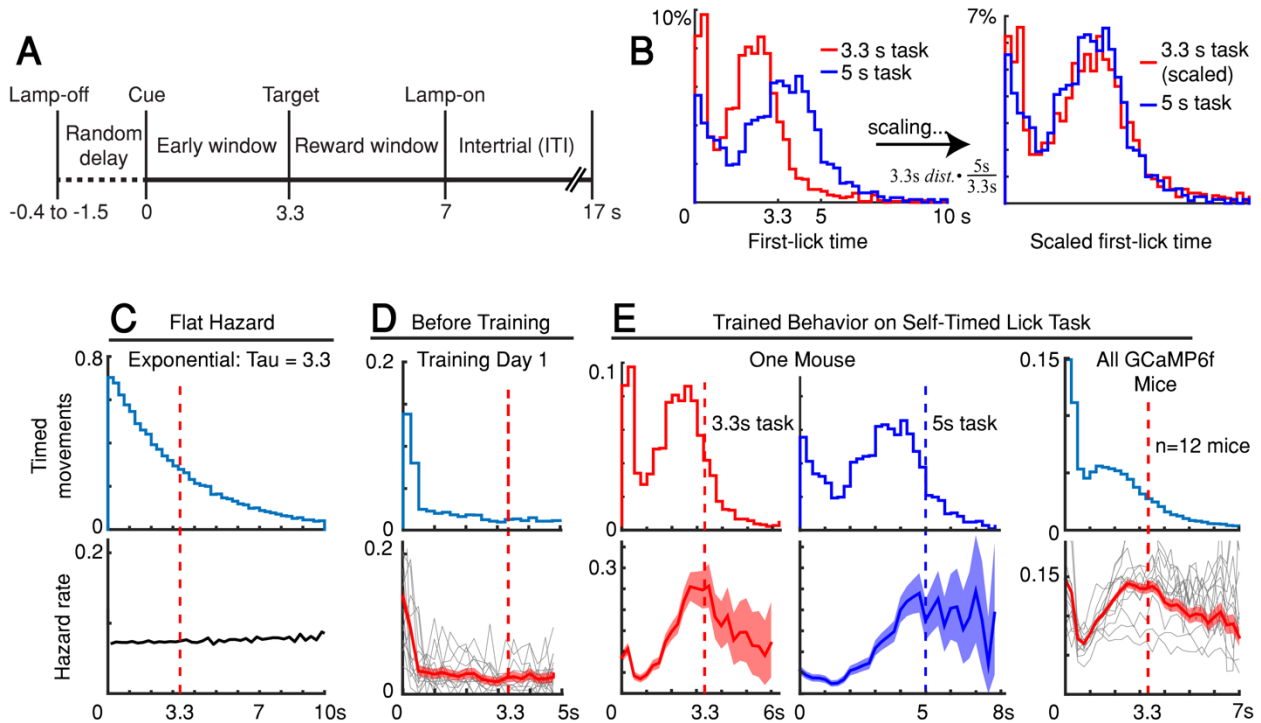

562  
 563 **Figure 1.** Self-timed movement task. **(A)** Task schematic (3.3 s version shown). **(B)** First-lick  
 564 timing distributions generated by the same mouse exhibit the scalar property of timing  
 565 (Weber’s Law). Red: 3.3 s target time (4 sessions); Blue: 5 s target time (4 sessions). For all  
 566 mice, see *Figure 1—figure supplement 1B*. **(C-E)** Hazard-function analysis. Time=0 is the  
 567 start-timing cue; dashed vertical lines are target times. **(C)** Uniform instantaneous probability  
 568 of movement over time is equivalent to a flat hazard rate (bottom) and produces an exponential  
 569 first-lick timing distribution (top). **(D)** Before Training: First day of exposure to the self-timed  
 570 movement task. Top: average first-lick timing distribution across mice; bottom: corresponding  
 571 hazard functions. Gray traces: single session data. Red traces: average among all sessions, with  
 572 shading indicating 95% confidence interval produced by 10,000x bootstrap procedure. **(E)**  
 573 Trained Behavior: Hazard functions (bottom) computed from the first-lick timing distributions  
 574 for the 3.3 s- and 5 s tasks (top) reveal peaks at the target times. Right: average first-lick timing  
 575 distribution and hazard functions for all 12 GCaMP6f photometry animals. See also *Figure*  
 576 *1—figure supplements 1-2*. Source data: *Figure 1—source data*.

577  
 578

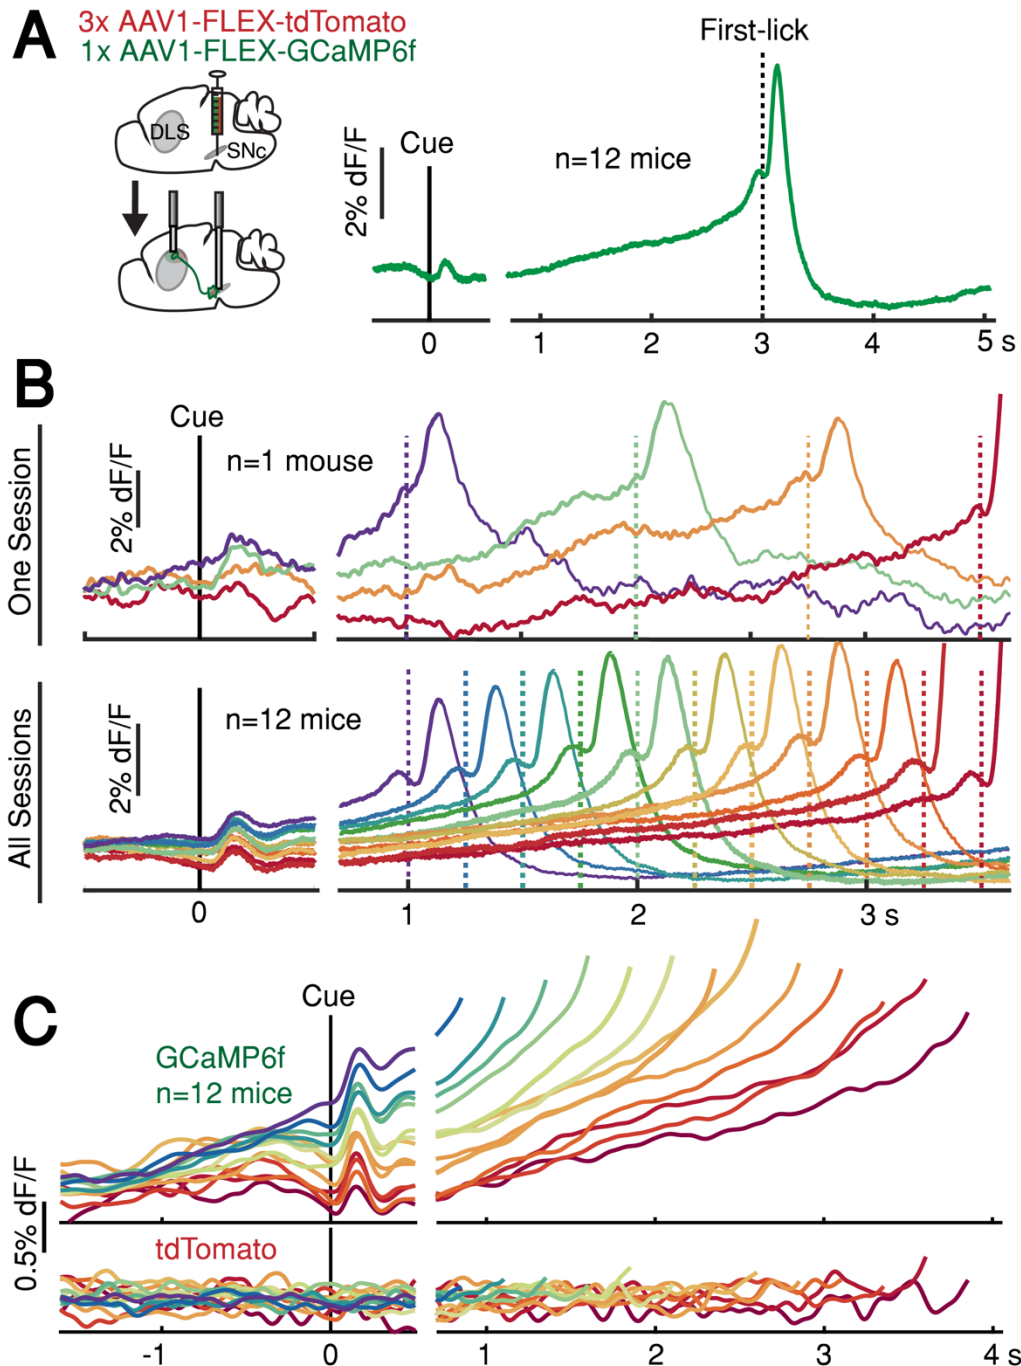

579

580 **Figure 2.** SNc DAN signals preceding self-timed movement. (A) Left: surgical strategy for

581 GCaMP6f/tdTomato fiber photometry. Right: average SNc DAN GCaMP6f response for first-licks

582 between 3-3.25 s (12 mice). Data aligned separately to both cue-onset (left) and first-lick (right), with

583 the break in the time axis indicating the change in plot alignment. (B) Average SNc DAN GCaMP6f

584 responses for different first-lick times (indicated by dashed vertical lines). (C) Comparison of average

585 DAN GCaMP6f and tdTomato responses on expanded vertical scale. Traces plotted up to 150 ms

586 before first-lick. See also *Figure 2—figure supplements 1-3*. Source data: *Figure 2—source data*.

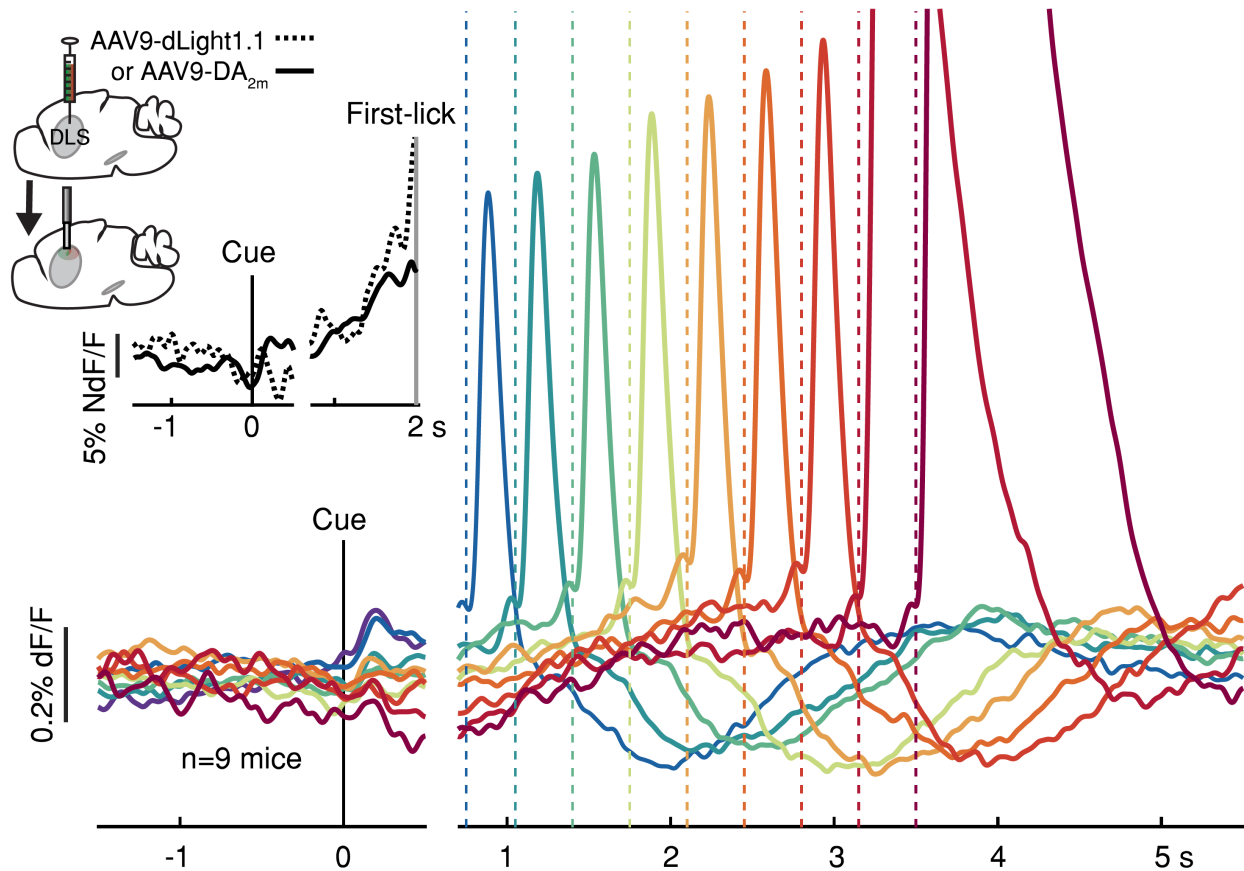

587  
588

589 **Figure 3.** Striatal dopamine release during the self-timed movement task. Photometry signals  
590 averaged together from DA<sub>2m</sub> signals (n=4 mice) and dLight1.1 signals (n=5 mice) recorded in DLS.  
591 Axis break and plot alignment as in *Figure 2*. Dashed lines: first-lick times. Inset, left: surgical  
592 strategy. Inset, right: Comparison of dLight1.1 and DA<sub>2m</sub> dynamics. Expanded vertical scale to  
593 show ramping in the average signals for DA<sub>2m</sub> (solid trace) and dLight1.1 (dashed trace) up until  
594 the time of the first-lick (first-lick occurred between 2-3 s after the cue for this subset of the data).  
595 See also: *Figure 3—figure supplement 1*. Source data: *Figure 3—source data*.



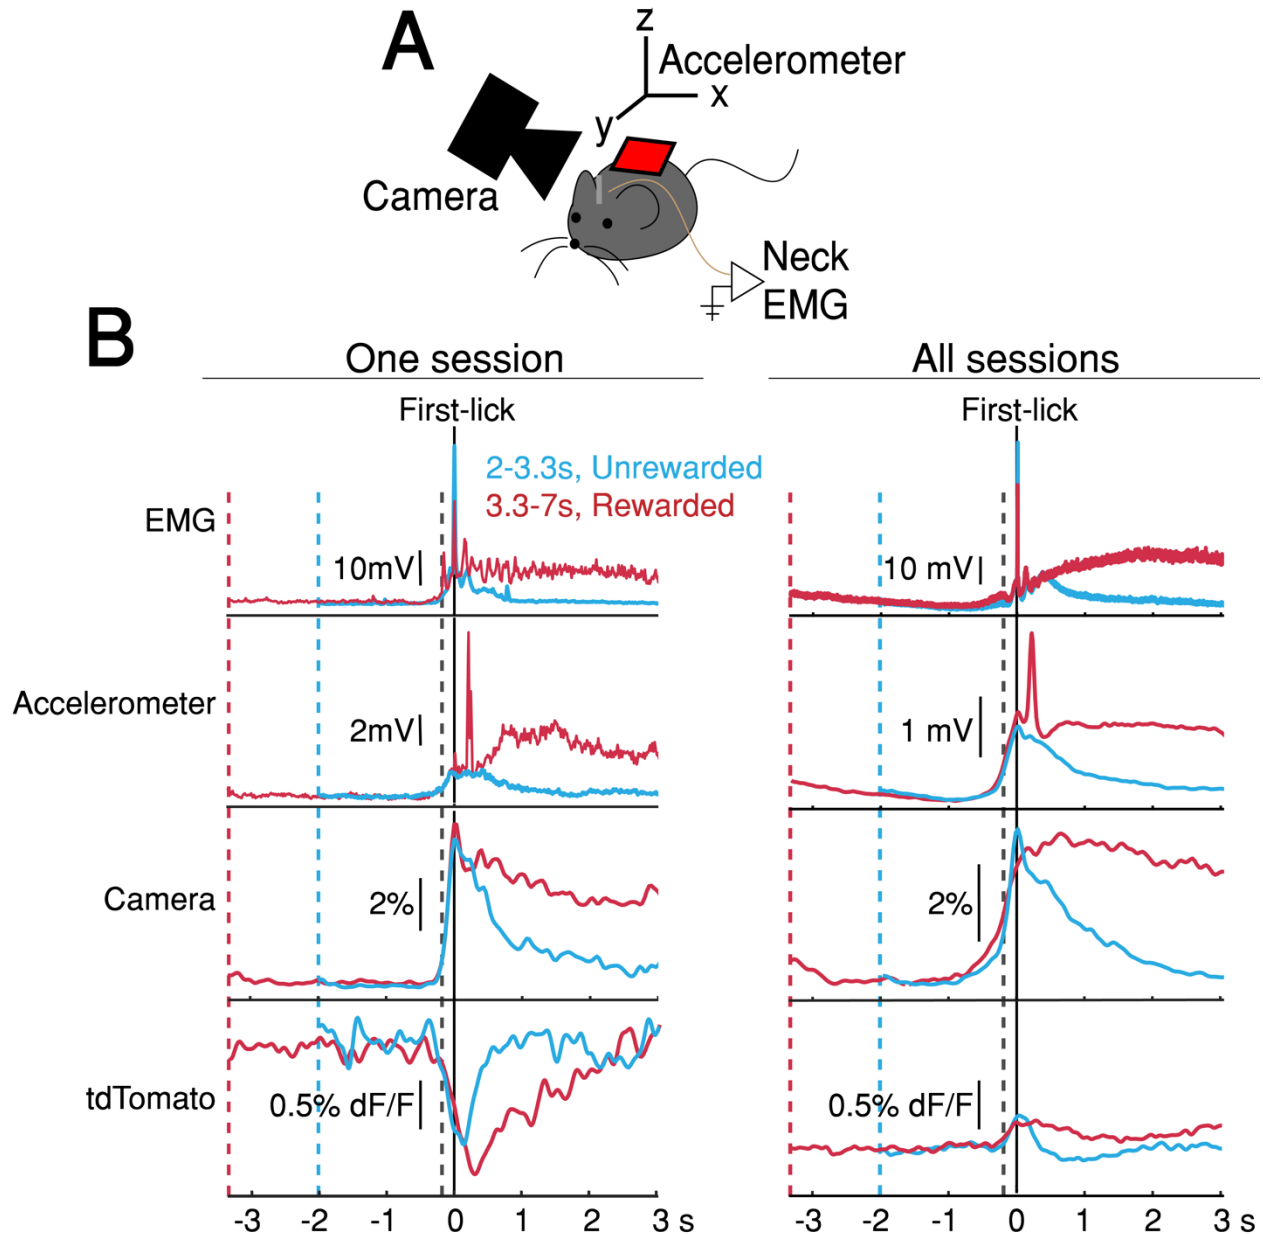

596  
597  
598  
599  
600  
601  
602  
603  
604  
605

**Figure 4.** Movement controls reliably detected movements, but there were no systematic differences in movement during the timing interval. **(A)** Schematic of movement-control measurements. **(B)** First-lick-aligned average movement signals on rewarded (red) and unrewarded (blue) trials. Pre-lick traces begin at the nearest cue-time (dashed red, dashed blue). Left: one session; Right: all sessions. Dashed grey line: time of earliest-detected movement on most sessions (150 ms before first-lick). Average first-lick-aligned tdTomato optical artifacts showed inconsistent excursion directions (up/down) even within the same session; signals for each artifact direction shown in *Figure 4—figure supplement 1*. Source data: *Figure 4—source data*.

606

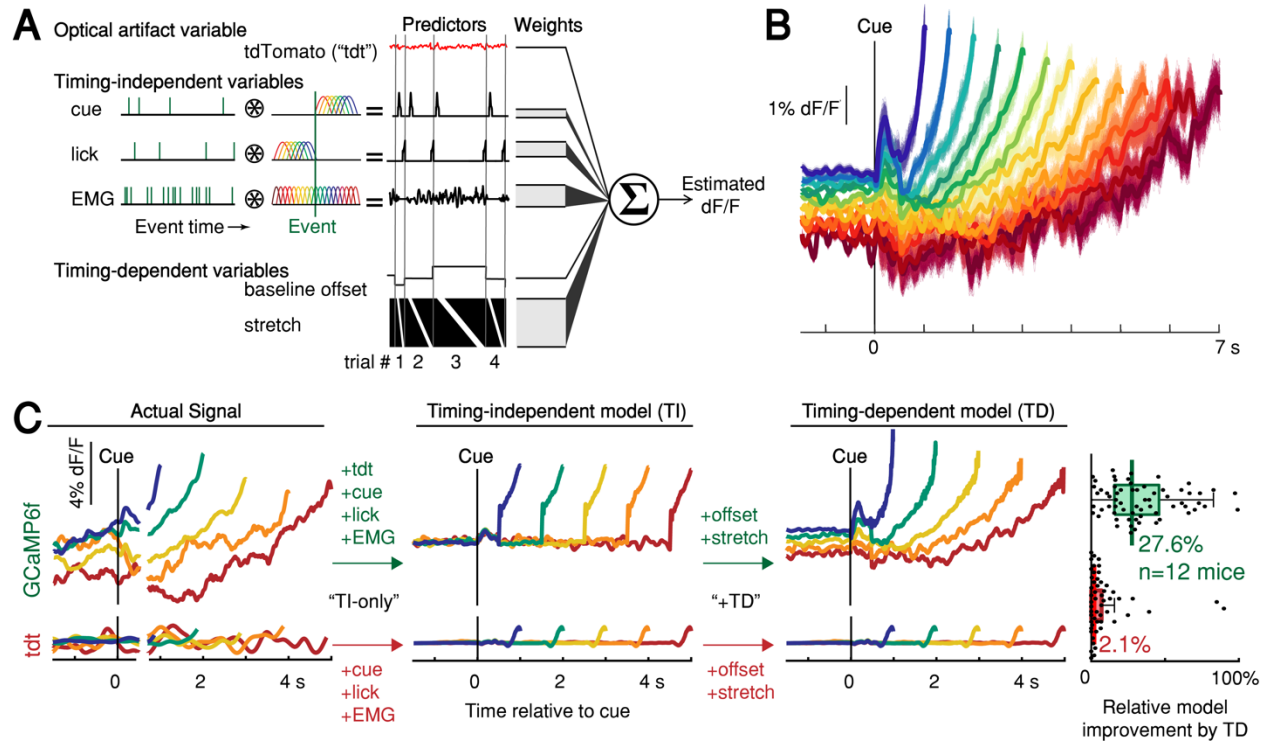

607  
608  
609  
610  
611  
612  
613  
614  
615  
616  
617

**Figure 5.** Contribution of optical artifacts, task variables and nuisance bodily movements to SNc GCaMP6f signals. (A) Nested encoding model comparing the contribution of timing-independent predictors (TI) to the contribution of timing-dependent predictors (TD). (B) Predicted dF/F signal for one session plotted up to time of first-lick. Model error simulated 300x (shading). (C) Nested encoding model for one session showing the actual recorded signal (1st panel), the timing-independent model (2nd panel), and the full, timing-dependent model with all predictors (3rd panel). Top: GCaMP6f; Bottom: tdTomato (tdt). Right: relative loss improvement by timing-dependent predictors (grey dots: single sessions, line: median, box: lower/upper quartiles, whiskers: 1.5x IQR). See also *Figure 5—figure supplement 1*. Source data: *Figure 5—source data*.

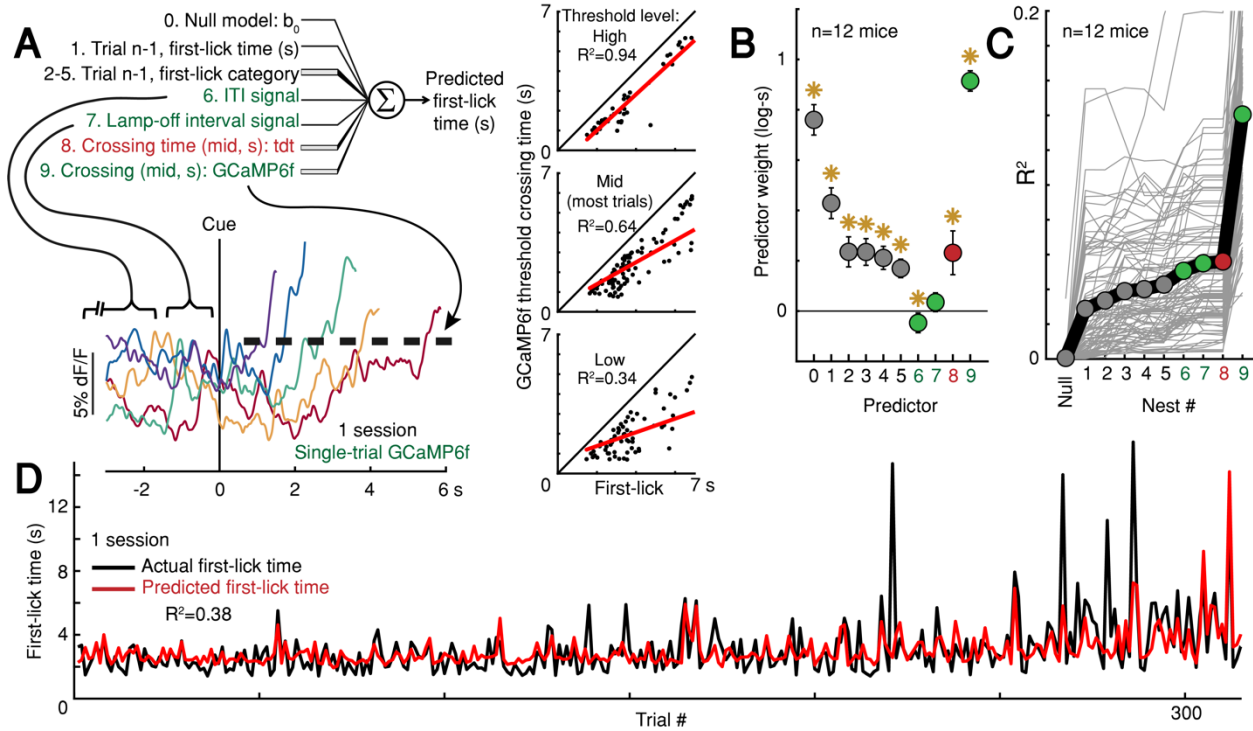

618  
619

620 **Figure 6.** Single-trial DAN signals predict first-lick timing. (A) Schematic of nested decoding model.  
621 Categories for  $n-1^{\text{th}}$  trial predictors: 2) reaction, 3) early, 4) reward, 5) ITI first-lick (see *Methods*).  
622 Bottom: single-trial cue-aligned Snc DAN GCaMP6f signals from one session (6 trials shown for  
623 clarity). Traces plotted up to first-lick. Right: threshold-crossing model. Low/Mid/High label  
624 indicates threshold amplitude. Dots: single trials. (B) Model weights. Error bars: 95% CI, \*,  $p < 0.05$ ,  
625 2-sided t-test. Numbers indicate nesting-order. (C) Variance explained by each model nest. Grey  
626 lines: single sessions; thick black line: average. For model selection, see *Figure 6—figure*  
627 *supplement 1C*. (D) Predicted vs. actual first-lick time, same session as 6A. See also *Figure 6—*  
628 *figure supplements 1-4*. Source data: *Figure 6—source data*.

629

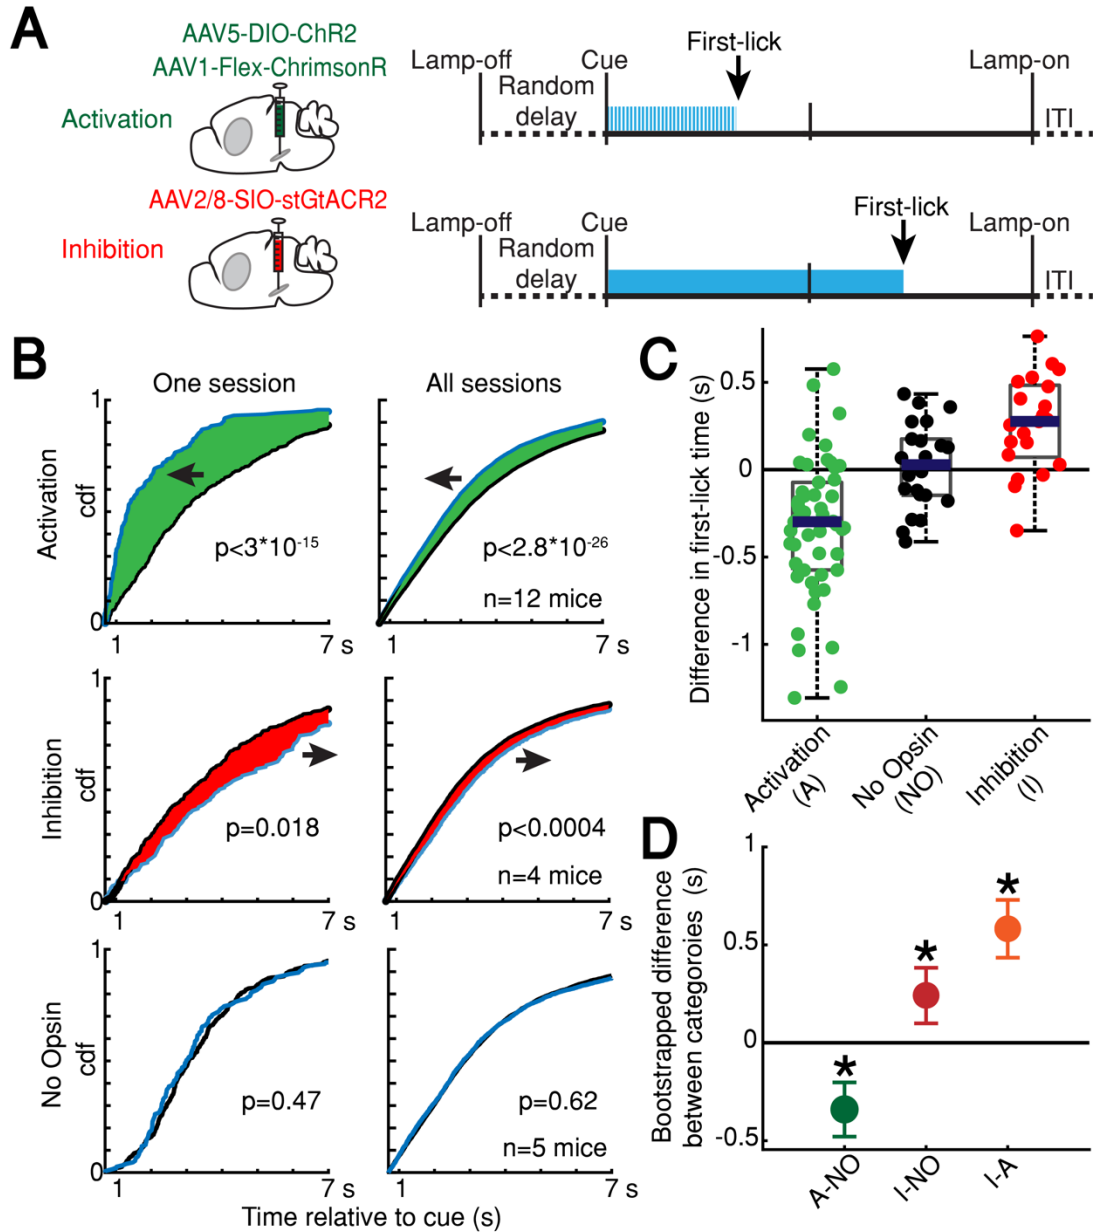

630  
631  
632  
633  
634  
635  
636  
637  
638  
639  
640  
641  
642  
643

**Figure 7.** Optogenetic DAN manipulation systematically and bidirectionally shifts the timing of self-timed movements. **(A)** Strategy for optogenetic DAN activation or inhibition. Mice were stimulated from cue-onset until first-lick or 7 s. **(B)** Empirical continuous probability distribution functions (cdf) of first-lick times for stimulated (blue line) versus unstimulated (grey line) trials. Arrow and shading show direction of effect. P-values calculated by Kolmogorov-Smirnov test (for other metrics, see *Figure 7—figure supplements 1-2*). **(C)** Mean 1,000,000x bootstrapped difference in first-lick time, stimulated-minus-unstimulated trials. Box: upper/lower quartile; line: median; whiskers: 1.5x IQR; dots: single sessions. **(D)** Comparison of mean first-lick time difference across all sessions. Error bars: 95% confidence interval (\*:  $p < 0.05$ , 1,000,000 bootstrapped mean difference in first-lick time between sessions of different stimulation categories). See also *Figure 7—figure supplements 1-4*. Source data: *Figure 7—source data*.

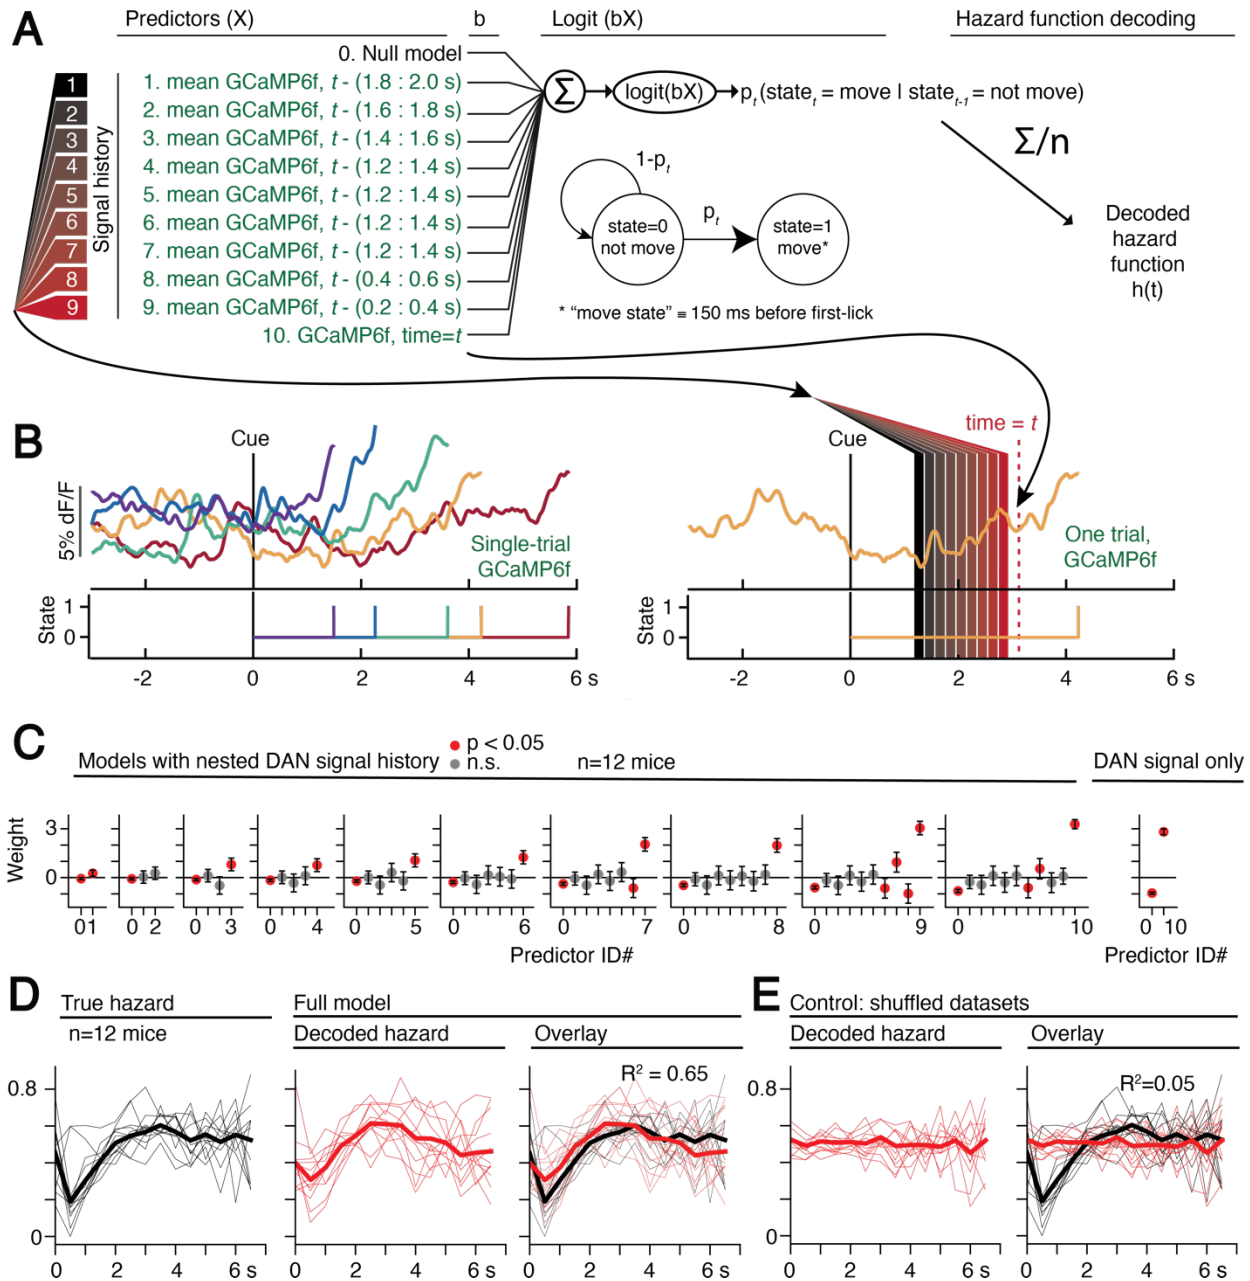

644

645

646

647

648

649

650

651

652

653

654

**Figure 8.** Single-trial dynamic dopaminergic signals predict the moment-to-moment probability of movement initiation. **(A)** Probabilistic movement-state model schematic. **(B)** Single-trial DAN GCaMP6f signals at SNc from one session. First-lick time truncated 150 ms before movement detection to exclude peri-movement signals. Bottom: Movement states for the trials shown as a function of time. Diagram on the right schematizes the model predictors relative to an example time= $t$  on a single trial. **(C)** Nested model fitted coefficients. **(D)** Decoded hazard functions from full model (with all 10 predictors). Thick line=mean. n=12 mice. **(E)** Hazard function fitting with shuffled datasets abolished the predictive power of the model (same 12 mice). See also *Figure 8—figure supplements 1-2*. Source data: *Figure 8—source data*.

## 655 MATERIALS AND METHODS

### 656 **Animals**

657 Adult male and female hemizygous DAT-cre mice (*Backman et al., 2006*)  
658 (B6.SJL-Slc6a3<sup>tm1.1(cre)Bkmm</sup>/J, RRID:IMSR\_JAX:020080; The Jackson Laboratory, Bar Harbor,  
659 ME) or *wt* C57/b6 mice were used in all experiments (> 2 months old at the time of surgery; median  
660 body weight 23.8g, range 17.3-31.9 g). Mice were housed in standard cages in a temperature and  
661 humidity-controlled colony facility on a reversed night/day cycle (12 h dark/12 h light), and  
662 behavioral sessions occurred during the dark cycle. Animals were housed with enrichment objects  
663 provided by the Harvard Center for Comparative Medicine (IACUC-approved plastic toys/shelters,  
664 e.g., Bio-Huts, Mouse Tunnels, Nest Sheets, *etc.*) and were housed socially whenever possible  
665 (1-5 mice per cage). All experiments and protocols were approved by the Harvard Institutional  
666 Animal Care and Use Committee (IACUC protocol #05098, Animal Welfare Assurance Number  
667 #A3431-01) and were conducted in accordance with the National Institutes of Health Guide for  
668 the Care and Use of Laboratory Animals.

669

### 670 **Surgery**

671 Surgeries were conducted under aseptic conditions and every effort was taken to minimize  
672 suffering. Mice were anesthetized with isoflurane (0.5-2% at 0.8 L/min). Analgesia was provided  
673 by *s.c.* 5 mg/kg ketoprofen injection during surgery and once daily for 3 d postoperatively (Ketofen,  
674 Parsippany, NJ). Virus was injected (50 nL/min) and the pipet remained in place for 10 min before  
675 removal. 200  $\mu$ m, 0.53 NA blunt fiber optic cannulae (Doric Lenses, Quebec, Canada) or tapered  
676 fiber optic cannulae (200  $\mu$ m, 0.60 NA, 2 mm tapered shank, OptogeniX, Lecce, Italy) were  
677 positioned at SNc, VTA or DLS and secured to the skull with dental cement (C&B Metabond,

678 Parkell, Edgewood, NY). Neck EMG electrodes were constructed from two Teflon-insulated 32G  
679 stainless steel pacemaker wires attached to a custom socket mounted in the dental cement. Sub-  
680 occipital neck muscles were exposed by blunt dissection and electrode tips embedded bilaterally.

681

## 682 **Stereotaxic coordinates (from bregma and brain surface)**

683 Viral Injection:

684 SNC: 3.16 mm posterior, +/- 1.4 mm lateral, 4.2 mm ventral

685 VTA: 3.1 mm posterior, +/-0.6 mm lateral, 4.2 mm ventral

686 DLS: 0 mm anterior, +/- 2.6 mm lateral, 2.5 mm ventral.

687 Fiber Optic Tips:

688 SNC/VTA: 4.0 mm ventral (photometry) or 3.9 mm ventral (optogenetics).

689 DLS: 2.311 mm ventral (blunt fiber) or 4.0 mm ventral (tapered fiber)

690

## 691 **Virus**

692 Photometry:

693 tdTomato (“tdt”): AAV1-CAG-FLEX-tdT (UNC Vector Core, Chapel Hill, NC), 100 nL

694 used alone or in mixture with other fluorophores (below), working concentration

695  $5.3 \times 10^{12}$  gc/mL

696 gCaMP6f (at SNC or VTA): 100 nL AAV1.Syn.Flex.GCaMP6f.WPRE.SV40

697 ( $2.5 \times 10^{13}$  gc/mL, Penn Vector Core, Philadelphia, PA). Virus was mixed in a 1:3 ratio

698 with tdt (200 nL total)

699 DA<sub>2m</sub> (at DLS): 200-300 nL AAV9-hSyn-DA4.4(DA2m) (working concentration:

700 *ca.*  $3 \times 10^{12}$  gc/mL, Vigene, Rockville, MD) + 100 nL tdt



701 dLight1.1 (at DLS): 300 nL AAV9.hSyn.dLight1.1.wPRE bilaterally at DLS (*ca.*  
702  $9.6 \times 10^{12}$  gc/mL, Children's Hospital Boston Viral Core, Boston, MA) + 100 nL  
703 AAV1.CB7.CI.TurboRFP.WPRE.rBG (*ca.*  $1.01 \times 10^{12}$  gc/mL, Penn Vector Core)  
704 Optogenetic stimulation/inhibition (all bilateral at SNc):  
705 ChR2: 1000 nL AAV5-EF1a-DIO-hChR2(H134R)-EYFP-WPRE-pA ( $3.2 \times 10^{13}$  gc/mL,  
706 UNC Vector Core, Chapel Hill, NC)  
707 ChrimsonR +/- dLight1.1: 700 nL AAV1-hSyn-FLEX-ChrimsonR-tdT ( $4.1 \times 10^{12}$  gc/mL,  
708 UNC Vector Core, Chapel Hill, NC) +/- 400-550 nL AAV9-hSyn-dLight1.1  
709 bilaterally at DLS (*ca.*  $10^{13}$  gc/mL, Lin Tian Lab, Los Angeles, CA)  
710 stGtACR2: 300 nL 1:10 AAV2/8-hSyn1-SIO-stGtACR2-FusionRed (working  
711 concentration  $4.7 \times 10^{11}$  gc/mL, Addgene/Janelia Viral Core, Ashburn, VA)  
712

### 713 **Water-deprivation and acclimation**

714 Animals recovered for 1 week postoperatively before water deprivation. Mice received daily water  
715 supplementation to maintain  $\geq 80\%$  initial body weight and fed *ad libitum*. Mice were habituated  
716 to the experimenter and their health was monitored carefully following guidelines reported  
717 previously (*Guo et al., 2014*). Training commenced when mice reached the target weight (~8-9 d  
718 post-surgery).

719

### 720 **Histology**

721 Mice were anesthetized with  $>400$  mg/kg pentobarbital (Somnasol, Henry Schein Inc, Melville,  
722 NY) and perfused with 10 mL 0.9% sodium chloride followed by 50mL ice-cold 4%  
723 paraformaldehyde in 0.1 M phosphate buffer. Brains were fixed in 4% paraformaldehyde at 4°C



724 for >24 hr before being transferred to 30% sucrose in 0.1 M phosphate buffer for >48 hr. Brains  
725 were sliced in 50  $\mu$ m coronal sections by freezing microtome, and fluorophore expression was  
726 assessed by light microscopy. The sites of viral injections and fiber optic placement were mapped  
727 with an Allen Mouse Brain Atlas.

728

### 729 **Behavioral rig, data acquisition and analysis**

730 A custom rig provided sensory cues, recorded events and delivered juice rewards under the control  
731 of a Teensy 3.2 microprocessor running a custom Arduino state-system behavioral program with  
732 MATLAB serial interface. Digital and analog signals were acquired with a CED Power 1400 data  
733 acquisition system/Spike2 software (Cambridge Electronic Design Ltd, Cambridge, England).  
734 Photometry and behavioral events were acquired at 1,000 Hz; movement channels were acquired  
735 at 2,000 Hz. Video was acquired with FlyCap2 or Spinnaker at 30 fps (FLIR Systems, Wilsonville,  
736 OR). Data were analyzed with custom MATLAB statistics packages.

737

### 738 **Self-timed movement task**

739 Mice were head-fixed with a juice tube positioned in front of the tongue. The spout was placed as  
740 far away from the mouth as possible so that the tongue could still reach it to discourage compulsive  
741 licking (*Guo et al., 2014*), ~1.5 mm ventral and ~1.5 mm anterior to the mouth. During periods  
742 when rewards were not available, a houselamp was illuminated. At trial start, the houselamp turned  
743 off, and a random delay ensued (0.4-1.5 s) before a cue (simultaneous LED flash and 3300 Hz  
744 tone, 100 ms) indicated start of the timing interval. The timing interval was divided into two  
745 windows, early (0-3.333 s in most experiments; 0-4.95 s in others) and reward (3.333-7 s; 4.95-10  
746 s), followed by the intertrial interval (ITI, 7-17 s; 10-20 s). The window in which the mouse first

747 licked determined the trial outcome (early, reward, or no-lick). An early first-lick caused an error  
748 tone (440 Hz, 200 ms) and houselamp illumination, and the mouse had to wait until the full timing  
749 interval had elapsed before beginning the ITI. Thus there was no advantage to the mouse of licking  
750 early. A first-lick during the reward window caused a reward tone (5050 Hz, 200 ms) and juice  
751 delivery, and the houselamp remained off until the end of the trial interval. If the timing interval  
752 elapsed with no lick, a time-out error tone played (131 Hz, 2 s), the houselamp turned on, and ITI  
753 commenced. During the ITI and pre-cue delay (“lamp-off interval”), there was no penalty for  
754 licking.

755  
756 Mice learned the task in 3 stages (*Figure 1—figure supplement 1A*). On the first 1-4 days of  
757 training, mice learned a beginner-level task, which was modified in two ways: 1) to encourage  
758 participation, if mice did not lick before 5 s post-cue, they received a juice reward at 5 s; and 2)  
759 mice were not penalized for licking in reaction to the cue (within 500 ms). When the mouse began  
760 self-triggering  $\geq 50\%$  of rewards (day 2-6 of training), the mouse advanced to the intermediate-  
761 level task, in which the training reward at 5 s was omitted, and the mouse had to self-trigger all  
762 rewards. After completing  $>250$  trials/day on the intermediate task (usually day 4-7 of training),  
763 mice advanced to the mature task, with no reaction licks permitted. All animals learned the mature  
764 task and worked for  $\sim 400$ -1,500 trials/session.

765  
766 **Hazard function correction of survival bias in the timing distribution**

767 The raw frequency of a particular response time in the self-timed movement task is “distorted” by  
768 how often the animal has the chance to respond at that time (*Anger, 1956*). This bias was corrected  
769 by calculating the hazard function, which takes into account the number of response opportunities

770 the animal had at each timepoint. The hazard function is defined as the conditional probability of  
771 moving at a time,  $t$ , given that the movement has not yet occurred (referred to as “IRT/Op” analysis  
772 in the old Differential Reinforcement of Low Rates (DRL) literature). The hazard function was  
773 computed by dividing the number of first-movements in each 250 ms bin of the first-lick timing  
774 histogram by the total number of first-movements occurring at that bin-time or later—the total  
775 remaining “opportunities.”

776

### 777 **Online movement monitoring**

778 Movements were recorded simultaneously during behavior with four movement-control  
779 measurements: neck EMG (band-pass filtered 50-2,000 Hz, 60 Hz notch, amplified 100-1,000x),  
780 back-mounted accelerometer (SparkFun Electronics, Boulder, CO), high-speed camera  
781 (30 Hz, FLIR Systems, Wilsonville, OR), and tdTomato photometry. All control signals contained  
782 similar information, and thus only a subset of controls was used in some sessions.

783

### 784 **Photometry**

785 Fiber optics were illuminated with 475 nm blue LED light (Plexon, Dallas, TX) (SNc/VTA: 50  $\mu$ W,  
786 DLS: 35  $\mu$ W) measured at patch cable tip with a light-power meter (Thorlabs, Newton, NJ). Green  
787 fluorescence was collected via a custom dichroic mirror (Doric Lenses, Quebec, Canada) and  
788 detected with a Newport 1401 Photodiode (Newport Corporation, Irvine, CA). Fluorescence was  
789 allowed to recover  $\geq 1$  d between recording sessions. To avoid crosstalk in animals with red control  
790 fluorophore expression, the red channel was recorded at one of the 3 sites (SNc, VTA, or DLS,  
791 550 nm lime LED, Plexon, Dallas, TX) while GCaMP6f, dLight1.1 or DA<sub>2m</sub> was recorded  
792 simultaneously only at the other implanted sites.

793

794 **dF/F**

795 Raw fluorescence for each session was pre-processed by removing rare singularities (single  
796 points >15 STD from the mean) by interpolation to obtain F(t). To correct photometry signals for  
797 bleaching, dF/F was calculated as:

798

$$\frac{dF}{F}(t) = \frac{F(t) - F_0(t)}{F_0(t)}$$

799

800

801 where  $F_0(t)$  is the 200 s moving average of F(t) (*Figure 2—figure supplement 1A*). We tested  
802 several other complementary methods for calculating dF/F and all reported results were robust to  
803 dF/F method (see *Methods: dF/F method characterization and validation*). To ensure dF/F signal  
804 processing did not introduce artifactual scaling or baseline shifts, we also tested several  
805 complementary techniques to isolate undistorted F(t) signals where possible and quantified the  
806 amount of signal distortion when perfect isolation was not possible (see *Methods: dF/F method*  
807 *characterization and validation*, below, and *Figure 2—figure supplement 1C*).

808

809 **dF/F method characterization and validation**

810 dF/F calculations are intended to reduce the contribution of slow fluorescence bleaching to fiber  
811 photometry signals, and many such methods have been described (*Kim et al., 2019; Mohebi et al.,*  
812 *2019; Soares et al., 2016*). However, dF/F methods have the potential to introduce artifactual  
813 distortion when the wrong method is applied in the wrong setting. Thus, to derive an appropriate  
814 dF/F method for use in the context of the self-timed movement task, we characterized and  
815 quantified artifacts produced by 4 candidate dF/F techniques.

816

817 *Detailed description of complementary dF/F methods.*

- 818 1. Normalized baseline: a commonly used dF/F technique in which each trial's  
819 fluorescence is normalized to the mean fluorescence during the 5 s preceding the trial.
- 820 2. Low-pass digital filter:  $F_0$  is the low-pass, digital infinite impulse response  
821 (IIR)-filtered raw fluorescence for the whole session (implemented in MATLAB with  
822 the built-in function *lowpass* with  $f_c=5 \cdot 10^{-5}$  Hz, steepness=0.95).
- 823 3. Multiple baseline: a variation of Method 1, in which each trial's fluorescence is  
824 normalized by the mean fluorescence during the 5 s preceding the current trial, as well  
825 as 5 trials before the current trial and 5 trials after the current trial.
- 826 4. Moving average:  $F_0$  is the 200 s moving average of the raw fluorescence at each point  
827 (100 s on either side of the measured timepoint).

828

829 Although *normalized baseline* (Method 1) is commonly used to correct raw fluorescence signals  
830 (F) for bleaching, this technique assumes that baseline activity has no bearing on the trial outcome;  
831 however, because the mouse decides when to move in the self-timed movement task, it is possible  
832 that baseline activity may differ systematically with the mouse's choice on a given trial. Thus,  
833 normalizing F to the baseline period would obscure potentially physiologically-relevant signals.  
834 More insidiously, if baseline activity *does* vary systematically with the mouse's timing,  
835 normalization can also introduce substantial amplitude scaling and y-axis shifting artifacts when  
836 correcting F with this method (*Figure 2—figure supplement 1C*, middle panels). Thus, Methods  
837 2-4 were designed and optimized to isolate photometry signals minimally distorted by bleaching  
838 signals and systematic baseline differences during the self-timed movement task. Methods 2-4

839 produced the same results in all statistical analyses, and the moving average method is shown in  
840 all figures.

841

842 *Isolating minimally-distorted photometry signals with paired trial analyses of raw fluorescence.*

843 Although slow bleaching prevents comparison of raw photometry signals (F) at one time in a  
844 behavioral session with those at another time, the time-course of appreciable bleaching was slow  
845 enough in the reported behavioral sessions that minimal bleaching occurred over the course of  
846 3 trials (~1 min, *Figure 2—figure supplement 1A*). Thus, to observe the most minimally-distorted  
847 photometry signals possible, we compared F between *pairs of consecutive* trials (*Figure 2—figure*  
848 *supplement 1B-C*). We compared F baseline signals between all paired trials in which an early  
849 trial (unrewarded first-lick between 0.7-2.9 s; abbreviated as “E”) was followed by a rewarded trial  
850 (first-lick between 3.4-7 s; abbreviated as “R”); this two-trial sequence is thus referred to as an  
851 “ER” comparison. To ensure systematic differences did not result from subtle bleaching in the  
852 paired-trial interval, we reversed the ordering contingency and also compared all Rewarded trials  
853 preceding Early trials (“RE” comparison). The same systematic relationship between baseline  
854 signals and first-lick time was found for paired trials analyzed by raw F (*Figure 2—figure*  
855 *supplement 1C, left panels*).

856

857 *Quantification of artifactual amplitude scaling/baseline shifts introduced by dF/F processing.*

858 Each Candidate dF/F Method was applied to the same Paired Trial datasets described above. The  
859 resulting paired-fluorescence datasets were normalized after processing (minimum dF/F=0,  
860 maximum=1). The amount of distortion introduced by dF/F was quantified with a Distortion Index  
861 (DI), which was calculated as:

862 Distortion Index,  $DI(t) = \text{abs}(F(t) - dF/F(t))$

863 where  $F(t)$  and  $dF/F(t)$  are the normalized, paired-trial raw fluorescence signal or  $dF/F$  signal at  
864 time  $t$ , respectively.  $t$  spanned from the beginning of the  $n-1^{\text{th}}$  trial (-20 s) to the end of the  $n^{\text{th}}$  trial  
865 (20 s), aligned to the cue of the  $n^{\text{th}}$  trial (*Figure 2—figure supplement 1C, bottom panels*). The  
866 DI shown in plots has been smoothed with a 200 ms moving average kernel for clarity.

867

868 As expected, normalizing fluorescence to the baseline period (*normalized baseline*) erased the  
869 correlation of baseline  $dF/F$  signals with first-lick time (*Figure 2—figure supplement 1C, middle*  
870 *panels*). More insidiously, this also resulted in distortion of GCaMP6f dynamics *during* the timing  
871 interval, evident in the diminished difference between E-signals compared to R-signals relative to  
872 the shapes observed in the raw fluorescence paired-trial comparison (*Figure 2—figure*  
873 *supplement 1C, middle-bottom panel*). However,  $dF/F$  Methods 2-4 visually and quantitatively  
874 recapitulated the dynamics observed in the raw fluorescence comparison (*Figure 2—figure*  
875 *supplement 1C, right panels*).

876

877 These results were corroborated by time-in-session permutation tests in which datasets for single  
878 sessions were divided into thirds (beginning of session, middle of session, and end of session). The  
879 differences between baseline and ramping dynamics observed in whole-session averages were  
880 present even within these shorter blocks of time within the session (*i.e.*, faster ramping and elevated  
881 baseline signals on trials with earlier self-timed licks). Furthermore, permutation tests in which the  
882 block identity (begin, middle, end) was shuffled showed that this pattern held when trials with  
883 earlier first-licks from the end of the session were compared with trials with later first-licks from  
884 the beginning of the session (and *vice versa*).

885

## 886 **Normalized dF/F for comparing dopamine sensor signals**

887 DA<sub>2m</sub> was about twice as bright as dLight1.1, and thus generally yielded larger and less noisy dF/F  
888 signals. To compare the two extracellular dopamine sensors in the same plot, dF/F was normalized  
889 for each signal by the amplitude of its lick-related transient. dF/F was calculated as usual, and then  
890 the mean baseline-to-transient peak amplitude was measured for trials with first-licks occurring  
891 between 2-3 s. Percentage NdF/F is reported as the percentage of this amplitude.

892

## 893 **Dopamine sensor kinetics**

894 dLight1.1 is an extracellular dopamine sensor derived from the dopamine-1-receptor, and has fast  
895 reported kinetics: rise  $t_{1/2} = 9.5 \pm 1.1$  ms, decay  $t_{1/2} = 90 \pm 11$  ms (*Patriarchi et al., 2018*). DA<sub>2m</sub> is  
896 a new extracellular dopamine indicator derived from the dopamine-2-receptor, which provides  
897 brighter signals. DA<sub>2m</sub> signals have been reported to decay slowly in slice preparations but are  
898 much faster *in vivo*, presumably because endogenous dopamine-clearance mechanisms are  
899 preserved: reported rise  $t_{1/2} \sim 50$  ms, decay  $t_{1/2} \sim 360$  ms in freely behaving mice; decay  $t_{1/2} \sim 190$  ms  
900 in head-fixed *drosophila* (*Sun et al., 2020*). To estimate the dopamine-sensor kinetics in our head-  
901 fixed mice, we examined the phasic fluorescence transient occurring on unrewarded first-licks  
902 (0.5-3.3 s), which showed a stereotyped fast rise and decay with both sensors (*Figure 2—figure*  
903 *supplement 2D-E*). While the transient was somewhat complex (reminiscent of phasic burst-pause  
904 responses sometimes observed for movement-related DAN activity (*Coddington and Dudman,*  
905 *2018, 2019*), we measured the time for average fluorescence to decay from the peak of the transient  
906 to half the baseline-to-peak amplitude. We found decay  $t_{1/2} \sim 75$  ms for dLight1.1 and  $t_{1/2} \sim 125$  ms  
907 for DA<sub>2m</sub> (*Figure 3—figure supplement 1*). Given that the dopaminergic ramping signals in our



908 study evolved over several seconds, the kinetics of both dopamine sensors are thus fast enough  
909 that they should not have caused appreciable distortion of the slow ramping dynamics.

910

### 911 **Pearson's correlation of baseline signals to first-lick time.**

912 The mean SNc GCaMP6f signal during the minimum lamp-off interval (-0.4 s to 0 s, the cue-time)  
913 was compared to the first-lick time for pooled trials in *Figure 2C* by calculating the Pearson  
914 correlation coefficient. There were at least 700 trials in each pooled set of trials (0.75-4 s included).

915

### 916 **DAN signal encoding model**

917 To test the independent contribution of each task-related input to the photometry signal and select  
918 the best model, we employed a nested fitting approach, in which each dataset was fit multiple times  
919 (in “nests”), with models becoming progressively more complex in subsequent nests. The nests fit  
920 to the GCaMP6f photometry data employed the inputs  $X^{(j)}$  at each  $j^{\text{th}}$  nest:

921 Null Model:  $X^{(0)} = x_0$

922 Nest 1:  $X^{(1)} = X^{(0)} + \text{tdTomato (tdt)}$

923 Nest 2:  $X^{(2)} = X^{(1)} + \text{cue} + \text{first-lick}$

924 Nest 3:  $X^{(3)} = X^{(2)} + \text{EMG/accelerometer}$

925 Nest 4:  $X^{(4)} = X^{(3)} + \text{time-dependent baseline offset}$

926 Nest 5:  $X^{(5)} = X^{(4)} + \text{stretch representing percentages of interval}$

927 Overfitting was penalized by ridge regression, and the optimal regularization parameter for each  
928 nest was obtained by 5-fold cross-validation to derive the final model fit for each session. Model  
929 improvement by each input was assessed by the percentage loss improvement at the nest where  
930 the input first appeared compared to the prior nest. The loss improvement of Nest 1 was compared

931 to the Null Model (the average of the photometry timeseries). The nested model of tdt control  
932 photometry signals was the same, except Nest 1 was omitted.

933

934 The GLM for each nest takes the form:

$$935 \quad Y = \Theta X^{(j)}$$

936 Where  $Y$  is the  $1 \times n$  vector of the photometry signal across an entire behavioral session ( $n$  is the  
937 total number of sampled timepoints);  $X^{(j)}$  is the  $d \times n$  design matrix for nest  $j$ , where the rows  
938 correspond to the  $d_j$  predictors for nest  $j$  and the columns correspond to each of the  $n$  sampled  
939 timepoints of  $Y$ ; and  $\Theta$  is the  $d \times 1$  vector of fit weights.

940

941  $Y$  is the concatenated photometry timeseries taken from trial start (lights off) to the time of first  
942 lick. Because of day-to-day/mouse-to-mouse variation (ascribable to many possible sources, *e.g.*,  
943 different neural subpopulations, expression levels, behavioral states, *etc.*), each session was fit  
944 separately.

945

946 The  $d_j$  design matrix predictors were each scaled (maximum amplitude 1) and grouped by input to  
947 the model. The timing-independent inputs were: 1. Null offset ( $x_0$ , 1 predictor), 2. tdt (1 predictor),  
948 3. cue (24 predictors), 4. first-lick (28 predictors), and 5. EMG/accelerometer (44 predictors). The  
949 timing-dependent inputs were: 6. timing-dependent baseline offset (1 predictor), 7. stretch  
950 (500 predictors).

951

952 To reduce the number of predictors, the cue, first-lick and EMG/accelerometer predictors  
953 (*Figure 5—figure supplement 1C*) were composed from sets of basis kernels as described

954 previously (*Park et al., 2014; Runyan et al., 2017*). The cue basis kernels were spaced 0-500 ms  
955 post-cue and first-lick basis kernels were spaced -500 ms-0 ms relative to first-lick, the typically-  
956 observed windows of stereotypical sensory and motor-related neural responses. For nuisance  
957 movements (EMG/accelerometer), events were first discretized by thresholding (*Figure 5—*  
958 *figure supplement 1B*) and then convolved with basis kernels spanning -500 to 500 ms around the  
959 event. This window was consistent with the mean movement-aligned optical artifact observed in  
960 the tdt channel. The timing-dependent baseline offset was encoded as a constant offset spanning  
961 from lamp-off until first-lick, with amplitude taken as linearly proportional to the timed interval  
962 on the current trial. The timing-dependent stretch input was composed of 500 predictors, with each  
963 predictor containing 1's tiling 0.05% of the cue-to-lick interval, and 0's otherwise (*Figure 5—*  
964 *figure supplement 1D*). Importantly, the stretch was not constrained in any way to form ramps.  
965  
966 Basis sets were optimized to minimize Training Loss, as calculated by mean squared error of the  
967 unregularized model:

$$968 \quad \operatorname{argmin}_{\mathbf{X}^{(i)}} (\text{Training Loss}(\Theta) = 1/n * (\mathbf{Y} - \Theta \mathbf{X}^{(i)})^2)$$

969  
970 Superfluous basis set elements that did not improve Training Loss compared to the Null Model  
971 were not included in the final model. Goodness of the training fit was assessed by Akaike  
972 Information Criterion (AIC), Bayesian Information Criterion (BIC),  $R^2$ , and Training Loss. The  
973 optimal, regularized model for each nest/session was selected by 5-fold cross-validation in which  
974 the regularization parameter,  $\lambda_j$ , was optimized for minimal average Test Loss:

$$975 \quad \operatorname{argmin}_{\lambda_j} (\text{Test Loss}(\Theta, \lambda_j) = 1/n * (\mathbf{Y} - \Theta \mathbf{X}^{(i)})^2 + \lambda_j |\Theta|^2)$$

976

977 Test Loss for each optimal model was compared across nests to select the best model for each  
978 session. Models were refit with the optimal  $\lambda_j$  to obtain the final fit.

979

980 Model error was simulated 1,000 times by redrawing  $\Theta$  coefficients consistent with the data  
981 following the method described by Gelman and Hill (*Gelman and Hill, 2006*), and standard errors  
982 were propagated across sessions. The absolute value of each predictor was summed and divided  
983 by the total number of predictors for that input to show the contribution of the input to the model  
984 (*Figure 5—figure supplement 1G*). To simulate the modeled session's photometry signal for each  
985 nest  $j$ ,  $Y_{fit}$  was calculated as  $\Theta X^{(j)}$  and binned by the time of first-lick relative to the cue. The error  
986 in the simulation was shown by calculating  $Y_{fit_{sim}} = \Theta_{sim} X^{(j)}$  for 300 simulated sets of  $\Theta_{sim}$ .

987

### 988 **Principal component analysis (PCA)**

989 Unsmoothed ramping intervals for photometry timeseries were fit with PCA and reconstructed  
990 with the first three principal components (PCs). To derive a PCA fit matrix with ramping intervals  
991 of the same number of samples, the length of each trial was scaled up by interpolation to the  
992 maximum ramping interval duration:

993  $7 \text{ s} - 0.7 \text{ s cue buffer} - 0.6 \text{ s first-lick buffer} = 5.7 \text{ s: } 5,700 \text{ sample ramping interval}$

994 Following PC-fitting, datasets were down-sampled to produce a fit of the correct time duration.

995 Trials where the ramping interval was  $<0.1 \text{ s}$  were excluded to exclude noise from down-sampling.

996

### 997 **First-lick time decoding model**

998 A nested, generalized linear model was derived to predict the first-lick time on each trial in a  
999 session and quantify the contribution of previous reward history and photometry signals to the  
1000 prediction. The model was of the form:

$$1001 \quad \log(y) = bx$$

1002 where  $y$  is the first-lick time,  $b$  is a vector of fit coefficients and  $x$  is a vector of predictors. The  
1003 nested model was constructed such that predictors occurring further back in time (such as reward  
1004 history) and confounding variables (such as tdt photometry signals) were added first to determine  
1005 the additional variance explained by predictors occurring closer to the time of first-lick, which  
1006 might otherwise obscure the impact of these other variables. The predictors, in order of nesting,  
1007 were:

1008 Nest 0:  $b_0$  (Null model, average log-first-lick time)

1009 Nest 1:  $b_1 = b_0 +$  first-lick time on previous trial (trial “n-1”)

1010 Nest 2-5:  $b_2 = b_1 +$  previous trial outcome (1,0)\*

1011 Nest 6:  $b_3 = b_2 +$  median photometry signal in 10s window before lamp-off (“ITI”)

1012 Nest 7:  $b_4 = b_3 +$  median photometry signal from lamp-off to cue (“lamp-off interval”)

1013 Nest 8:  $b_5 = b_4 +$  tdt threshold crossing time\*\*

1014 Nest 9:  $b_6 = b_5 +$  GCaMP6f threshold crossing time\*\*

1015

1016 where all predictors were normalized to be in the interval (0,1).

1017

1018 \* Outcomes included (in order of nest): Reaction (first-lick before 0.5 s), Early (0.5-3.333 s),

1019 Reward (3.333-7 s), ITI (7-17 s). No-lick was implied by all four outcomes encoded as zeros.

1020 \*\* Details on threshold-crossing time and alternative models included in *Methods: Derivation of*  
1021 *threshold and alternative decoding models.*

1022

1023 To exclude the sensory- and motor-related transients locked to the cue and the first-lick events in  
1024 the threshold-crossing nests, the ramping interval was conservatively defined as 0.7 s post-cue up  
1025 until 0.6 s before first-lick, and the minimum ramping interval for fitting was 0.1 s. Thus, for a  
1026 trial to be included in the model, the first lick occurred between 1.4 s to 17 s (end of trial).

1027

1028 Initial model goodness of fit was assessed by  $R^2$ , mean-squared loss and BIC. Models were 5-fold  
1029 cross-validated with ridge regression at each nest to derive the final models, as described above.  
1030 95% confidence intervals on model coefficients were calculated by 2-sided t-test with standard  
1031 errors propagated across sessions.

1032

### 1033 **Derivation of threshold and alternative decoding models**

#### 1034 *Derivation of threshold models*

1035 As a metric of the predictive power of ramping DAN signals on first-lick time, we derived a  
1036 threshold-crossing model. A threshold-crossing event was defined as the first time after the cue  
1037 when the photometry signal exceeded and remained above a threshold level up until the time of  
1038 first-lick on each trial. Importantly, while the analysis approach is reminiscent of pacemaker-  
1039 accumulator models for timing, we make no claims that the analysis is evidence for pacemaker-  
1040 accumulator models. Rather threshold-crossing times provided a convenient metric to compare the  
1041 rate of increase in signals between trials.

1042

1043 Photometry timeseries for GCaMP6f and tdt were de-noised by smoothing with a 100 ms Gaussian  
1044 kernel (kernel was optimized by grid search of kernels ranging between 0-200 ms to minimize  
1045 noise without signal distortion). To completely exclude the sensory- and motor-related transients  
1046 locked to the cue and the first-lick events, the ramping interval was conservatively defined as 0.7  
1047 s post-cue up until 0.6 s before the first-lick. To eliminate chance crossings due to noise, we  
1048 imposed a stiff, debounced threshold condition: to be considered a threshold crossing event, the  
1049 photometry signal had to cross the threshold from low-to-high and remain above this level until  
1050 the end of the ramping interval.

1051  
1052 To derive an unbiased threshold for each session, we tested 100 evenly-spaced candidate threshold  
1053 levels spanning the minimum-to-maximum photometry signal during the ramping interval for each  
1054 session. Depending on threshold level, some trials never crossed, *i.e.*, signal always remained  
1055 below threshold or started and ended above threshold. Thus, the lowest candidate threshold for  
1056 which there was a maximum number of trials crossing during the timing interval was selected as  
1057 the “mid-level” threshold-crossing point. This threshold was specific to each photometry signal  
1058 tested on each session. Threshold-crossing time was included in the decoding model as the  
1059 normalized time on the ramping interval (0,1). If a trial never crossed threshold, it was encoded as  
1060 a zero. If no trials ever crossed threshold, the threshold predictor was encoded as a vector of ones,  
1061 thus penalizing the model for an additional predictor but providing no new information.

1062

### 1063 *Multi-threshold Model*

1064 An alternative model employed 3 unbiased thresholds: 1) the lowest threshold with  $\geq 50$  trials  
1065 crossing (“min”); 2) the lowest threshold with the most crossings (“mid,” described above); and 3)

1066 the highest threshold with  $\geq 50$  trials crossing (“max”). For tdt datasets, trials rarely met the  
1067 monotonic threshold constraint (usually the signals oscillated above and below the threshold  
1068 throughout the ramping interval, failing to meet the debouncing constraint). Thus, to include tdt  
1069 signals as conservatively as possible, we relaxed the 50-trial minimum constraint, taking the  
1070 threshold with the most trials crossing, which was usually around 10 or fewer. The addition of  
1071 more thresholds did not substantially improve the cross-validated model compared to the single-  
1072 threshold model (*Figure 6—figure supplement 1*).

1073

1074 *Principal component analysis (PCA) threshold-crossing models*

1075 In another version of the decoding model, the threshold-crossing procedures were applied to  
1076 ramping intervals fit with the first three PCs (as described in *Methods: Principal Component*  
1077 *Analysis (PCA)*) to derive a PCA version of the single-threshold and multi-threshold models. PCA  
1078 analysis on tdt datasets showed no consistent PCs, and thus these PCs were not included in the  
1079 decoding model. Instead, the actual tdt data was employed in the threshold model as in the other  
1080 models described.

1081

1082 **Hierarchical Bayesian Modeling of Single-trial Dynamics.**

1083 The probability of each single-trial SNc GCaMP6f signal belonging to a ramp vs. step Model Class  
1084 was determined via Hierarchical Bayesian Model fitting with probabilistic programs written in the  
1085 novel probabilistic programming language, Gen.jl, which is embedded in the Julia Programming  
1086 Language (*Cusumano-Towner et al., 2019*). The top of the model hierarchy was the model class  
1087 (linear ramp vs. step function) and the lower level was the respective parameterization of the two  
1088 model classes (described below).



1089

1090 The probability of the step vs. ramp model class was inferred with data-driven inference. The best  
1091 fit (step or ramp and parameterization) for each trial was calculated across 20 iterations (Gen  
1092 *Traces*) of hierarchical modeling with 50 rounds of probabilistic refinement (computation *via* Gen  
1093 Importance Resampling) per iteration (in model testing, models typically converged to their  
1094 steady-state probability of model class within only 30 rounds of refinement, but 50 rounds were  
1095 used conservatively to reduce the likelihood of suboptimal classifications).

1096

1097 *Data-driven inference procedure*: Each iteration of model fitting began at the top level of the  
1098 hierarchy with a coin toss: with 50% probability, the probabilistic program would initialize with a  
1099 model of either the Ramp or Step class. For data-driven inference, a Gen *Proposal* for the  
1100 parameterization for this model class was then probabilistically generated. Data-driven proposals  
1101 were designed to improve fitting efficiency and reduce computation time, and this allowed for  
1102 faster convergence and better model fits as determined by the fit log-likelihood. The proposal  
1103 heuristics were as follows:

1104 Ramp model: A data-driven proposal was generated by dynamic noise random sample  
1105 consensus (RANSAC (*Cusumano-Towner and Mansinghka, 2018*)) with additional data-driven  
1106 constraints (see function `ransac_assisted_model_selection_proposal` in the Gen Github  
1107 files):

1108 1. SLOPE,  $a$ . The maximum data-supported slope was used to set the variance of slope  
1109 sampling:

1110  $a \sim \text{Gaussian}(\text{RANSAC-sampled slope}, \text{maxslope}/2)$ .

1111 where *maxslope* was defined as the difference of the maximum and minimum signal within the  
1112 trial dataset divided by the total duration of the trial (by definition, the largest slope supported  
1113 by the data).

1114 2. INTERCEPT,  $b$ . The initial search for the intercept (“ $b$ -max”) was calculated as the  
1115 intercept for the calculated *maxslope* parameter), and this was used to set the noise level  
1116 on sampling of the intercept parameter:

$$1117 \quad b \sim \text{Gaussian}(\text{RANSAC-sampled intercept}, b\text{-max}/2)$$

1118 3. NOISE,  $\sigma$ . Parametrized noise level was sampled as:

$$1119 \quad \sigma \sim \text{Beta}(\alpha, \beta)$$

1120 where  $\alpha, \beta$  are the parameters of the beta distribution with mode=std(signal).

1121

1122 Step model: The data-driven proposal included two constraints/heuristics:

1123 1. STEPTIME. *Derivative constraint*: To avoid sampling all unlikely step-times, *steptimes*  
1124 were sampled uniformly from the timepoints where the derivative of the signal was in the  
1125 highest 5% of the signal’s derivative across the trial dataset:

$$1126 \quad \textit{steptime} \sim \textit{uniform}(\textit{indices of 95}^{\textit{th}} \textit{percentile of derivative of the signal})$$

1127 2. LEFT and RIGHT SEGMENTS. Once a *steptime* was sampled, likely *left* and *right*  
1128 segment amplitudes were sampled near the mean of the signal on either side of the step,  
1129 *e.g.*:

$$1130 \quad \textit{left} \sim \textit{Gaussian}(\textit{mean}(\textit{signal left of steptime}), \textit{std}(\textit{signal left of steptime}))$$

$$1131 \quad \textit{right} \sim \textit{Gaussian}(\textit{mean}(\textit{signal right of steptime}), \textit{std}(\textit{signal right of steptime}))$$

1132 3. NOISE,  $\sigma$ . The noise level was sampled as in the ramp model,

$$1133 \quad \sigma \sim \text{Beta}(\alpha, \beta)$$

1134           except  $\alpha, \beta$  were the parameterization of a Beta distribution with mode equal to the  
1135           standard deviation of the signal left of *steptime*.

1136

1137   After model initialization for each Trace, 50 rounds of Importance Resampling of the hierarchical  
1138   model were then conducted, each time randomly generating ramp or step hypotheses from the  
1139   proposal heuristics. On each round, the best fitting hypothesis was retained, such that each of the  
1140   20 Trace iterations of model classification returned one optimized model from the 50 rounds of  
1141   Importance Resampling.

1142

1143   The probability of the model class for each single-trial was then defined as the proportion of the  
1144   20 Trace iterations that found the optimal model to be derived from that model class (*e.g.*, if the  
1145   model returned 15 step-fits and 5 ramp-fits, the  $p(\text{ramp})$  was 0.25). Examples of the 20 Trace  
1146   iterations for two sample trials are shown in *Figure 6—figure supplement 2B*.

1147

1148   To determine whether the step model detected step-functions in the GCaMP6f dataset, the step  
1149   model was inferred alone to find step-fits for every trial, and single-trial signals were realigned to  
1150   the optimal *steptime* (GCaMP6f, tdTomato, EMG, *Figure 6—figure supplement 4A-B*).

1151

1152   **Single-trial dynamics analysis with geometric modeling (“Multiple threshold modeling”).**

1153   The multi-threshold procedure described above was also employed to determine whether single-  
1154   trial ramping dynamics were more consistent with a continuous ramp *vs.* discrete step dynamic on  
1155   single-trials. The threshold-crossing time for each trial was regressed against its first-lick time, and  
1156   the slope of this relationship was reported, as well as the variance explained.

1157

1158 **Single-trial variance analysis for discrete step dynamics.**

1159 For discrete step single trial dynamics to produce ramping on average, the time of the step across  
1160 trials must be distributed throughout the trial interval (importantly, a peri-motor spike occurring  
1161 consistently just before first-lick *cannot* give rise to continuous ramping dynamics on average).  
1162 As such, the variance in the GCaMP6f signals across trials for similar first-lick times should be  
1163 minimal near the time of the cue (when few trials have stepped) *and* near the time of the first-lick  
1164 (when all of the trials have stepped). This predicts an inverted-U shaped relationship of signal  
1165 variance across trials *vs.* position in the timing interval.

1166

1167 To compare variance across trials equitably, trials were first aligned to the cue and pooled by first-  
1168 lick time in pools of 1s each (1-2 s, 2-3 s, *etc.*) truncating at the earliest first-lick time within the  
1169 pool. The variance in GCaMP6f signals across trials within a pool was quantified in 10% percent  
1170 increments of time from the cue up to the earliest first-lick time in the pool (*i.e.*, 1-2 s pool truncated  
1171 at 1 s, divided into 100 ms increments). Measuring variance by percent of elapsed time within pool  
1172 allowed pooling of trials across the entire session. The shape of the variance *vs.* percent of timed  
1173 interval elapsed was compared to the inverted-U shape prediction to assess for discrete step  
1174 dynamics.

1175

1176 **Optogenetics—determining the physiological range for activation experiments**

1177 To test whether optogenetic manipulations during the self-timing task were in the physiological  
1178 range, we assessed the magnitude of the effect of activation on dopamine release in the DLS by  
1179 simultaneous photometry recordings with optical activation (*Figure 7—figure supplement 2*). In

1180 two DAT-cre mice, we expressed ChrimsonR bilaterally in SNc DANs and the fluorescent  
1181 dopamine indicator dLight1.1 bilaterally in DLS neurons. SNc cell bodies were illuminated  
1182 bilaterally (ChrimsonR 550 nm lime or 660 nm crimson, 0.5-5 mW) on 30% of trials (10 Hz, 10  
1183 or 20 ms up-time starting at cue onset and terminating at first-lick). dLight1.1 was recorded with  
1184 35  $\mu$ W 475 nm blue LED light at DLS. To avoid cross-talk between the stimulation LED and the  
1185 photometry recording site, the brief stimulation up-times were omitted from the photometry signal  
1186 and the missing points filled by interpolation between the adjacent timepoints.

1187

1188 In a few preliminary sessions, we also explored whether we could evoke short-latency licking (*i.e.*,  
1189 within a few hundred ms of the stimulation) if light levels were increased above the physiological  
1190 range for DAN signals. Rather than eliciting immediate licking, higher light levels produced bouts  
1191 of rapid, nonpurposeful limb and trunk movements throughout stimulation, and task execution was  
1192 disrupted. The animals appeared to have difficulty coordinating the extension of the tongue to  
1193 touch the lick spout. Simultaneous DLS dopamine detection showed large, sustained surges in  
1194 dopamine release throughout the period of stimulation, with an average amplitude comparable to  
1195 that of the reward transient (*Figure 7—figure supplement 2, right*). This extent of dopamine  
1196 release was never observed during unstimulated trials. Consequently, to avoid overstimulation in  
1197 activation experiments, we kept light levels well below those that generated limb and trunk  
1198 movements.

1199

## 1200 **Optogenetics—naïve/expert control sessions.**

1201 To determine whether optogenetic stimulation directly elicited or prevented licking, licking  
1202 behavior was first tested outside the context of the self-timed movement task on separate sessions

1203 in the same head-fixed arena but with no cues or behavioral task. Opsin-expressing mice were  
1204 tested before any exposure to the self-timed movement task (“Naïve”) as well as after the last day  
1205 of behavioral recording (“Expert”). In ChR2 control sessions, stimulation (5 mW 425 nm light, 3 s  
1206 duration, 10 Hz, 20% duty cycle) was applied randomly at the same pace as in the self-timed  
1207 movement task. stGtACR2 control sessions were conducted similarly (12 mW 425 mW light, 3 s  
1208 duration, constant illumination); but to examine if inhibition could block ongoing licking, we  
1209 increased the baseline lick-rate by delivering juice rewards randomly (5% probability checked  
1210 once every 5 s).

1211

#### 1212 **Optogenetics—self-timed movement task.**

1213 SNc DANs were optogenetically manipulated in the context of the 3.3 s self-timed movement task.  
1214 To avoid overstimulation, light levels were adjusted to be subthreshold for eliciting overt  
1215 movements as described above, and mice were not stimulated on consecutive days.

1216

1217 Activation: SNc cell bodies were illuminated bilaterally (ChR2: 0.5-5 mW 425 nm blue LED light;  
1218 ChrimsonR 550 nm lime or 660 nm crimson) on 30% of trials (10 Hz, 10 or 20% duty cycle  
1219 starting at cue onset and terminating at first-lick). DAN terminals in DLS were stimulated  
1220 bilaterally via tapered fiber optics on separate sessions.

1221 Inactivation: SNc cell bodies were illuminated bilaterally (stGtACR2: 12 mW 425 nm blue light)  
1222 on 30% of trials (constant illumination starting at cue onset and terminating at first lick).

1223

1224 **Quantification of optogenetic effects.**

1225 The difference in the distribution of trial outcomes between stimulated and unstimulated trials on  
1226 *each session* was quantified in four ways.

1227 1. 2-Sample Unsigned Kolmogorov-Smirnov Test.

1228 2. Difference in empirical continuous probability distribution function (cdf). The difference  
1229 in the integral of the stimulated and unstimulated cdf (dAUC) was calculated for each  
1230 session from 0.7-7 s. Effect size was quantified by permutation test, wherein the identity  
1231 of each trial (stimulated or unstimulated) was shuffled, and the distribution of dAUCs for  
1232 the permuted cdfs was calculated 10,000x. Results were reported for all sessions.

1233 3. Difference in mean movement time. Movement times on stimulated and unstimulated trials  
1234 were pooled and the distribution of movement time differences was determined by non-  
1235 parametric bootstrap, in which a random stimulated and unstimulated trial were drawn from  
1236 their respective pools 1,000,000x and the difference taken. The mean of each session's  
1237 bootstrapped distribution was compared across sessions by the 1,000,000x bootstrapped  
1238 difference of the mean between sessions of different categories.

1239 4. Difference in median movement time. Same as above but with median.

1240

1241 **Single-trial probabilistic movement state decoding model.**

1242 The probability of transitioning to a movement state,  $s_t=1$ , at time= $t$  was decoded with a logistic  
1243 generalized linear model of the form:

1244 
$$p(s_t=1) = \text{logit}(bX_t)$$

1245 where  $X_t$  is a vector of predictors for the timepoint,  $t$ , and  $b$  is the vector of fit coefficients. The  
1246 vector of predictors was comprised of the GCaMP6f signal at every timepoint (the current time,  $t$ )

1247 as well as the signal history, represented as 200 ms-wide signal averages moving back in time from  
1248  $t$ . Previous trial history ( $n-1^{\text{th}}$  and  $n-2^{\text{th}}$  first-lick times and reward/no-reward outcomes) did not  
1249 contribute significantly to the model during model selection and were thus omitted (see Model  
1250 Selection, below).

1251  
1252 Movement state,  $s_t$ , was defined as a binary variable, where state=0 represented all timepoints  
1253 between the cue up until 160 ms before the first-lick detection (to exclude any potential peri-  
1254 movement responses), and state=1 represented the timepoint 150 ms before the first-lick. Because  
1255 there were many more state=0 than state=1 samples in a session, state=0 points were randomly  
1256 down-sampled such that states were represented equally in the fit. To avoid randomly sampling a  
1257 particular model fit by chance, each dataset was fit on 100 randomly down-sampled (bootstrapped)  
1258 sets, and the average fit across these 100 sets was taken as the model fit for the session.

1259  
1260 GCaMP6f signals were smoothed with a 100 ms gaussian kernel and down-sampled to 100 Hz.  
1261 The GCaMP6f predictors were then nested into the model starting with those furthest in time from  
1262 the current timepoint,  $t$ :

1263  
1264 Nest 0:  $b_0$  (Null model)  
1265 Nest 1:  $b_1 = b_0 + \text{mean GCaMP6f } 1.8:2.0 \text{ s before current time}=t$   
1266 Nest 2:  $b_2 = b_1 + \text{mean GCaMP6f } 1.6:1.79 \text{ s before current time}=t$   
1267 Nest 3:  $b_3 = b_2 + \text{mean GCaMP6f } 1.4:1.59 \text{ s before current time}=t$   
1268 Nest 4:  $b_4 = b_3 + \text{mean GCaMP6f } 1.2:1.39 \text{ s before current time}=t$   
1269 Nest 5:  $b_5 = b_4 + \text{mean GCaMP6f } 1.0:1.19 \text{ s before current time}=t$



1270 Nest 6:  $b_6 = b_5 + \text{mean GCaMP6f } 0.8:0.99 \text{ s before current time}=t$   
1271 Nest 7:  $b_7 = b_6 + \text{mean GCaMP6f } 0.6:0.79 \text{ s before current time}=t$   
1272 Nest 8:  $b_8 = b_7 + \text{mean GCaMP6f } 0.4:0.59 \text{ s before current time}=t$   
1273 Nest 9:  $b_9 = b_8 + \text{mean GCaMP6f } 0.2:0.39 \text{ s before current time}=t$   
1274 Nest 10:  $b_{10} = b_9 + \text{GCaMP6f signal at current time}=t$

1275

1276 Nesting the predictors from most distant in time to most recent permitted observation of the ability  
1277 of more proximal signal levels to absorb the variance contributed by more distant signal history.

1278

1279 The fitted hazard function was then found as the average probability of being in the movement  
1280 state across all trials in the session as calculated from the average model fit. Because  $s_t=0$  states  
1281 were significantly down-sampled during fitting, this rescaled the fit hazard. Thus, to return the fit  
1282 hazard to the scale of the hazard function calculated from the behavioral distribution, both the fit  
1283 hazard and true hazard function were normalized on the interval (0,1), and the goodness of fit was  
1284 assessed by  $R^2$  comparison of the fit and true hazard functions. This metric was similar between  
1285 individual session fits as well as the grand-average fit across all animals and sessions.

1286

1287 To guard against overfitting, this procedure was repeated on the same datasets, except the datasets  
1288 were shuffled before fitting to erase any non-chance correlations between the predictors and the  
1289 predicted probability of being in the movement state.

1290

1291 *Model selection*

1292 To evaluate the contribution of task performance history to the probability of being in the  
1293 movement state at time= $t$ , we could not observe every timepoint in the GCaMP6f trial period  
1294 timeseries as we did in the final model because the trial history for a given timepoint was the same  
1295 for all other points in the trial; hence this created bias because the movement state=1 was  
1296 represented for all trials, but the likelihood of the a trial's 0 state being represented after down-  
1297 sampling was dependent on the duration of the trial (*i.e.*, first-lick time). Consequently, model  
1298 selection was executed on a modified version of the model that ensured that each trial would only  
1299 be represented *one time at most* in the fit. Because this greatly reduced the power of the model,  
1300 model selection was conducted on sessions from the two animals with the highest S:N ratio and  
1301 most trials to ensure the best chance of detecting effects of each predictor (*Figure 8—figure*  
1302 *supplement 1*).

1303

1304 The set of permutations of GCaMP6f signal and task history were fit separately, and the best model  
1305 selected by BIC (though notably AIC and AICc were in agreement with the BIC selection). Each  
1306 model was fit in “time-slices”—windows of 500 ms from the time of the cue up until the first-lick.  
1307 Only one point for each trial was fit within this window to ensure the movement state within the  
1308 window was uniquely represented. For each time-slice model, the GCaMP6f signal for each trial  
1309 was thus averaged within the time-slice window, and the movement state was 1 only if the  
1310 movement state occurred sometime within the window. The model fit for a session was taken as  
1311 the average model fit across each of the time-slices. Notably, a time-slice required a sufficient  
1312 number of trials to be present (either in the  $s_t=0$  or terminating in the movement state  $s_t=1$ ) for the  
1313 fit to converge; once the first-lick occurred for a trial, it did not contribute data to later time-slices.

1314 The source data files for *Figure 8—figure supplement 1* contain plots of all time-slice coefficient  
1315 fits, including for models with insufficient numbers of trials to converge.

1316

1317 **Code Availability.** All custom behavioral software and analysis tools are available with sample  
1318 datasets at <https://github.com/harvardschoolofmouse>.

1319

1320 **Data Availability.** All datasets supporting the findings of this study are publicly available  
1321 <https://www.dropbox.com/sh/g671nzziba405e3/AAByufom8BYs7PctECCbdiPua?dl=0>

1322 (Repository to be moved to Zenodo for publication). Source data files have been provided for all  
1323 figures.

1324

## 1325 ACKNOWLEDGEMENTS

1326 We thank D. Chicharro, J.G. Mikhael, S.J. Gershman, K. Reinhold, S. Panzeri, R. Bliss and  
1327 E.N. Brown for discussions on analytical methods; J. Tenenbaum, C. Wong, and A. Lew for their  
1328 instruction and advice pertaining to probabilistic programming in Gen; V. Berezovskii, J. LeBlanc,  
1329 T. LaFratta, O. Mazor, P. Gorelik, J. Markowitz, A. Lutas, K.W. Huang, L. Hou, S.J. Lee and  
1330 N.E. Ochandarena for technical assistance; and B. Sabatini, C. Harvey, S.R. Datta, M. Andermann,  
1331 L. Tian and W. Regehr for reagents. The work was supported by NIH grants UF-NS108177 and  
1332 U19-NS113201, and NIH core grant EY-12196. A.E.H. was supported by a Harvard Lefler  
1333 Predoctoral Fellowship and a Stuart H.Q. & Victoria Quan Predoctoral Fellowship at Harvard  
1334 Medical School. The funders had no role in study design, data collection and interpretation, or the  
1335 decision to submit the work for publication.

1336

1337 **AUTHOR CONTRIBUTIONS**

1338 A.E.H. and J.A.A conceived the project. A.E.H. performed all experiments. G.S. assisted with  
1339 experiments using tapered fiber optics; Y.H. assisted with optogenetic no-opsin control  
1340 experiments. F.S. and Y.L. developed the dopamine sensor, DA<sub>2m</sub>. A.E.H. and J.A.A. analyzed the  
1341 data and wrote the paper.

1342

1343 **COMPETING INTERESTS**

1344 J.A.A. is a co-founder of OptogeniX, which produces the tapered optical fibers used in some  
1345 experiments.

1346 SUPPLEMENTAL FIGURES

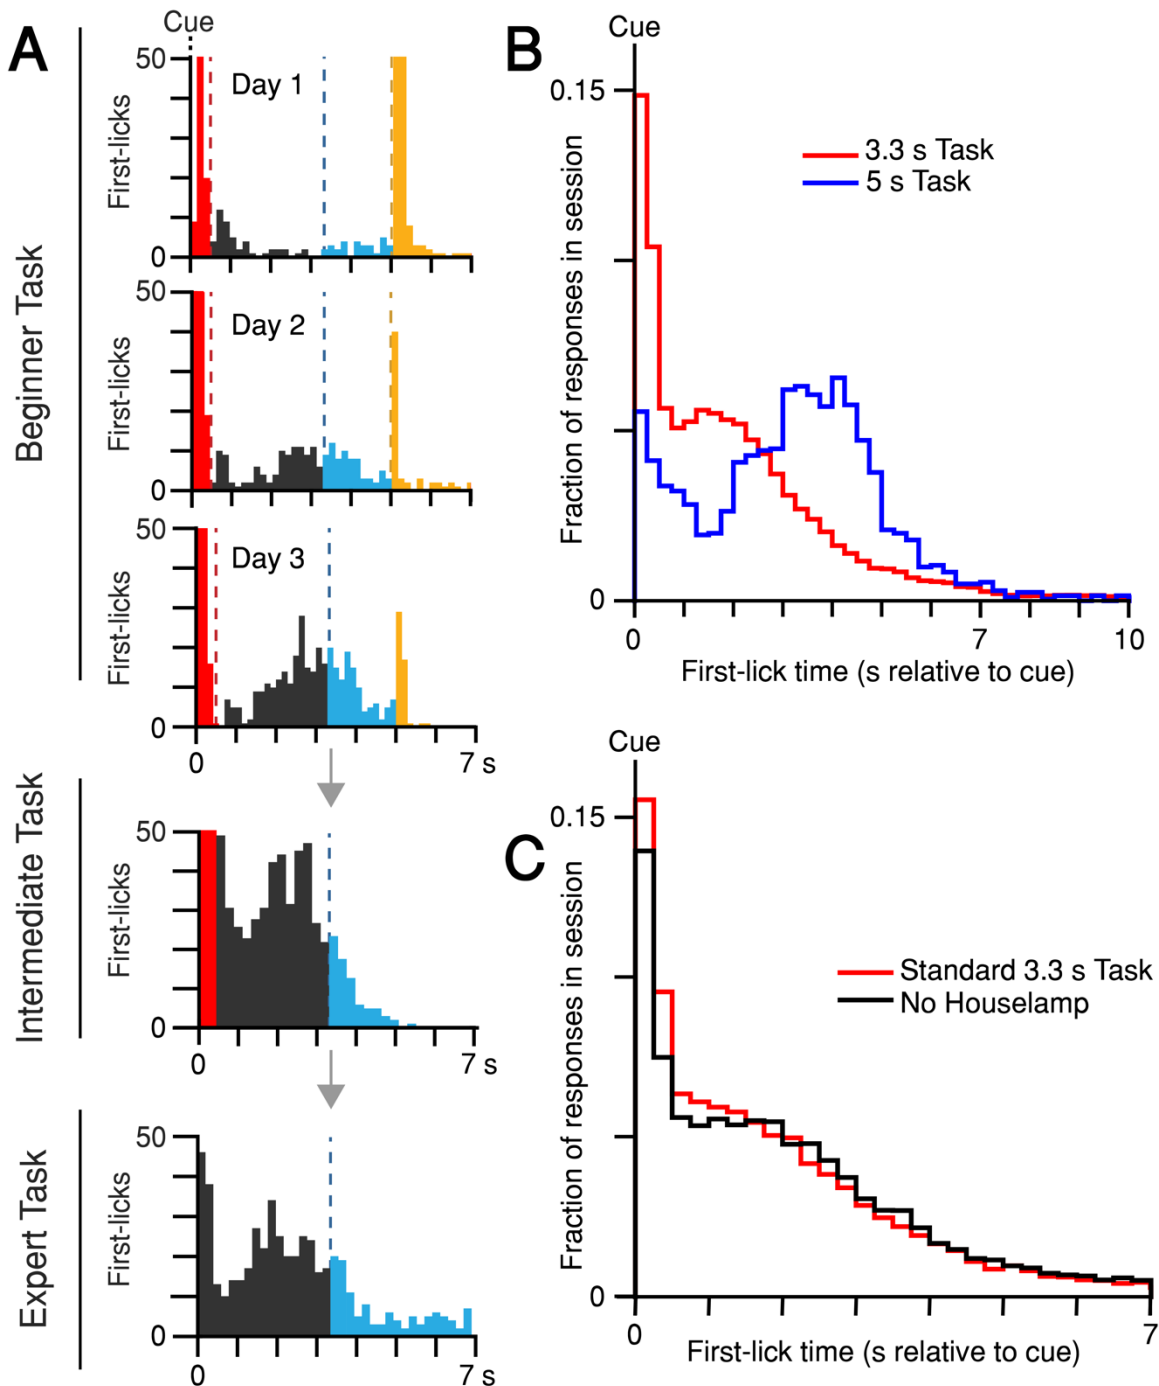

1347 **Figure 1—figure supplement 1.** Self-timed movement task learning and variations. (A) Task learning.  
1348 Histogram of first-lick times from single sessions at different stages of training (red: reaction, grey: early,  
1349 blue: operant-rewarded, yellow: Pavlovian-rewarded). Bars >50 first-licks truncated for clarity. (B) Mice  
1350 adjust behavior to the timing-contingencies of the task. First-lick time distributions from tasks with different  
1351 target timing intervals. Red: 3.3 s reward-boundary. Blue: 5 s reward-boundary (all sessions, all mice). (C)  
1352 Mice time their first-licks relative to the start cue, not the houselamp. First-lick time distributions during  
1353 behavior with (red) and without (black) houselamp events (4 mice, 4-5 sessions/mouse on each version of  
1354 the task). Source data: *Figure 1—source data*.

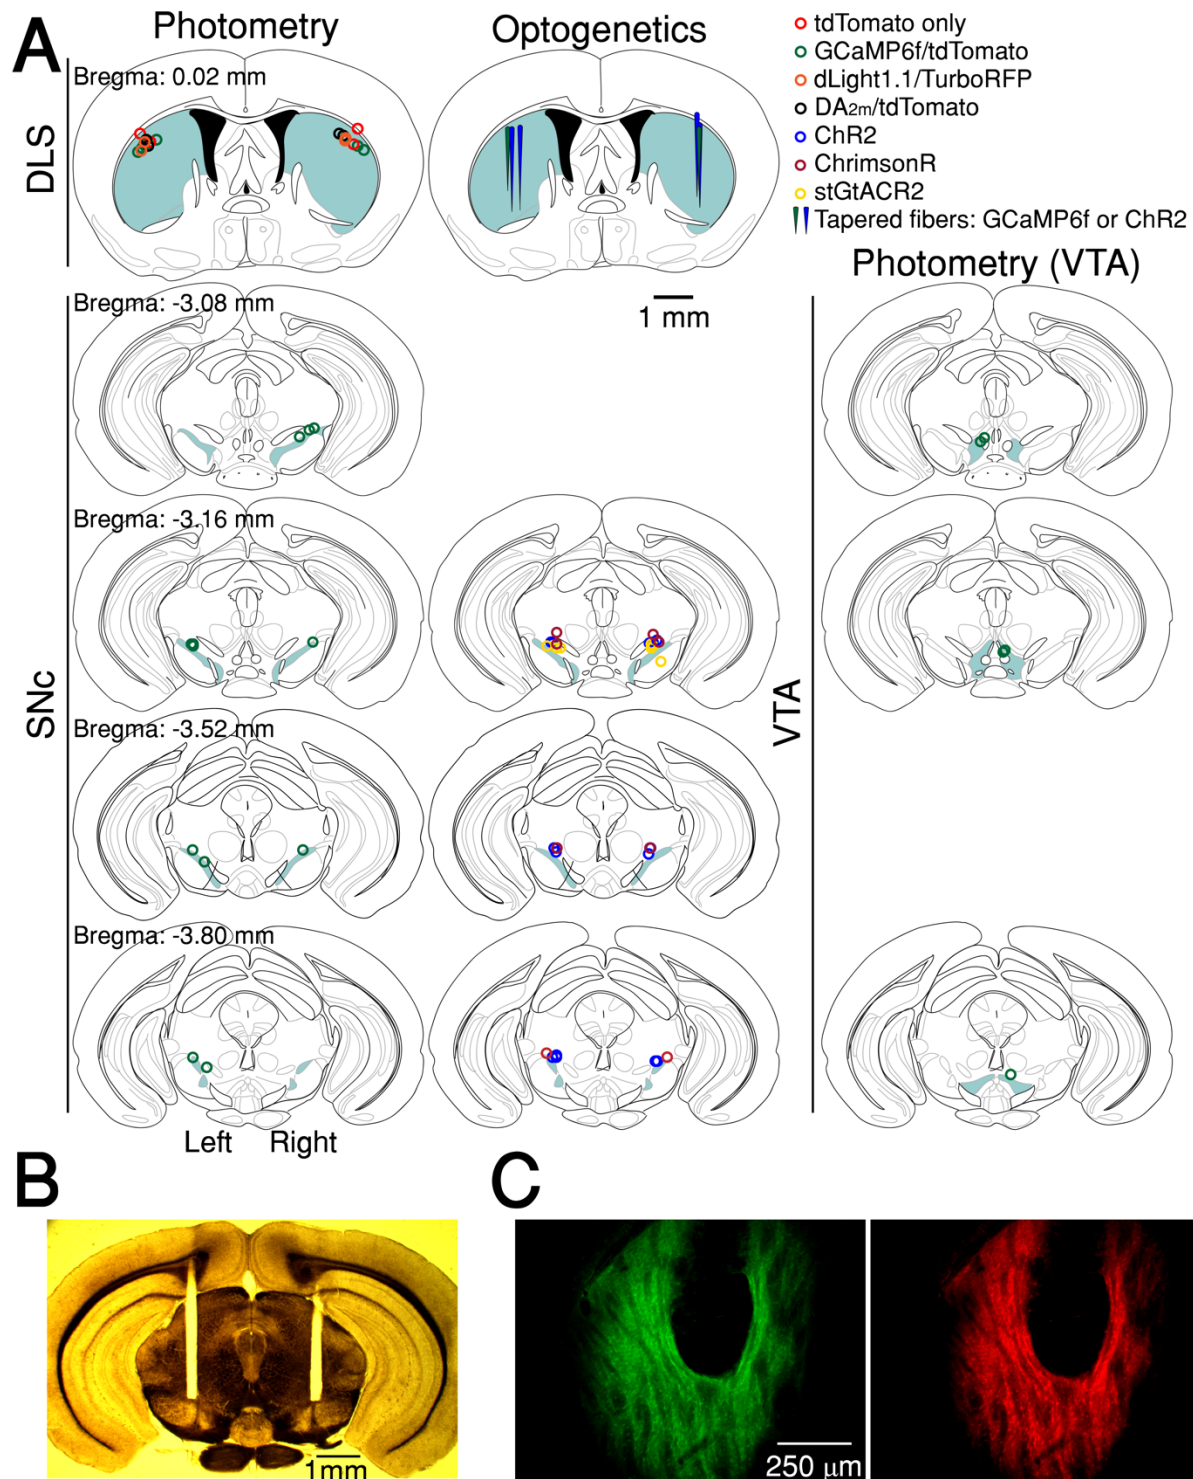

1355

1356

1357

1358

1359

**Figure 1—figure supplement 2.** Fiber optic placement and histology. (A) Approximate fiber positions for all mice. (B) Brightfield microscopy with polarized filter on a freshly-cut brain slice showing bilateral fiber placement at SNC (from stGtACR2 experiment). (C) Example of co-expression of green (DA<sub>2m</sub>) and red (tdTomato) fluorophores relative to fiber optic tip.

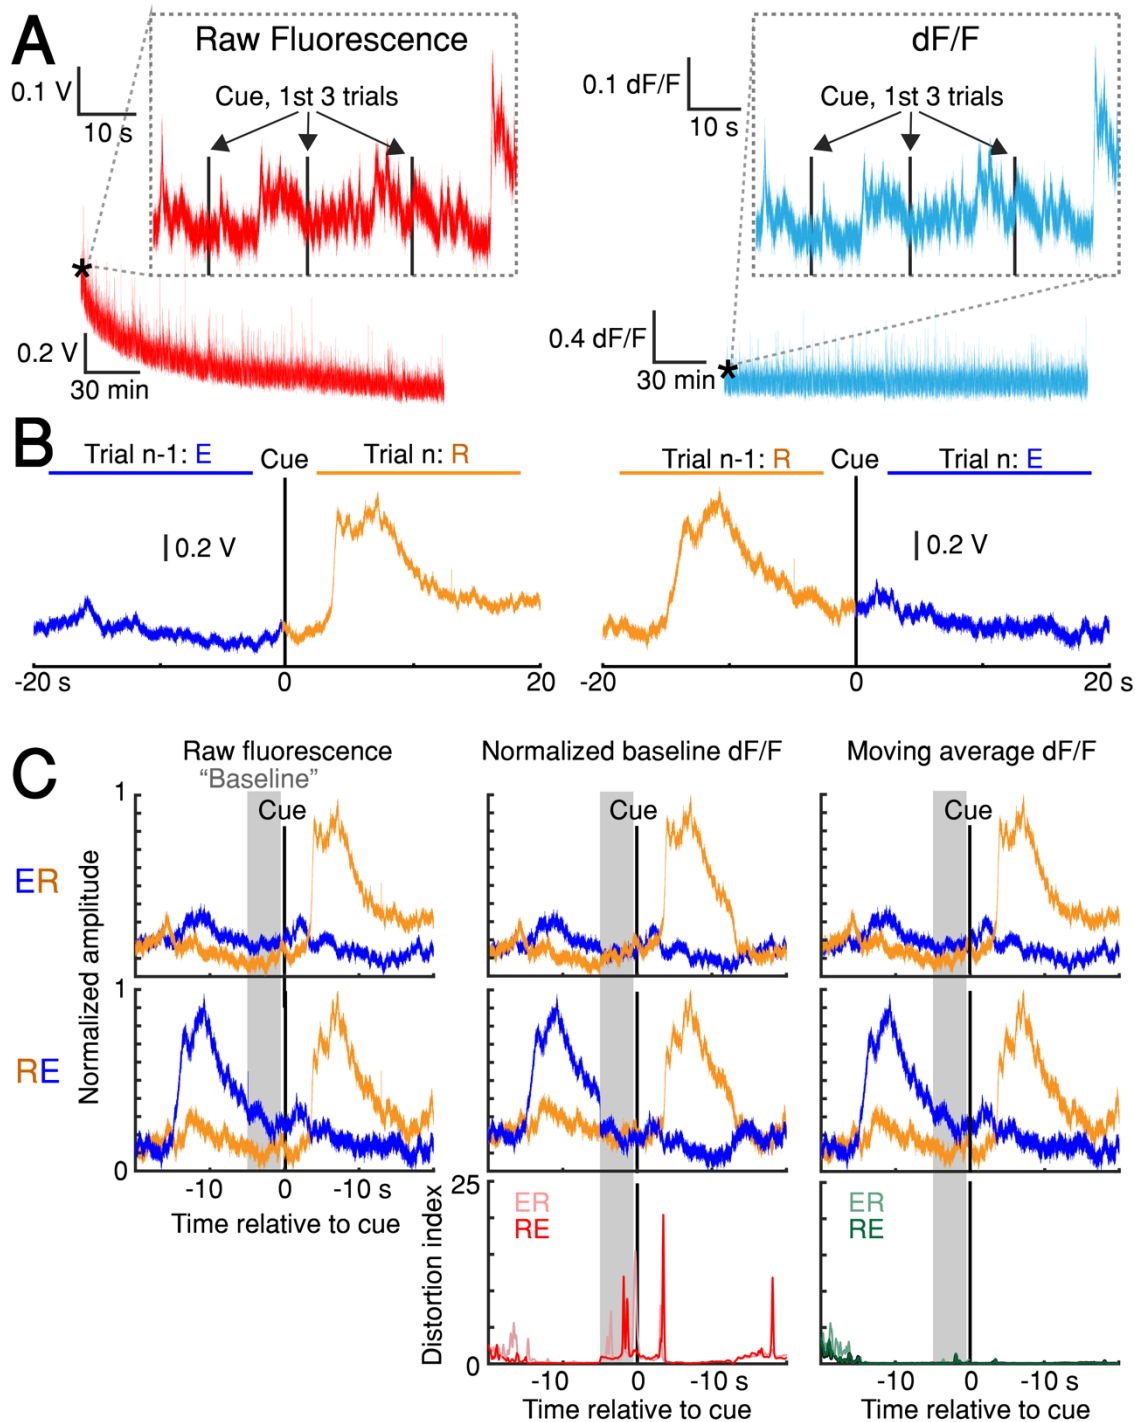

1360  
1361  
1362  
1363  
1364  
1365  
1366  
1367  
1368  
1369  
1370  
1371  
1372

**Figure 2—figure supplement 1.  $dF/F$  method validation.** (A) Left: slow, raw fluorescence bleaching across one session. Left inset: Minimal bleaching occurs across the first 3 trials (~1 min). Right:  $dF/F$  removes slow bleaching dynamics. Right inset: The same 3-trial window shown for  $dF/F$  signal. (B) Average raw fluorescence on paired, consecutive trials from one session aligned to cue on the  $n^{\text{th}}$  trial. Left:  $n-1^{\text{th}}$  trial was early,  $n^{\text{th}}$  trial was rewarded (“ER” condition). Right: “RE” condition (See [Methods:  \$dF/F\$  method characterization and validation](#)). (C) Comparison of baseline GCaMP6f signals on paired, consecutive trials aligned to cue. Columns: three different versions of the signal (Raw fluorescence, Normalized baseline  $dF/F$  method, Moving average  $dF/F$  method). Top row: ER condition; middle row: RE condition; bottom row: distortion index. Red distortion index plot shows only Normalized baseline method. Green distortion index plot shows overlay of Moving Average, Low-Pass Filter, and Multiple Baseline  $dF/F$  Methods because the difference in signal distortion between these methods was indistinguishable (See [Methods:  \$dF/F\$  method characterization and validation](#)). Source data: [Figure 2—source data](#).



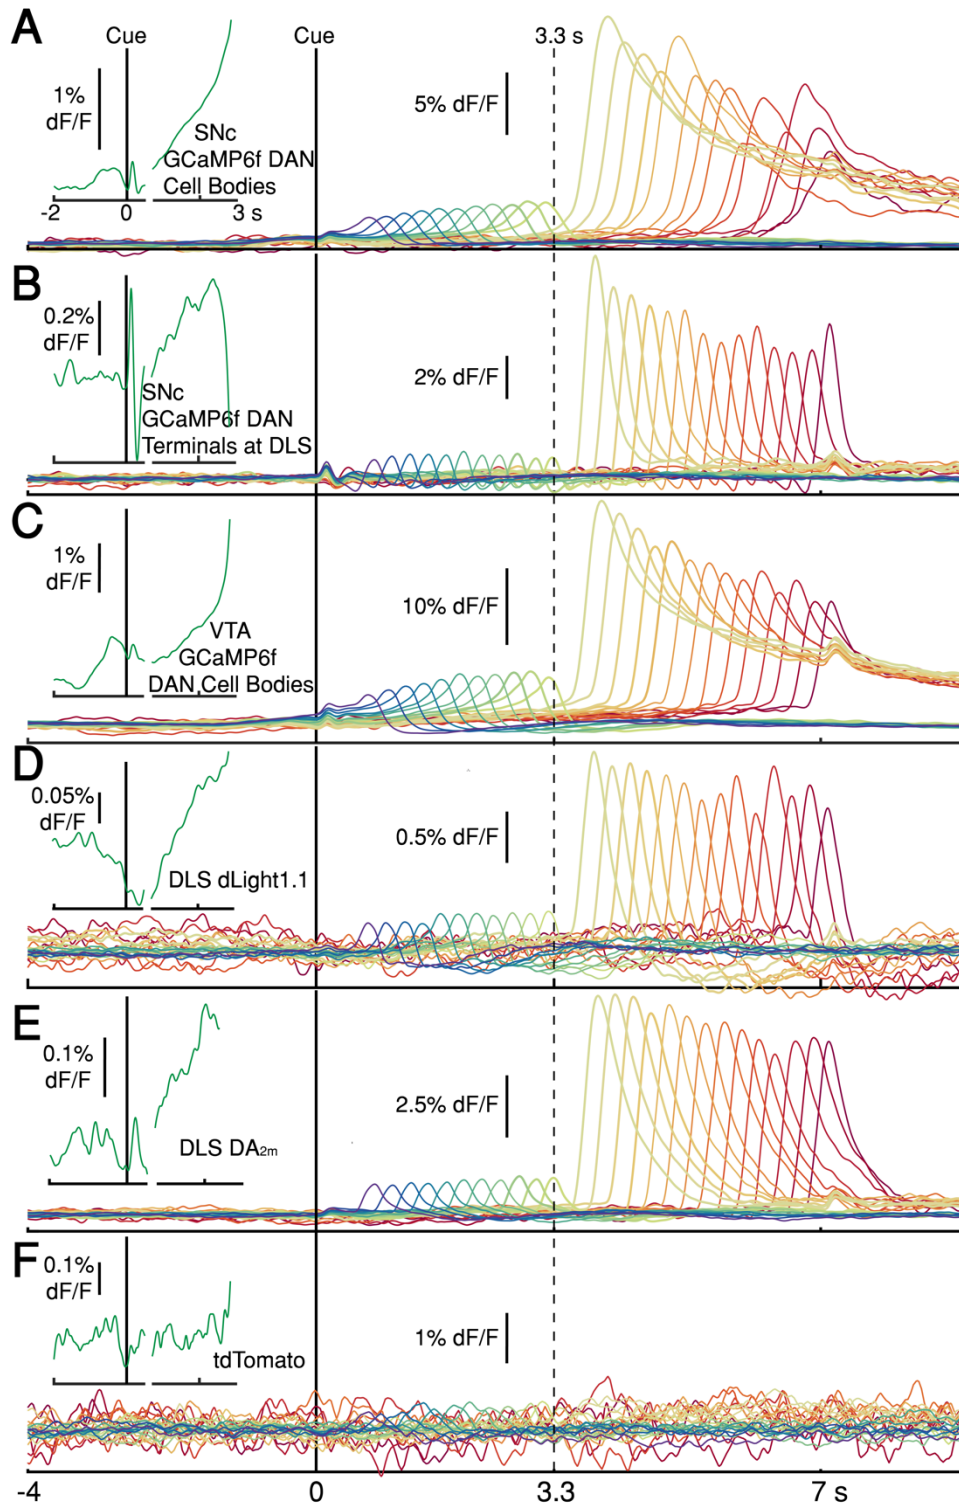

**Figure 2—figure supplement 2.** Average photometry signals, pooled every 250 ms by first-lick time, spanning 0.5 s (purple) to 7 s (red). Signals in main panels aligned only to cue, not first-lick. **(A)** Average DAN GCaMP6f signals at SNc cell bodies (12 mice). **(B)** DAN GCaMP6f signals at axon terminals in DLS (10 mice). **(C)** Striatal dopamine detection with dLight1.1 at DLS (5 mice). **(D)** Striatal DA<sub>2m</sub> signals at DLS (4 mice). **(E)** DAN GCaMP6f signals at VTA cell bodies (4 mice). **(F)** tdTomato signals. **Insets (left):** Cue and lick-aligned average signals for a single time bin before first-lick to show pre-lick ramping present in all dopaminergic signals. Left of axis break: aligned to cue. Right of axis break: aligned to first-lick. Traces plotted up until 150 ms before first-lick. Source data: *Figure 2—source data*.



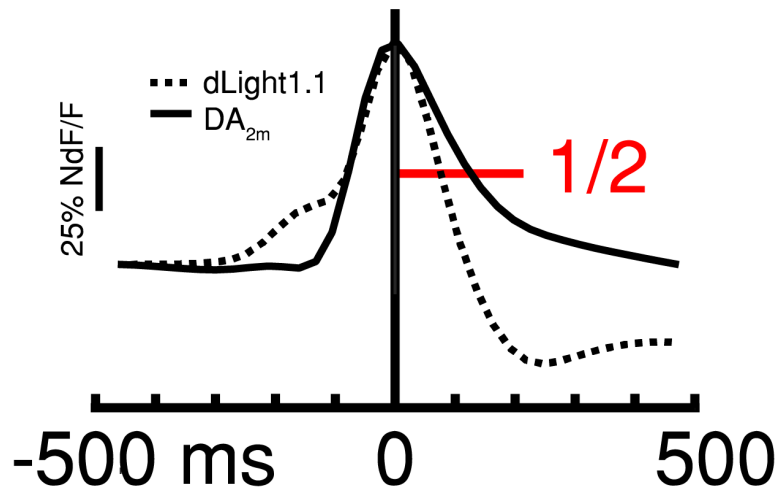

1373  
1374

1375

1376

1377

1378

**Figure 3—figure supplement 1.** Comparison of dLight1.1 (dashed) and DA<sub>2m</sub> (solid) kinetics surrounding peak of unrewarded transient (first-lick: 0.5-3.3 s). Red line: 1/2 baseline-to-peak amplitude for measuring decay t<sub>1/2</sub> (see *Methods*). Source data: *Figure 3—source data*.

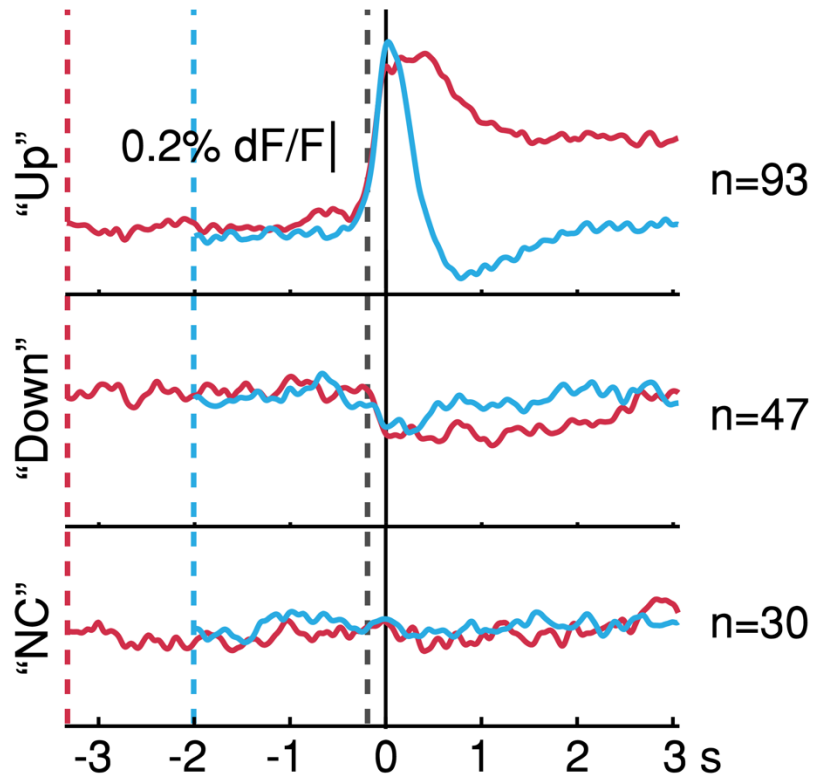

tdTomato optical artifact direction: % of sessions

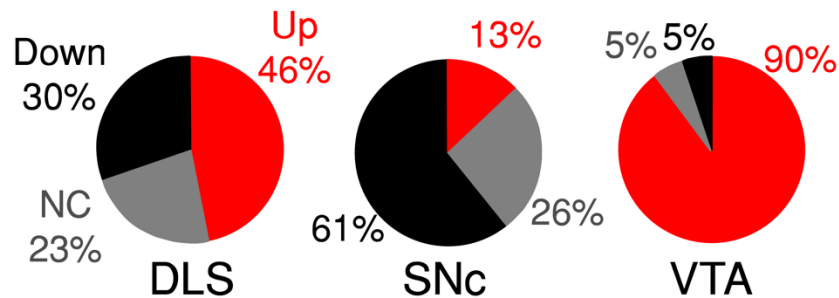

1379  
1380

1381 **Figure 4—figure supplement 1.** Average tdTomato optical artifacts (aligned to first-lick time)  
1382 showed inconsistent directions even within the same session. Averages for all three types of artifact  
1383 (consistently up, “Up”; consistently down, “Down”; and not consistent “NC”) shown for all sessions.  
1384 Pie plots: Breakdown of average tdt artifact direction by session at each recording site. Source data:  
1385 *Figure 4—source data.*

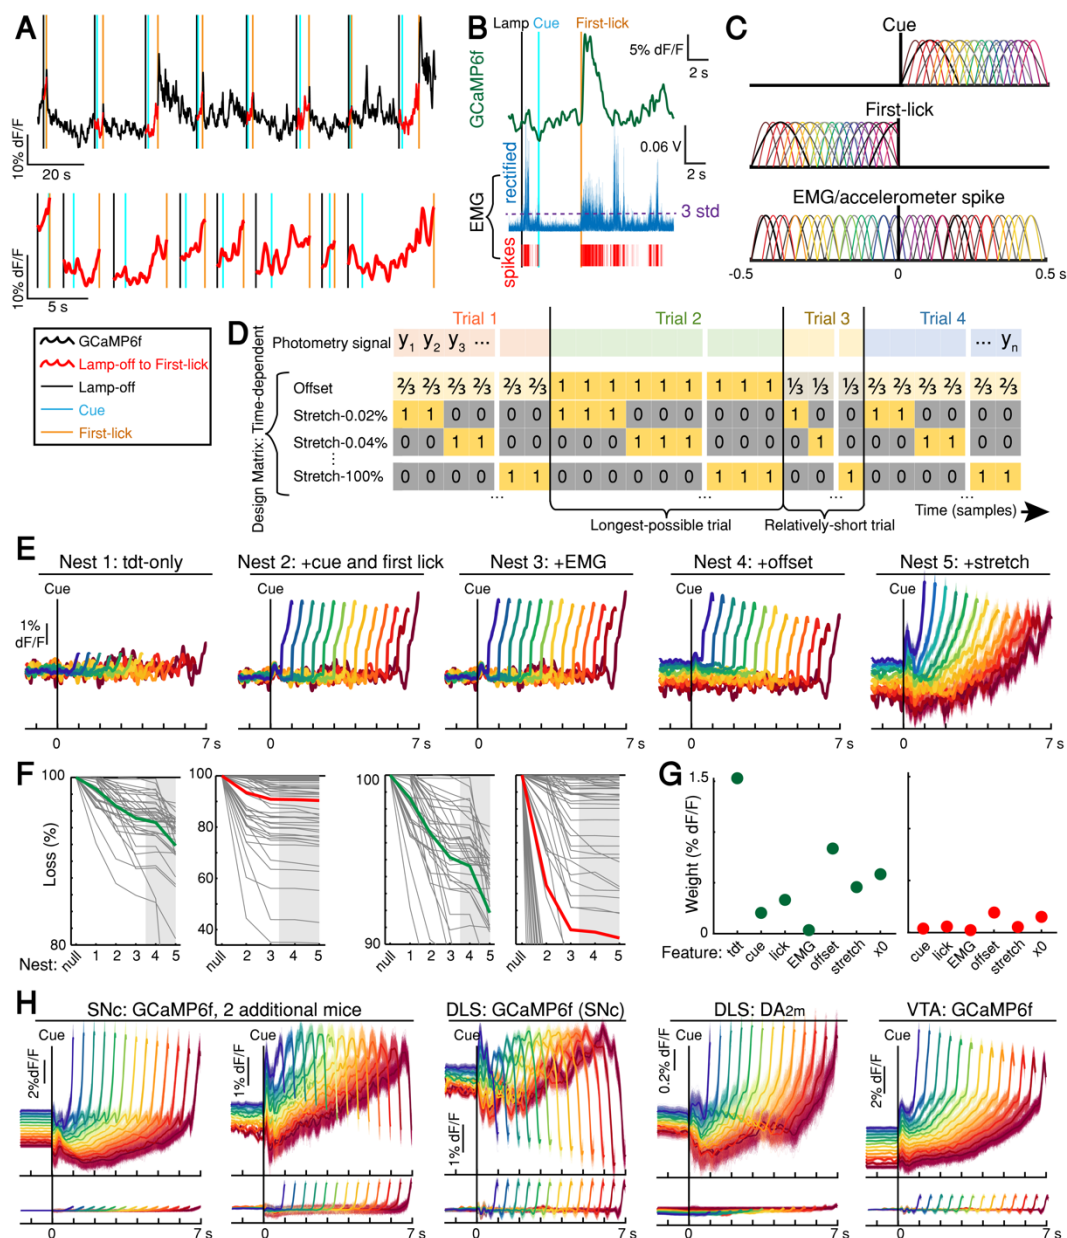

1386

1387

1388

1389

1390

1391

1392

1393

1394

1395

1396

1397

1398

1399

1400

1401

1402

1403

1404

1405

1406

1407

1408

1409

**Figure 5—figure supplement 1.** DAN signal encoding model parameterization and model selection. (A) Schematic of photometry timeseries fit by encoding model. The lamp-off to first-lick interval was excised from each trial in a session (top) and concatenated to produce the timeseries fit by the model (bottom). (B) EMG spikes derivation: thresholding rectified EMG at 3 standard deviations (example trial). (C) Optimized basis kernels to produce timing-independent features. (D) Schematic of Design Matrix for timing-dependent features. (E) GCaMP6f model fits by nest iteration for example session. Shading: model error simulated 300x. (F) Model loss by nest iteration. Green: mean loss for SNc GCaMP6f; red: mean loss for tdt; grey lines: individual sessions; grey shading: timing-dependent nests. Left: full-scale view of all datasets. Right: mean GCaMP6f and tdt loss compared on same scale. (G) Summary of feature weights across SNc GCaMP6f (left) and tdt (right) models. Coefficient weights were rectified, summed, and divided by the number of predictors per feature. 2x standard error bars (too small to see). All features were significant in both GCaMP6f and tdt models. (H) Top: examples of the full timing-dependent model (nest 5) from additional mice for all recorded dopaminergic signals. Bottom: tdt control channel fit. Model errors simulated 300x. Some mice show downward-going movement-related spikes at SNc cell bodies (second panel). All mice showed downward-going movement-related spikes from SNc terminals in DLS (middle panel). Source data: *Figure 5—source data*.

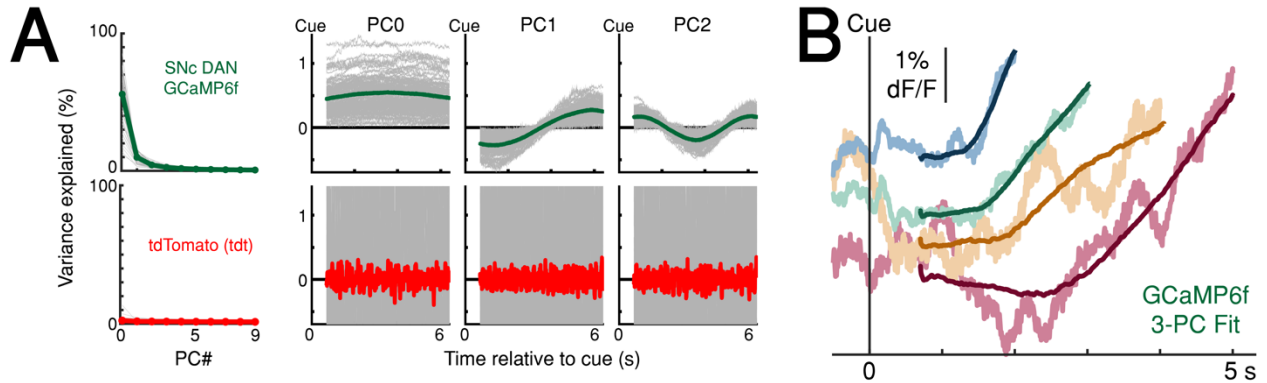

1410  
1411  
1412  
1413  
1414  
1415  
1416  
1417  
1418  
1419  
1420

**Figure 5—figure supplement 2.** Principal component analysis (PCA) of the ramping interval (0.7 s up to first-lick relative to cue). **(A)** Left: Variance explained by first 10 principal components (PC). Right: first three principal components. Green line: mean PC, GCaMP6f recorded at SNc; Red line: mean PC, tdTomato (tdt) recorded at SNc and VTA; Grey lines: single-session data. X-axis shown for longest-possible interpolated trial duration; trials of shorter duration were interpolated to have the same number of samples for PCA. **(B)** Example session data simulated with first 3 PCs. Noisy traces: actual averaged GCaMP6f signals truncated at first-lick onset; Smooth traces: PC fits of the same trials. Source data: *Figure 5—source data*.

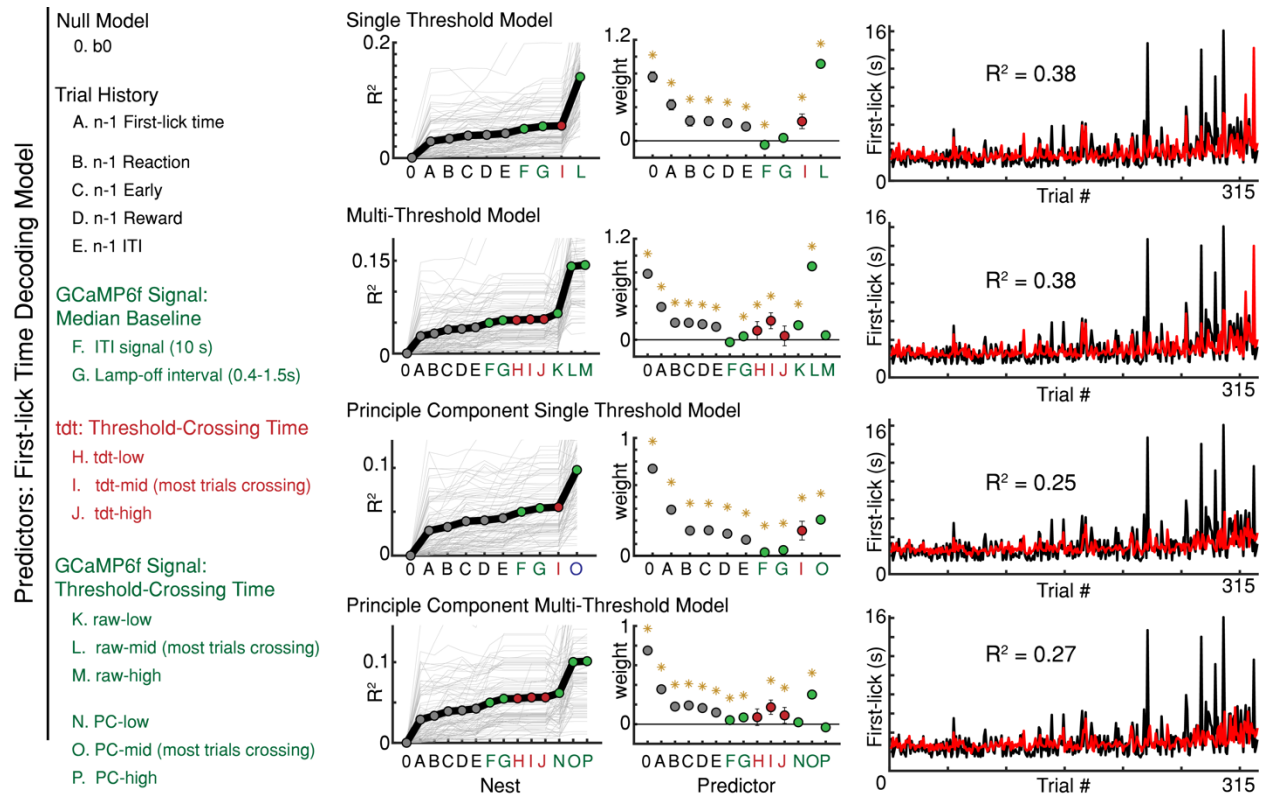

1421  
1422  
1423  
1424  
1425  
1426  
1427  
1428  
1429  
1430  
1431

**Figure 6—figure supplement 1.** Variations of the first-lick time decoding model. \*:  $p < 0.05$ , error bars: 95% confidence intervals. GCaMP6f threshold crossing time dominated every version of the model;  $n-1^{\text{th}}$  trial first-lick time was consistently the second-best predictor. Source data: *Figure 6—source data*.

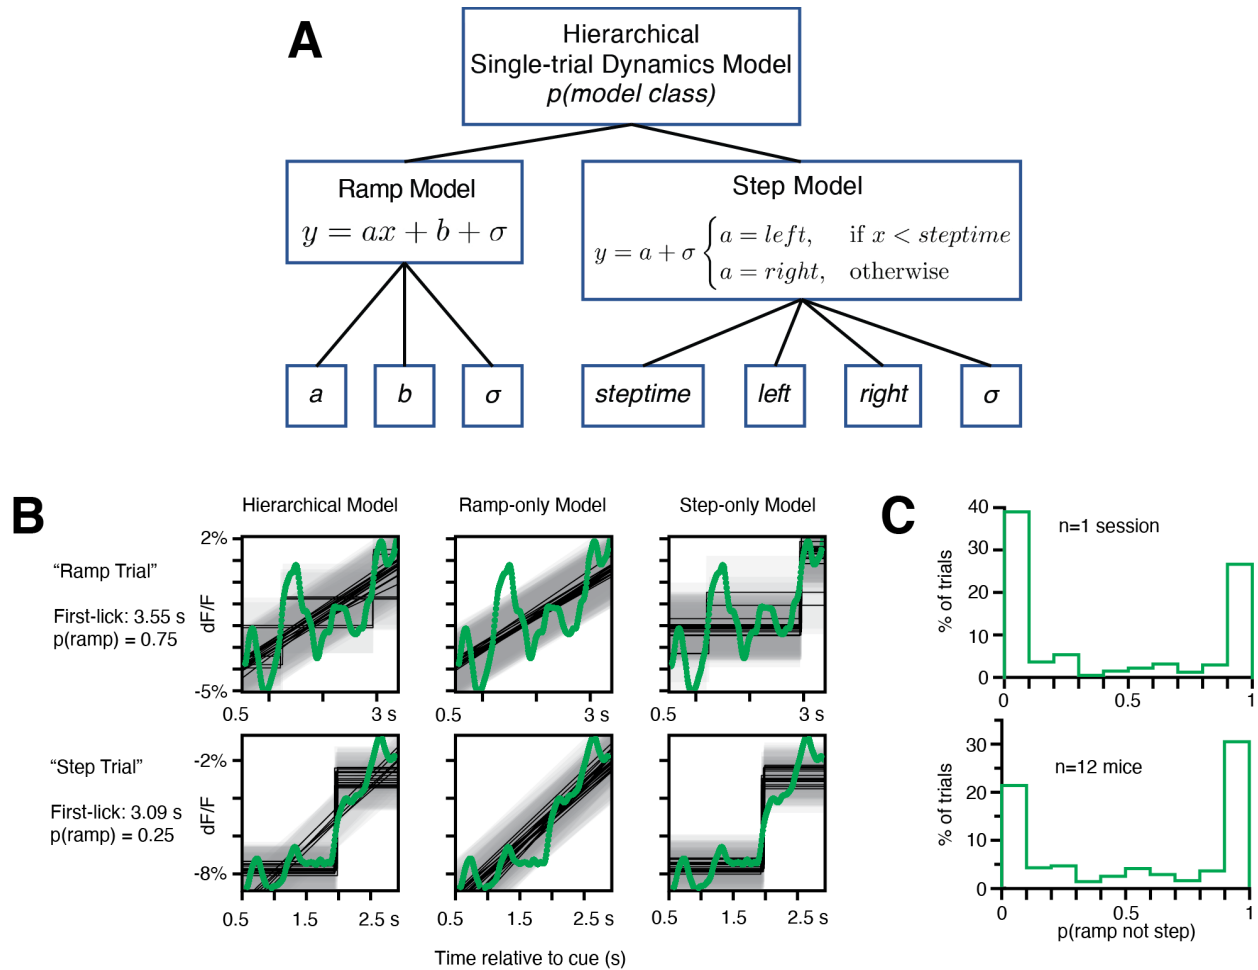

1432  
1433

1434 **Figure 6—figure supplement 2.** Analysis of single-trial dynamics: Hierarchical Bayesian Ramp vs. Step  
 1435 Modeling. (A) Schematic (see *Methods: Hierarchical Bayesian Modeling of Single-trial Dynamics*). (B)  
 1436 Example fits from hierarchical model on 2 example single trials from the same epoch in a single session.  
 1437 Green: SNc GCaMP6f single-trial signal, light grey shading: noise band, dark grey lines: model fits. Note  
 1438 that the top trial is more frequently classified as a ramp, and the lower trial is more frequently classified as  
 1439 a step. However, both the ramp and step models return intuitive and reasonable fits to both single-trial  
 1440 signals. (C). Probability of model class across all trials. X axis: 0 indicates all probabilistic fits for a given  
 1441 trial returned step-class models; 1 indicates all ramp-class models. Single sessions across mice showed  
 1442 considerable uncertainty in model classification. Source data: *Figure 6—source data*.

1443  
1444  
1445  
1446

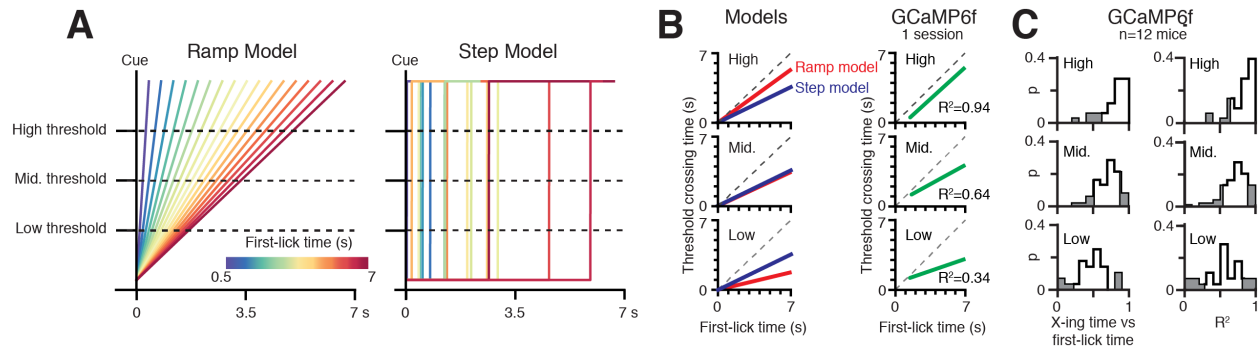

1447  
1448

1449 **Figure 6—figure supplement 3.** Geometric analysis of single-trial dynamics with Multiple Threshold  
1450 Modeling. (A) Left: linear ramp model, Right: discrete step model. Step positions drawn from uniform  
1451 distribution over the cue-to-first-lick interval. Low-, Mid- and High- level thresholds shown. (B) Threshold-  
1452 crossing time vs. first-lick time (“X-ing time vs. first-lick time”) for (from top to bottom) High-, Mid- and  
1453 Low-level thresholds. Left: simulation predictions for ramp and step models. Right: X-ing time vs. first-  
1454 lick time regression fit on single trials from 1 session (data from *Figure 6A*). The step model predicts X-  
1455 ing time vs. first-lick time does not change across threshold levels, whereas ramp model predicts the slope  
1456 of this relationship increases as threshold is raised. Single-trial GCaMP6f data exhibits increasing X-ing  
1457 time vs. first-lick time slope with increasing threshold level, consistent with the ramp model but inconsistent  
1458 with the step model. (C). X-ing time vs. first-lick time across all mice. Left column: frequency of slope  
1459 relationship across sessions, right column: variance explained. Source data: *Figure 6—source data*.

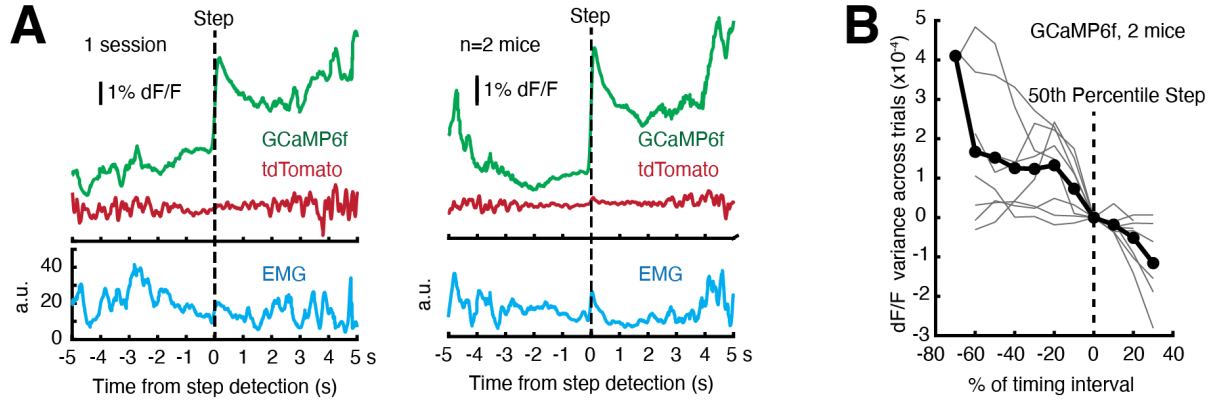

1460  
1461  
1462  
1463  
1464  
1465  
1466  
1467  
1468

**Figure 6—figure supplement 4.** Assessing single-trial dynamics. (A) Single-trial signals aligned to discrete step position as found by Bayesian step model do not exhibit discrete step dynamics. To best estimate step times, the two animals with the highest GCaMP6f S:N were examined (Mouse B5 and B6). Left: 1 session, Right: average of signals from both mice. (B) Variance of GCaMP6f signals across trials. Step times were computed by Bayesian step model. An ideal step model predicts maximal variance at the 50<sup>th</sup> percentile step, but variance declined monotonically on average. Grey lines: single sessions; black line: average. For detailed explanation, see *Methods: Single-trial variance analysis for discrete step dynamics*. Source data: *Figure 6—source data*.



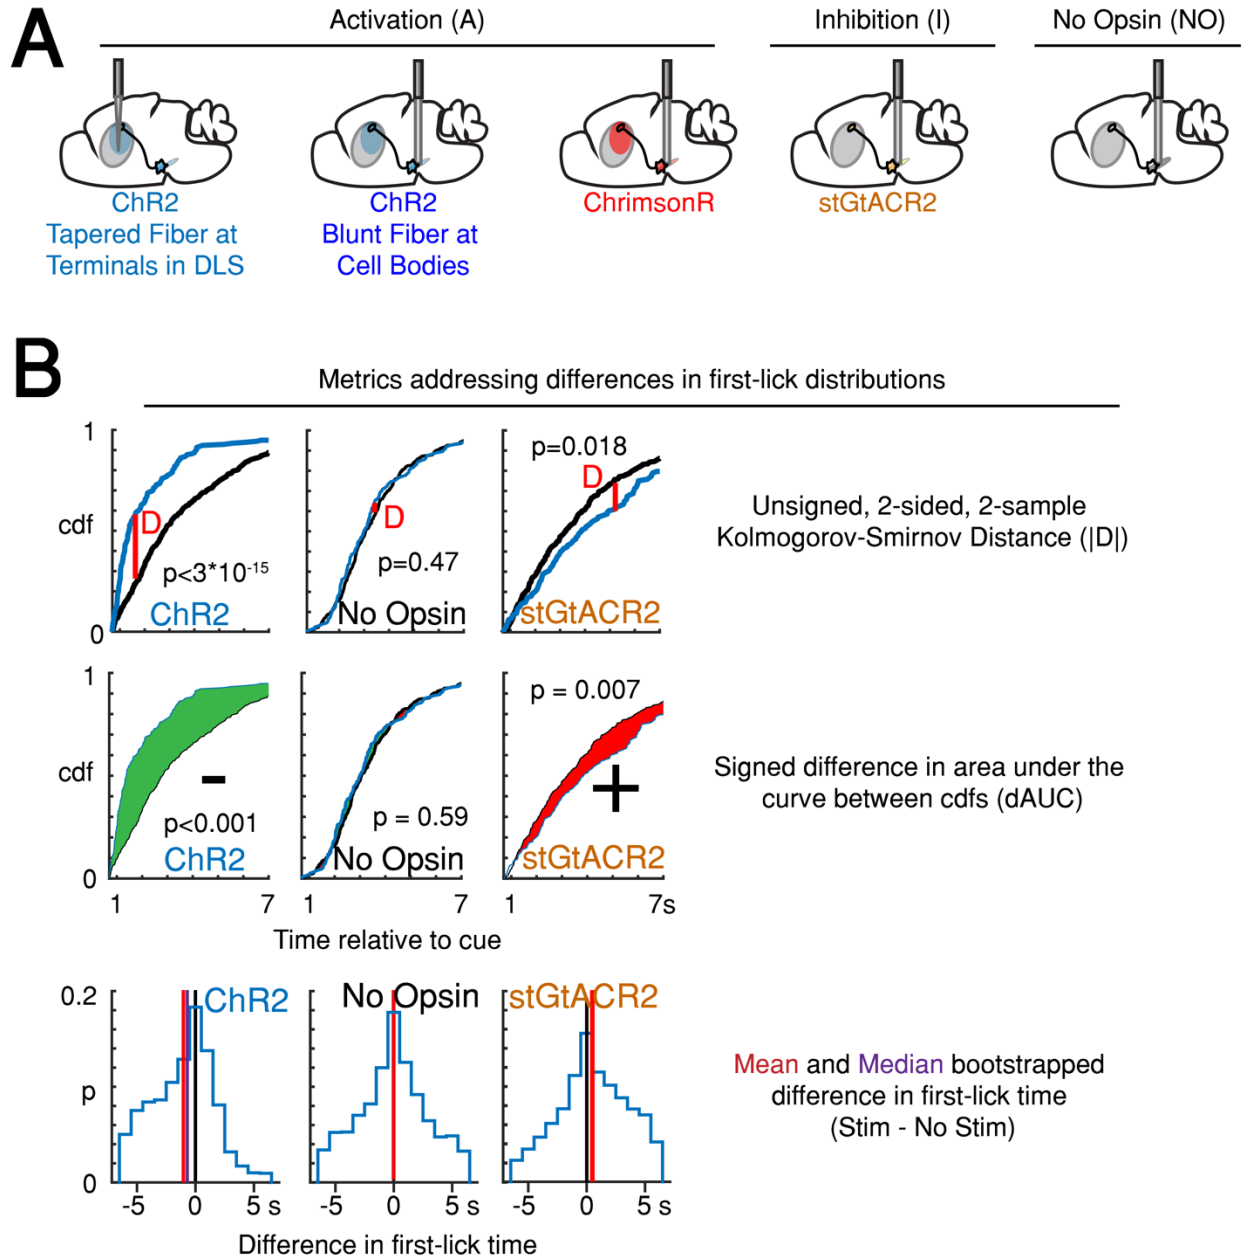

1469 **Figure 7—figure supplement 1.** Variations on measurements of optogenetic effects. (A) Strategy for  
 1470 optogenetic targeting of DANs. (B) Comparison of four complementary metrics for addressing optogenetic  
 1471 effects. Left: unsigned Kolmogorov-Smirnov Distance (KS-D) analysis of differences in first-lick time  
 1472 distribution. Center: signed, bootstrapped comparison of difference in area under the cdf curves (dAUC).  
 1473 Right: mean and median bootstrapped difference in first-lick time. Source data: *Figure 7—source data*.

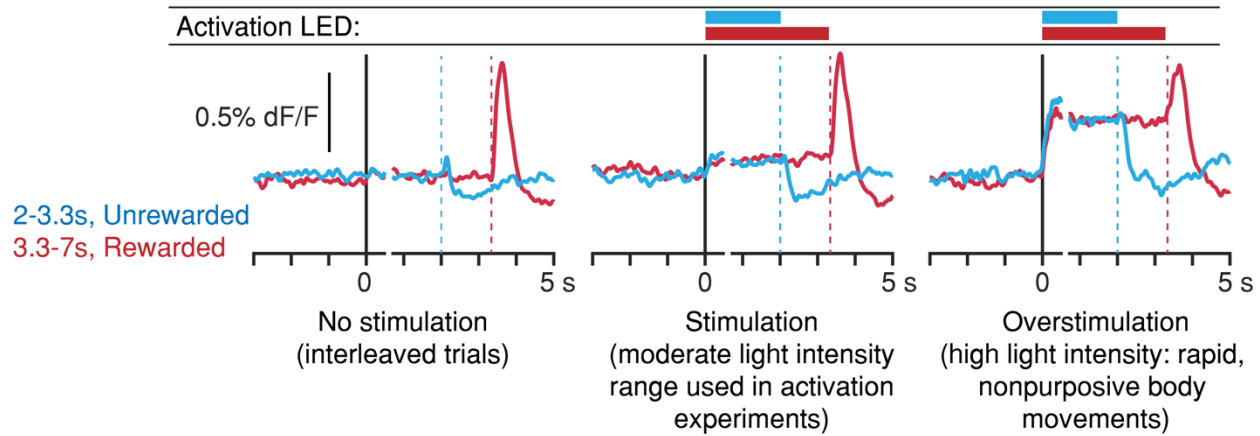

1474  
1475

1476 **Figure 7—figure supplement 2.** Light-power calibration for optogenetic activation of DANs. In preliminary  
1477 experiments, DLS dopamine levels were monitored during the self-timed movement task, in which SNc DANs  
1478 were activated randomly on 30% of interleaved trials. Dashed vertical lines: first-lick time. **Left:** interleaved,  
1479 unstimulated trials (2 mice, 8 sessions). **Middle:** stimulated trials at the range of light levels used in the activation  
1480 experiments show slightly elevated DLS dopamine signals compared to interleaved, unstimulated trials. First-  
1481 lick timing was generally early-shifted in these sessions. **Right:** in a subset of preliminary calibration sessions,  
1482 stimulation light levels were increased to the point where rapid, nonpurposive limb/trunk movements were  
1483 observed throughout stimulation (1 mouse, 3 sessions). DLS dopamine signals show much higher, sustained  
1484 increases throughout stimulation. Ongoing body movements disrupted task participation. Source data: *Figure*  
1485 *7—source data.*

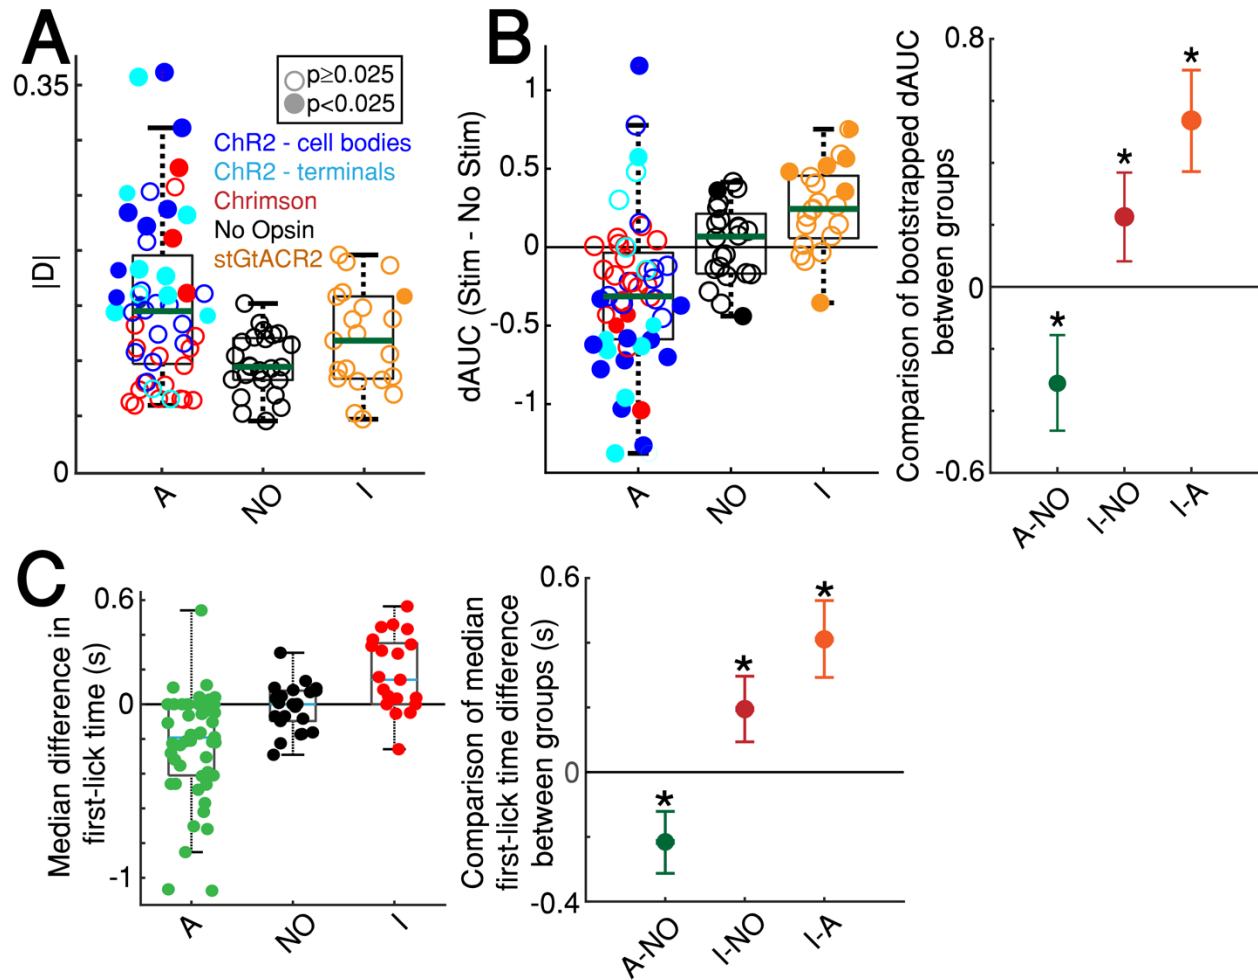

1486  
1487

1488 **Figure 7—figure supplement 3.** Quantification of optogenetic effects with additional metrics. (A) KS-D  
1489 analysis: all sessions. “A”: activation sessions; “NO”: no opsin sessions; “I”: inhibition sessions. Filled  
1490 circles indicate significant difference between stimulated/unstimulated trials on single session ( $p < 0.025$ , 2-  
1491 sided, 2-sample KS test). Standard box plot, line: median, box: upper/lower quartiles; whiskers: 1.5x IQR.  
1492 (B) Left: bootstrapped dAUC Assay: all sessions, standard box plot as in (A). Filled circles: significant  
1493 difference on single session ( $p < 0.025$ , 2-sided bootstrapped dAUC test, see *Methods*). Right: comparison  
1494 of dAUC in first-lick distributions across all sessions between groups. Error bars denote bootstrapped 95%  
1495 confidence interval (\*:  $p < 0.05$ ). (C) Left: median bootstrapped difference in first-lick time, stimulated-  
1496 minus-unstimulated trials, standard box plot as in (A). Dots: single sessions. Right: Comparison of median  
1497 difference in first-lick time across all sessions. Error bars denote bootstrapped 95% confidence interval  
1498 (\*:  $p < 0.05$ ). Source data: *Figure 7—source data*.

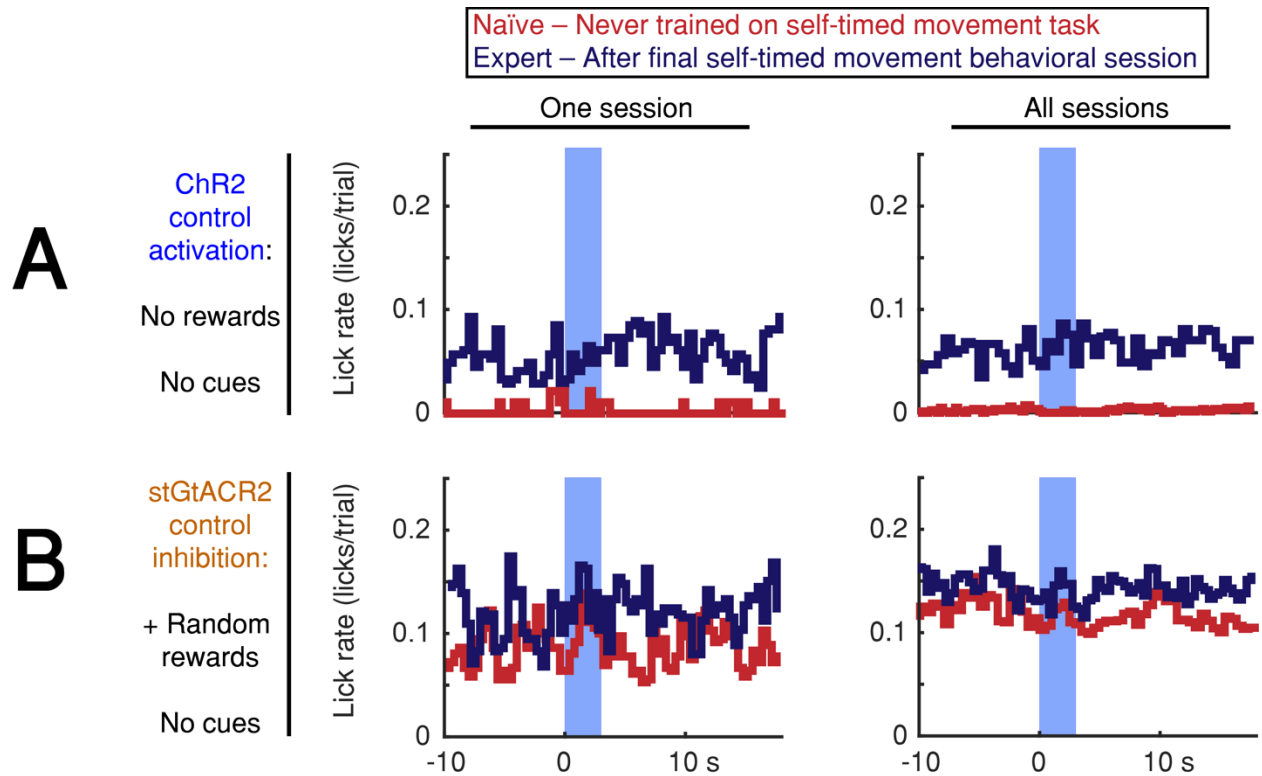

1499  
1500 **Figure 7—figure supplement 4.** Optogenetic DAN stimulation does not cause or prevent licking. **(A,B)**  
1501 Stimulation-aligned lick-rate during control sessions. Animals were tested in 1-3 control sessions both before  
1502 exposure to the self-timed movement task (red) and in 1-2 control sessions after the end of behavioral training  
1503 (navy). Blue bar indicates stimulation period (3 s). Left: one session, Right: all sessions. **(A)** Activation control  
1504 sessions (no cues or rewards). Animals were head-fixed on the behavioral platform and stimulated randomly at  
1505 the same pace as the standard 3.3 s self-timed movement task. Activation did not elicit immediate licking in any  
1506 session. **(B)** Inhibition-control sessions (no cues, + random rewards). Animals were head-fixed on the behavioral  
1507 platform while receiving juice rewards at random times. Inhibition did not prevent licking in any session. Source  
1508 data: *Figure 7—source data*.

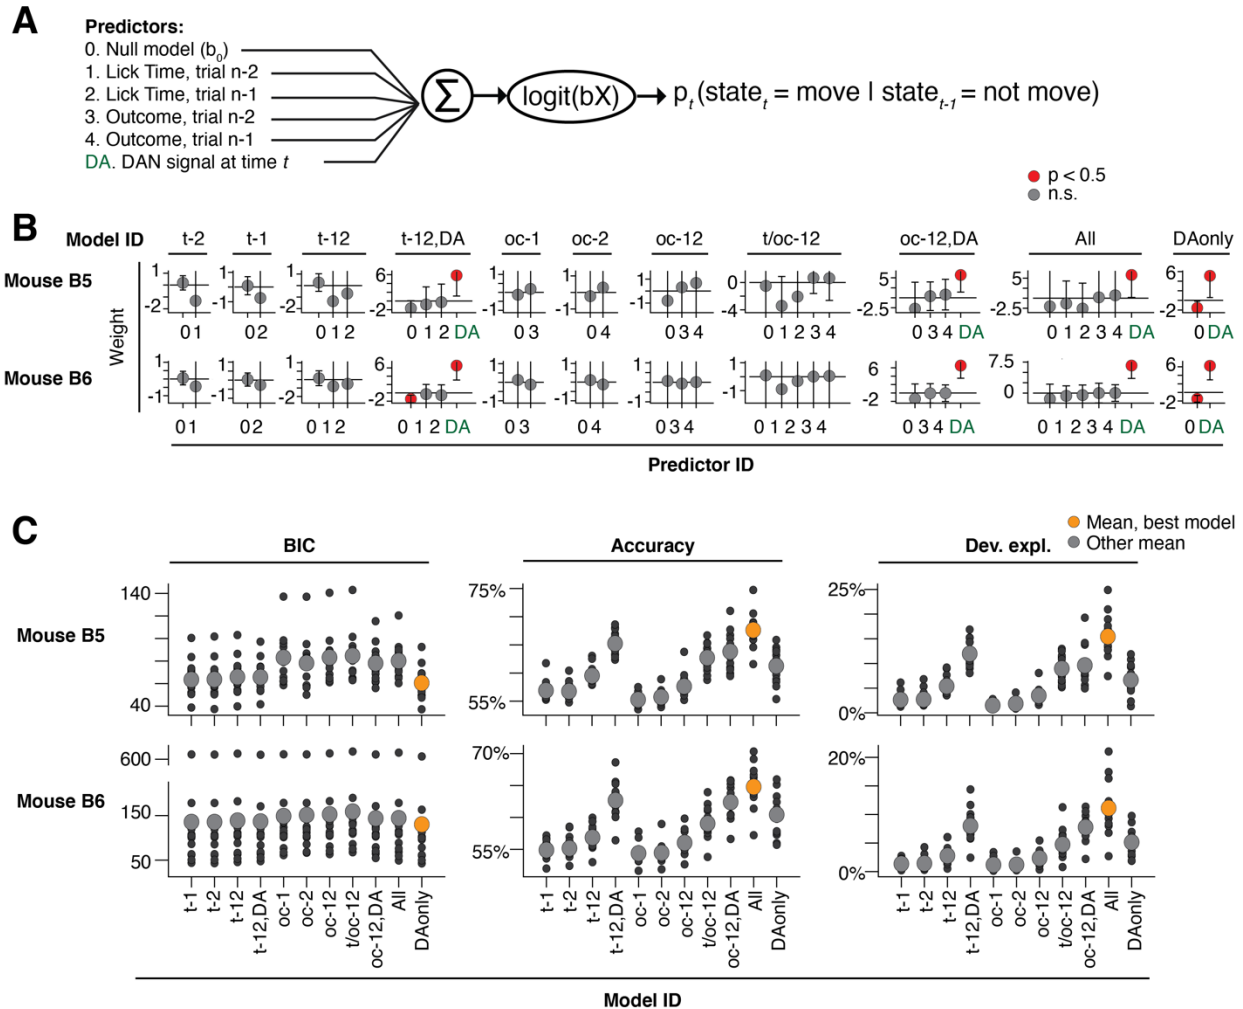

1509

1510

1511 **Figure 8—figure supplement 1.** Probabilistic movement time decoding model: model selection. (A)

1512 Model schematic. To assess previous trial history on the same footing as dopaminergic signals, time  $t$  during

1513 model selection was limited to a 500 ms “time-slice,” with each time-slice fit separately by the model.

1514 Dopaminergic signals were averaged within each time-slice, such that each trial provided one and only one

1515 dopaminergic measurement, one set of trial history terms, and one movement state per time slice (see

1516 *Methods: Single-trial probabilistic movement state decoding model, model selection*). (B) Model fit

1517 weights. Model ID: corresponds to the predictors included from the schematic. x-axis labels: the predictor

1518 ID from the schematic. Predictor weights averaged across time-slices. (C) Model selection criteria. The

1519 model omitting the previous trial history predictors (predictors #1-4) was consistently the best model as

1520 selected by BIC, AIC and AICc (results similar across metrics, BIC shown alone for clarity). Source data:

1521 *Figure 8—source data.*

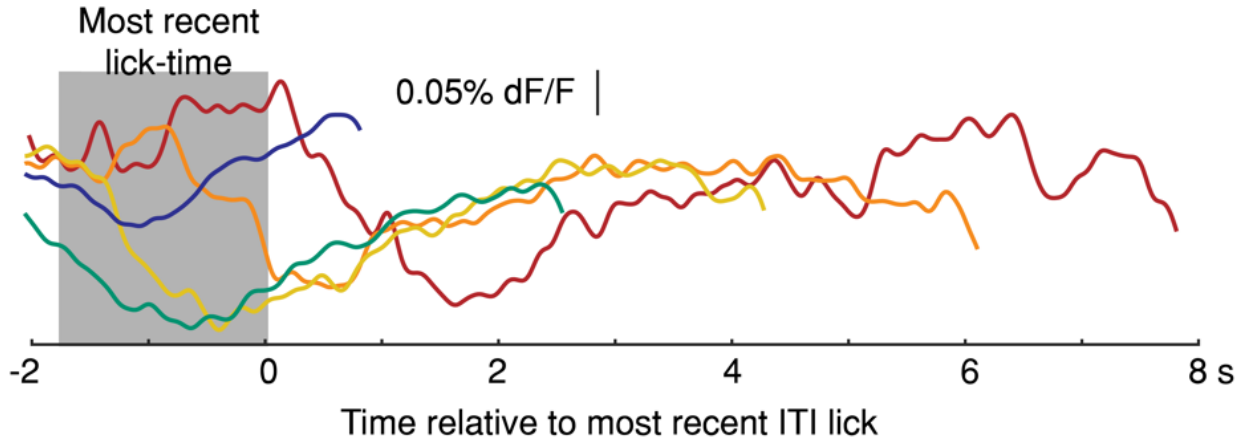

1522  
1523  
1524  
1525  
1526  
1527

**Figure 8—figure supplement 2.** Average Intertrial Interval (ITI) GCaMP6f signals aligned to most recent previous lick-time. Signals plotted up to onset of next spontaneous, self-initiated lick during the ITI. (1 mouse, 5 sessions, truncated 150 ms before lick). Source data: *Figure 8—source data*.

## 1528 REFERENCES

- 1529 Albin, R.L., Young, A.B., and Penney, J.B. (1989). The functional anatomy of basal ganglia disorders.  
1530 *Trends Neurosci* *12*, 366-375.
- 1531 Anger, D. (1956). The dependence of interresponse times upon the relative reinforcement of different  
1532 interresponse times. *J Exp Psychol* *52*, 145-161.
- 1533 Backman, C.M., Malik, N., Zhang, Y., Shan, L., Grinberg, A., Hoffer, B.J., Westphal, H., and Tomac, A.C.  
1534 (2006). Characterization of a mouse strain expressing Cre recombinase from the 3' untranslated region of  
1535 the dopamine transporter locus. *Genesis* *44*, 383-390.
- 1536 Barter, J.W., Li, S., Lu, D., Bartholomew, R.A., Rossi, M.A., Shoemaker, C.T., Salas-Meza, D., Gaidis, E.,  
1537 and Yin, H.H. (2015). Beyond reward prediction errors: the role of dopamine in movement kinematics. *Front*  
1538 *Integr Neurosci* *9*, 39.
- 1539 Barthel, C., Nonnekes, J., van Helvert, M., Haan, R., Janssen, A., Delval, A., Weerdesteyn, V., Debu, B.,  
1540 van Wezel, R., Bloem, B.R., *et al.* (2018). The laser shoes: A new ambulatory device to alleviate freezing  
1541 of gait in Parkinson disease. *Neurology* *90*, e164-e171.
- 1542 Bartholomew, R.A., Li, H., Gaidis, E.J., Stackmann, M., Shoemaker, C.T., Rossi, M.A., and Yin, H.H. (2016).  
1543 Striatonigral control of movement velocity in mice. *Eur J Neurosci* *43*, 1097-1110.
- 1544 Bloxham, C.A., Mindel, T.A., and Frith, C.D. (1984). Initiation and execution of predictable and  
1545 unpredictable movements in Parkinson's disease. *Brain* *107* ( Pt 2), 371-384.
- 1546 Chandrasekaran, C., Soldado-Magraner, J., Peixoto, D., Newsome, W.T., Shenoy, K.V., and Sahani, M.  
1547 (2018). Brittleness in model selection analysis of single neuron firing rates. *bioRxiv*, 430710.
- 1548 Coddington, L.T., and Dudman, J.T. (2018). The timing of action determines reward prediction signals in  
1549 identified midbrain dopamine neurons. *Nat Neurosci* *21*, 1563-1573.
- 1550 Coddington, L.T., and Dudman, J.T. (2019). Learning from Action: Reconsidering Movement Signaling in  
1551 Midbrain Dopamine Neuron Activity. *Neuron* *104*, 63-77.
- 1552 Cusumano-Towner, M.F., and Mansinghka, V.K. (2018). Using probabilistic programs as proposals. *ArXiv*  
1553 *abs/1801.03612*.
- 1554 Cusumano-Towner, M.F., Saad, F.A., Lew, A.K., and Mansinghka, V.K. (2019). Gen: A General-Purpose  
1555 Probabilistic Programming System with Programmable Inference. Proceedings of the 40th Acm Sigplan  
1556 Conference on Programming Language Design and Implementation (PLDI '19), 221-236.
- 1557 da Silva, J.A., Tecuapetla, F., Paixão, V., and Costa, R.M. (2018). Dopamine neuron activity before action  
1558 initiation gates and invigorates future movements. *Nature* *554*, 244-248.

- 1559 Deecke, L. (1996). Planning, preparation, execution, and imagery of volitional action. *Brain Res Cogn Brain Res* 3, 59-64.  
1560
- 1561 DeLong, M.R. (1990). Primate models of movement disorders of basal ganglia origin. *Trends Neurosci* 13,  
1562 281-285.
- 1563 Dews, P.B., and Morse, W.H. (1958). Some observations on an operant in human subjects and its  
1564 modification by dextro amphetamine. *J Exp Anal Behav* 1, 359-364.
- 1565 Dodson, P.D., Dreyer, J.K., Jennings, K.A., Syed, E.C., Wade-Martins, R., Cragg, S.J., Bolam, J.P., and  
1566 Magill, P.J. (2016). Representation of spontaneous movement by dopaminergic neurons is cell-type  
1567 selective and disrupted in parkinsonism. *Proc Natl Acad Sci U S A* 113, E2180-2188.
- 1568 Dudman, J.T., and Krakauer, J.W. (2016). The basal ganglia: from motor commands to the control of vigor.  
1569 *Curr Opin Neurobiol* 37, 158-166.
- 1570 Eckard, M.L., and Kyonka, E.G.E. (2018). Differential reinforcement of low rates differentially decreased  
1571 timing precision. *Behav Processes* 151, 111-118.
- 1572 Emmons, E.B., De Corte, B.J., Kim, Y., Parker, K.L., Matell, M.S., and Narayanan, N.S. (2017). Rodent  
1573 Medial Frontal Control of Temporal Processing in the Dorsomedial Striatum. *J Neurosci* 37, 8718-8733.
- 1574 Engelhard, B., Finkelstein, J., Cox, J., Fleming, W., Jang, H.J., Ornelas, S., Koay, S.A., Thiberge, S.Y.,  
1575 Daw, N.D., Tank, D.W., *et al.* (2019). Specialized coding of sensory, motor and cognitive variables in VTA  
1576 dopamine neurons. *Nature* 570, 509-513.
- 1577 Fahn, S. (2011). Classification of movement disorders. *Mov Disord* 26, 947-957.
- 1578 Freeze, B.S., Kravitz, A.V., Hammack, N., Berke, J.D., and Kreitzer, A.C. (2013). Control of basal ganglia  
1579 output by direct and indirect pathway projection neurons. *J Neurosci* 33, 18531-18539.
- 1580 Gallistel, C.R., and Gibbon, J. (2000). Time, rate, and conditioning. *Psychol Rev* 107, 289-344.
- 1581 Gelman, A., and Hill, J. (2006). Data analysis using regression and multilevel/hierarchical models  
1582 (Cambridge ; New York: Cambridge University Press).
- 1583 Grillner, S., and Robertson, B. (2016). The Basal Ganglia Over 500 Million Years. *Curr Biol* 26, R1088-  
1584 R1100.
- 1585 Guo, Z.V., Hires, S.A., Li, N., O'Connor, D.H., Komiyama, T., Ophir, E., Huber, D., Bonardi, C., Morandell,  
1586 K., Gutnisky, D., *et al.* (2014). Procedures for behavioral experiments in head-fixed mice. *PLoS One* 9,  
1587 e88678.
- 1588 Hallett, M. (2007). Volitional control of movement: the physiology of free will. *Clin Neurophysiol* 118, 1179-  
1589 1192.



- 1590 Hallett, M., and Khoshbin, S. (1980). A physiological mechanism of bradykinesia. *Brain* *103*, 301-314.
- 1591 Hamid, A.A., Pettibone, J.R., Mabrouk, O.S., Hetrick, V.L., Schmidt, R., Vander Weele, C.M., Kennedy,  
1592 R.T., Aragona, B.J., and Berke, J.D. (2016). Mesolimbic dopamine signals the value of work. *Nat Neurosci*  
1593 *19*, 117-126.
- 1594 Hamilos, A.E., and Assad, J.A. (2020). Application of a unifying reward-prediction error (RPE)-based  
1595 framework to explain underlying dynamic dopaminergic activity in timing tasks. *bioRxiv*,  
1596 2020.2006.2003.128272.
- 1597 Helassa, N., Podor, B., Fine, A., and Torok, K. (2016). Design and mechanistic insight into ultrafast calcium  
1598 indicators for monitoring intracellular calcium dynamics. *Sci Rep* *6*, 38276.
- 1599 Howard, C.D., Li, H., Geddes, C.E., and Jin, X. (2017). Dynamic Nigrostriatal Dopamine Biases Action  
1600 Selection. *Neuron* *93*, 1436-1450 e1438.
- 1601 Howe, M.W., and Dombeck, D.A. (2016). Rapid signalling in distinct dopaminergic axons during locomotion  
1602 and reward. *Nature* *535*, 505-510.
- 1603 Howe, M.W., Tierney, P.L., Sandberg, S.G., Phillips, P.E., and Graybiel, A.M. (2013). Prolonged dopamine  
1604 signalling in striatum signals proximity and value of distant rewards. *Nature* *500*, 575-579.
- 1605 Hughes, L.E., Altena, E., Barker, R.A., and Rowe, J.B. (2013). Perseveration and choice in Parkinson's  
1606 disease: the impact of progressive frontostriatal dysfunction on action decisions. *Cereb Cortex* *23*, 1572-  
1607 1581.
- 1608 Jaldow, E.J., Oakley, D.A., and Davey, G.C. (1990). Performance on two fixed-interval schedules in the  
1609 absence of neocortex in rats. *Behav Neurosci* *104*, 763-777.
- 1610 Kim, H.R., Malik, A.N., Mikhael, J.G., Bech, P., Tsutsui-Kimura, I., Sun, F., Zhang, Y., Li, Y., Watabe-Uchida,  
1611 M., Gershman, S.J., *et al.* (2019). A unified framework for dopamine signals across timescales. *bioRxiv*,  
1612 803437.
- 1613 Kirshenbaum, A.P., Brown, S.J., Hughes, D.M., and Doughty, A.H. (2008). Differential-reinforcement-of-  
1614 low-rate-schedule performance and nicotine administration: a systematic investigation of dose, dose-  
1615 regimen, and schedule requirement. *Behav Pharmacol* *19*, 683-697.
- 1616 Latimer, K.W., Yates, J.L., Meister, M.L., Huk, A.C., and Pillow, J.W. (2015). NEURONAL MODELING.  
1617 Single-trial spike trains in parietal cortex reveal discrete steps during decision-making. *Science* *349*, 184-  
1618 187.
- 1619 Latimer, K.W., Yates, J.L., Meister, M.L., Huk, A.C., and Pillow, J.W. (2016). Response to Comment on  
1620 "Single-trial spike trains in parietal cortex reveal discrete steps during decision-making". *Science* *351*, 1406.
- 1621 Lee, I.H., and Assad, J.A. (2003). Putaminal activity for simple reactions or self-timed movements. *J*  
1622 *Neurophysiol* *89*, 2528-2537.

- 1623 Lee, K., Claar, L.D., Hachisuka, A., Bakhurin, K.I., Nguyen, J., Trott, J.M., Gill, J.L., and Masmanidis, S.C.  
1624 (2020). Temporally restricted dopaminergic control of reward-conditioned movements. *Nat Neurosci* *23*,  
1625 209-216.
- 1626 Libet, B., Gleason, C.A., Wright, E.W., and Pearl, D.K. (1983). Time of conscious intention to act in relation  
1627 to onset of cerebral activity (readiness-potential). The unconscious initiation of a freely voluntary act. *Brain*  
1628 *106 (Pt 3)*, 623-642.
- 1629 Lustig, C., and Meck, W.H. (2005). Chronic treatment with haloperidol induces deficits in working memory  
1630 and feedback effects of interval timing. *Brain Cogn* *58*, 9-16.
- 1631 Maimon, G., and Assad, J.A. (2006). A cognitive signal for the proactive timing of action in macaque LIP.  
1632 *Nat Neurosci* *9*, 948-955.
- 1633 Malapani, C., Rakitin, B., Levy, R., Meck, W.H., Deweer, B., Dubois, B., and Gibbon, J. (1998). Coupled  
1634 temporal memories in Parkinson's disease: a dopamine-related dysfunction. *J Cogn Neurosci* *10*, 316-331.
- 1635 Mazzoni, P., Hristova, A., and Krakauer, J.W. (2007). Why don't we move faster? Parkinson's disease,  
1636 movement vigor, and implicit motivation. *J Neurosci* *27*, 7105-7116.
- 1637 Meck, W.H. (1986). Affinity for the dopamine D2 receptor predicts neuroleptic potency in decreasing the  
1638 speed of an internal clock. *Pharmacol Biochem Behav* *25*, 1185-1189.
- 1639 Meck, W.H. (2006). Neuroanatomical localization of an internal clock: a functional link between mesolimbic,  
1640 nigrostriatal, and mesocortical dopaminergic systems. *Brain Res* *1109*, 93-107.
- 1641 Mello, G.B., Soares, S., and Paton, J.J. (2015). A scalable population code for time in the striatum. *Curr*  
1642 *Biol* *25*, 1113-1122.
- 1643 Merchant, H., Harrington, D.L., and Meck, W.H. (2013). Neural basis of the perception and estimation of  
1644 time. *Annu Rev Neurosci* *36*, 313-336.
- 1645 Mikhael, J.G., and Gershman, S.J. (2019). Adapting the flow of time with dopamine. *J Neurophysiol* *121*,  
1646 1748-1760.
- 1647 Mikhael, J.G., Kim, H.R., Uchida, N., and Gershman, S.J. (2019). Ramping and State Uncertainty in the  
1648 Dopamine Signal. *bioRxiv*, 805366.
- 1649 Mita, A., Mushiake, H., Shima, K., Matsuzaka, Y., and Tanji, J. (2009). Interval time coding by neurons in  
1650 the presupplementary and supplementary motor areas. *Nat Neurosci* *12*, 502-507.
- 1651 Mohebi, A., Pettibone, J.R., Hamid, A.A., Wong, J.T., Vinson, L.T., Patriarchi, T., Tian, L., Kennedy, R.T.,  
1652 and Berke, J.D. (2019). Dissociable dopamine dynamics for learning and motivation. *Nature* *570*, 65-70.

- 1653 Panigrahi, B., Martin, K.A., Li, Y., Graves, A.R., Vollmer, A., Olson, L., Mensh, B.D., Karpova, A.Y., and  
1654 Dudman, J.T. (2015). Dopamine Is Required for the Neural Representation and Control of Movement Vigor.  
1655 *Cell* *162*, 1418-1430.
- 1656 Park, I.M., Meister, M.L., Huk, A.C., and Pillow, J.W. (2014). Encoding and decoding in parietal cortex  
1657 during sensorimotor decision-making. *Nat Neurosci* *17*, 1395-1403.
- 1658 Parker, N.F., Cameron, C.M., Taliaferro, J.P., Lee, J., Choi, J.Y., Davidson, T.J., Daw, N.D., and Witten,  
1659 I.B. (2016). Reward and choice encoding in terminals of midbrain dopamine neurons depends on striatal  
1660 target. *Nat Neurosci* *19*, 845-854.
- 1661 Patriarchi, T., Cho, J.R., Merten, K., Howe, M.W., Marley, A., Xiong, W.H., Folk, R.W., Broussard, G.J.,  
1662 Liang, R., Jang, M.J., *et al.* (2018). Ultrafast neuronal imaging of dopamine dynamics with designed  
1663 genetically encoded sensors. *Science* *360*.
- 1664 Rakitin, B.C., Gibbon, J., Penney, T.B., Malapani, C., Hinton, S.C., and Meck, W.H. (1998). Scalar  
1665 expectancy theory and peak-interval timing in humans. *J Exp Psychol Anim Behav Process* *24*, 15-33.
- 1666 Remington, E.D., Narain, D., Hosseini, E.A., and Jazayeri, M. (2018). Flexible Sensorimotor Computations  
1667 through Rapid Reconfiguration of Cortical Dynamics. *Neuron* *98*, 1005-1019 e1005.
- 1668 Romo, R., Scarnati, E., and Schultz, W. (1992). Role of primate basal ganglia and frontal cortex in the  
1669 internal generation of movements. II. Movement-related activity in the anterior striatum. *Exp Brain Res* *91*,  
1670 385-395.
- 1671 Runyan, C.A., Piasini, E., Panzeri, S., and Harvey, C.D. (2017). Distinct timescales of population coding  
1672 across cortex. *Nature* *548*, 92-96.
- 1673 Schultz, W., Dayan, P., and Montague, P.R. (1997). A neural substrate of prediction and reward. *Science*  
1674 *275*, 1593-1599.
- 1675 Schuster, C.R., and Zimmerman, J. (1961). Timing behavior during prolonged treatment with dl-  
1676 amphetamine. *J Exp Anal Behav* *4*, 327-330.
- 1677 Shadlen, M.N., Kiani, R., Newsome, W.T., Gold, J.I., Wolpert, D.M., Zylberberg, A., Ditterich, J., de Lafuente,  
1678 V., Yang, T., and Roitman, J. (2016). Comment on "Single-trial spike trains in parietal cortex reveal discrete  
1679 steps during decision-making". *Science* *351*, 1406.
- 1680 Shenoy, K.V., Sahani, M., and Churchland, M.M. (2013). Cortical control of arm movements: a dynamical  
1681 systems perspective. *Annu Rev Neurosci* *36*, 337-359.
- 1682 Sippy, T., Lapray, D., Crochet, S., and Petersen, C.C. (2015). Cell-Type-Specific Sensorimotor Processing  
1683 in Striatal Projection Neurons during Goal-Directed Behavior. *Neuron* *88*, 298-305.
- 1684 Soares, S., Atallah, B.V., and Paton, J.J. (2016). Midbrain dopamine neurons control judgment of time.  
1685 *Science* *354*, 1273-1277.

- 1686 Sohn, H., Narain, D., Meirhaeghe, N., and Jazayeri, M. (2019). Bayesian Computation through Cortical  
1687 Latent Dynamics. *Neuron* *103*, 934-947 e935.
- 1688 Sun, F., Zhou, J., Dai, B., Qian, T., Zeng, J., Li, X., Zhuo, Y., Zhang, Y., Tan, K., Feng, J., *et al.* (2020).  
1689 New and improved GRAB fluorescent sensors for monitoring dopaminergic activity *in vivo*.  
1690 *bioRxiv*, 2020.2003.2028.013722.
- 1691 Turner, R.S., and Desmurget, M. (2010). Basal ganglia contributions to motor control: a vigorous tutor. *Curr*  
1692 *Opin Neurobiol* *20*, 704-716.
- 1693 Wang, D.V., and Tsien, J.Z. (2011). Conjunctive processing of locomotor signals by the ventral tegmental  
1694 area neuronal population. *PLoS One* *6*, e16528.
- 1695 Wang, J., Narain, D., Hosseini, E.A., and Jazayeri, M. (2018). Flexible timing by temporal scaling of cortical  
1696 responses. *Nat Neurosci* *21*, 102-110.
- 1697 Xu, M., Zhang, S.Y., Dan, Y., and Poo, M.M. (2014). Representation of interval timing by temporally  
1698 scalable firing patterns in rat prefrontal cortex. *Proc Natl Acad Sci U S A* *111*, 480-485.
- 1699 Yttri, E.A., and Dudman, J.T. (2016). Opponent and bidirectional control of movement velocity in the basal  
1700 ganglia. *Nature* *533*, 402-406.
- 1701 Zoltowski, D.M., Latimer, K.W., Yates, J.L., Huk, A.C., and Pillow, J.W. (2019). Discrete Stepping and  
1702 Nonlinear Ramping Dynamics Underlie Spiking Responses of LIP Neurons during Decision-Making.  
1703 *Neuron* *102*, 1249-1258 e1210.
- 1704 Zylberberg, A., and Shadlen, M.N. (2016). Cause for pause before leaping to conclusions about stepping.  
1705 *bioRxiv*, 085886.  
1706
